# Supplementary material for: Palladium-catalyzed intramolecular aza-Wacker-type cyclization of vinyl cyclopropanecarboxamides to access conformationally restricted aza[3.1.0]bicycles
Source: Royal Society of Chemistry journal article supplement (doi:10.1039/d3ra05440c), 2023-01-01

## *Supporting Information*

### **Palladium-Catalyzed Intramolecular Aza-Wacker-Type Cyclization of Vinyl Cyclopropanecarboxamides to Access Conformationally Restricted Aza[3.1.0]bicycles**

Mengjuan Li, Jingya Li, Zhiguo Zhang,\* Liming Chen, Nana Ma,\* Qingfeng Liu, Zhang Xingjie,  
Guisheng Zhang\*

*Key Laboratory of Green Chemical Media and Reactions, Ministry of Education, Henan Key  
Laboratory of Organic Functional Molecule and Drug Innovation, Collaborative Innovation Center  
of Henan Province for Green Manufacturing of Fine Chemicals, School of Chemistry and Chemical  
Engineering, Henan Normal University, Xinxiang 453007, China*

*E-mail: zhangzg@htu.edu.cn, mann076@htu.edu.cn and zgs@htu.edu.cn Fax: (+86)-373-332-5250.*

#### **Table of Contents**

|                                                                                 |            |
|---------------------------------------------------------------------------------|------------|
| <b>I. Optimization of reaction conditions.....</b>                              | <b>S2</b>  |
| <b>II. General procedures.....</b>                                              | <b>S4</b>  |
| <b>III. X-Ray single crystal diffraction data of 2a (CCDC NO. 2142480).....</b> | <b>S8</b>  |
| <b>IV. Analytical data of compounds.....</b>                                    | <b>S11</b> |
| <b>V. References.....</b>                                                       | <b>S30</b> |
| <b>VI. <sup>1</sup>H and <sup>13</sup>C NMR spectra.....</b>                    | <b>S31</b> |

## I. Optimization of reaction conditions

**Table S1:** Optimization of reaction conditions.<sup>a</sup>

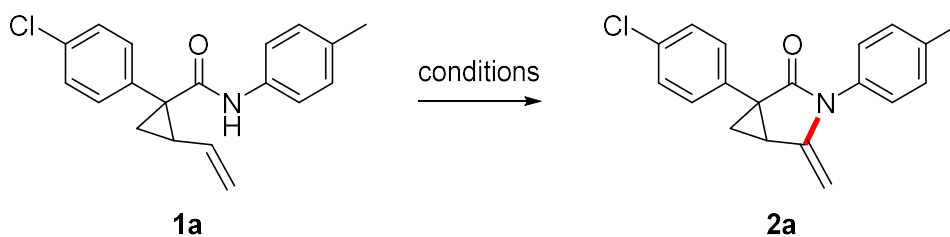

| Entry | Cat/mol%                                           | Base/equiv                            | Solvent            | [O]/equiv                  | Time/h | Yield/% <sup>b</sup> |
|-------|----------------------------------------------------|---------------------------------------|--------------------|----------------------------|--------|----------------------|
| 1     | Pd(PPh <sub>3</sub> ) <sub>2</sub> Cl <sub>2</sub> | K <sub>2</sub> CO <sub>3</sub> (1.0)  | DMF                | O <sub>2</sub>             | 24     | 60                   |
| 2     | Pd(PPh <sub>3</sub> ) <sub>2</sub> Cl <sub>2</sub> | K <sub>2</sub> CO <sub>3</sub> (1.0)  | DMF                | O <sub>2</sub>             | 44     | 58 <sup>c</sup>      |
| 3     | Pd(PPh <sub>3</sub> ) <sub>2</sub> Cl <sub>2</sub> | K <sub>2</sub> CO <sub>3</sub> (1.0)  | DMF                | O <sub>2</sub>             | 24     | 59 <sup>d</sup>      |
| 4     | Pd(OAc) <sub>2</sub>                               | K <sub>2</sub> CO <sub>3</sub> (1.0)  | DMF                | O <sub>2</sub>             | 8      | 46                   |
| 5     | Pd(TFA) <sub>2</sub>                               | K <sub>2</sub> CO <sub>3</sub> (1.0)  | DMF                | O <sub>2</sub>             | 24     | 21 (31)              |
| 6     | PdCl <sub>2</sub>                                  | K <sub>2</sub> CO <sub>3</sub> (1.0)  | DMF                | O <sub>2</sub>             | 24     | 19 (42)              |
| 7     | PdCl <sub>2</sub> (MeCN) <sub>2</sub>              | K <sub>2</sub> CO <sub>3</sub> (1.0)  | DMF                | O <sub>2</sub>             | 24     | 25 (27)              |
| 8     | PdCl <sub>2</sub> (dppe)                           | K <sub>2</sub> CO <sub>3</sub> (1.0)  | DMF                | O <sub>2</sub>             | 24     | 44                   |
| 9     | Pd(dba) <sub>2</sub>                               | K <sub>2</sub> CO <sub>3</sub> (1.0)  | DMF                | O <sub>2</sub>             | 24     | 13 (45)              |
| 10    | Pd(PPh <sub>3</sub> ) <sub>2</sub> Cl <sub>2</sub> | K <sub>2</sub> CO <sub>3</sub> (1.0)  | DMF                | N <sub>2</sub>             | 24     | Trace                |
| 11    | Pd(PPh <sub>3</sub> ) <sub>2</sub> Cl <sub>2</sub> | K <sub>2</sub> CO <sub>3</sub> (1.0)  | DMF                | Air                        | 24     | Trace                |
| 12    | Pd(PPh <sub>3</sub> ) <sub>2</sub> Cl <sub>2</sub> | K <sub>2</sub> CO <sub>3</sub> (1.0)  | DMF                | O <sub>2</sub>             | 33     | 58 (10) <sup>e</sup> |
| 13    | Pd(PPh <sub>3</sub> ) <sub>2</sub> Cl <sub>2</sub> | K <sub>2</sub> CO <sub>3</sub> (1.0)  | DMF                | O <sub>2</sub>             | 17     | 53 <sup>f</sup>      |
| 14    | Pd(PPh <sub>3</sub> ) <sub>2</sub> Cl <sub>2</sub> | K <sub>2</sub> CO <sub>3</sub> (0.5)  | DMF                | O <sub>2</sub>             | 24     | 39 (30)              |
| 15    | Pd(PPh <sub>3</sub> ) <sub>2</sub> Cl <sub>2</sub> | K <sub>2</sub> CO <sub>3</sub> (1.5)  | DMF                | O <sub>2</sub>             | 24     | 60                   |
| 16    | Pd(PPh <sub>3</sub> ) <sub>2</sub> Cl <sub>2</sub> | AcOK (1.0)                            | DMF                | O <sub>2</sub>             | 24     | 26                   |
| 18    | Pd(PPh <sub>3</sub> ) <sub>2</sub> Cl <sub>2</sub> | K <sub>3</sub> PO <sub>4</sub> (1.0)  | DMF                | O <sub>2</sub>             | 24     | 45 (17)              |
| 19    | Pd(PPh <sub>3</sub> ) <sub>2</sub> Cl <sub>2</sub> | Cs <sub>2</sub> CO <sub>3</sub> (1.0) | DMF                | O <sub>2</sub>             | 24     | 49 (18)              |
| 20    | Pd(PPh <sub>3</sub> ) <sub>2</sub> Cl <sub>2</sub> | K <sub>2</sub> CO <sub>3</sub> (1.0)  | NMP                | O <sub>2</sub>             | 24     | 45 (13)              |
| 21    | Pd(PPh <sub>3</sub> ) <sub>2</sub> Cl <sub>2</sub> | K <sub>2</sub> CO <sub>3</sub> (1.0)  | CH <sub>3</sub> CN | O <sub>2</sub>             | 24     | 24 (43)              |
| 22    | Pd(PPh <sub>3</sub> ) <sub>2</sub> Cl <sub>2</sub> | K <sub>2</sub> CO <sub>3</sub> (1.0)  | Dioxane            | O <sub>2</sub>             | 24     | Trace (90)           |
| 23    | Pd(PPh <sub>3</sub> ) <sub>2</sub> Cl <sub>2</sub> | K <sub>2</sub> CO <sub>3</sub> (1.0)  | Toluene            | O <sub>2</sub>             | 24     | Trace (88)           |
| 24    | Pd(PPh <sub>3</sub> ) <sub>2</sub> Cl <sub>2</sub> | K <sub>2</sub> CO <sub>3</sub> (1.0)  | DMSO               | O <sub>2</sub>             | 24     | 37 (39)              |
| 25    | Pd(PPh <sub>3</sub> ) <sub>2</sub> Cl <sub>2</sub> | K <sub>2</sub> CO <sub>3</sub> (1.0)  | THF                | O <sub>2</sub>             | 24     | Trace (94)           |
| 26    | Pd(PPh <sub>3</sub> ) <sub>2</sub> Cl <sub>2</sub> | K <sub>2</sub> CO <sub>3</sub> (1.0)  | DMF                | TBHP (2.0)                 | 24     | 33                   |
| 27    | Pd(PPh <sub>3</sub> ) <sub>2</sub> Cl <sub>2</sub> | K <sub>2</sub> CO <sub>3</sub> (1.0)  | DMF                | <i>m</i> -CPBA (2.0)       | 24     | Trace (60)           |
| 28    | Pd(PPh <sub>3</sub> ) <sub>2</sub> Cl <sub>2</sub> | K <sub>2</sub> CO <sub>3</sub> (1.0)  | DMF                | Cu(OAc) <sub>2</sub> (2.0) | 24     | 12 (69)              |

|    |                                                    |                                      |     |                                                    |    |       |
|----|----------------------------------------------------|--------------------------------------|-----|----------------------------------------------------|----|-------|
| 29 | Pd(PPh <sub>3</sub> ) <sub>2</sub> Cl <sub>2</sub> | K <sub>2</sub> CO <sub>3</sub> (1.0) | DMF | Ag <sub>2</sub> O (2.0)                            | 24 | Trace |
| 30 | Pd(PPh <sub>3</sub> ) <sub>2</sub> Cl <sub>2</sub> | K <sub>2</sub> CO <sub>3</sub> (1.0) | DMF | Oxone (2.0)                                        | 24 | 0     |
| 31 | Pd(PPh <sub>3</sub> ) <sub>2</sub> Cl <sub>2</sub> | K <sub>2</sub> CO <sub>3</sub> (1.0) | DMF | K <sub>2</sub> S <sub>2</sub> O <sub>8</sub> (2.0) | 24 | 0     |

<sup>a</sup> Unless otherwise indicated, the reaction was conducted with **1a** (0.5 mmol, 1.0 equiv), [Pd] salt (5 mol%), base (1.0 equiv) and solvent (2 mL) at 50 °C under O<sub>2</sub>. <sup>b</sup> Recovered of **1a** shown in parentheses after purification by column chromatography. <sup>c</sup> Pd(PPh<sub>3</sub>)<sub>2</sub>Cl<sub>2</sub> (3 mol%). <sup>d</sup> Pd(PPh<sub>3</sub>)<sub>2</sub>Cl<sub>2</sub> (10 mol%). <sup>e</sup> 40 °C. <sup>f</sup> 60 °C.

## II. General procedures.

### 1. General procedures for the synthesis of **1**.

**Method A:** General procedures for **1a-1j**, **11-1x**, **1z** (**1a** as an example)<sup>1, 2</sup>.

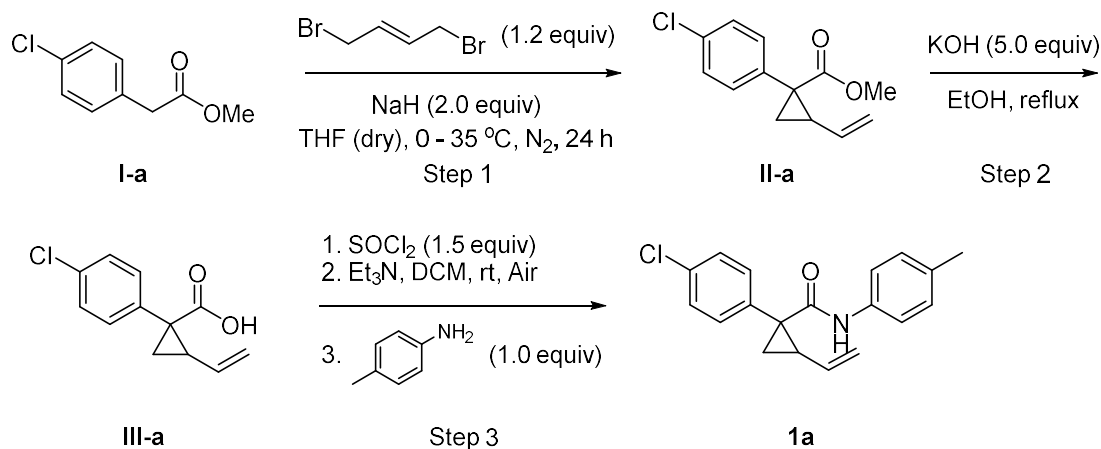

**Step 1:** To a flame-dried round-bottom flask under nitrogen atmosphere was added NaH (4.0 g, 100 mmol, 2.0 equiv) and THF (120 mL). The mixture was cooled to 0 °C while stirring, upon which the methyl 2-(4-chlorophenyl) acetate **I-a** (7.7 mL, 50 mmol, 1.0 equiv) was added. The mixture was warmed to room temperature for 10 minutes then cooled to 0 °C again. (*E*)-1,4-Dibromobut-2-ene (12.8 g, 60 mmol, 1.2 equiv) was then added dropwise, and the reaction was stirred at 35 °C for 24 hours. The reaction was quenched by addition of saturated aqueous NH<sub>4</sub>Cl (150 mL). The layers were separated, and the aqueous layer was extracted with ethyl acetate. The organic layers were combined, dried, filtered and concentrated to an oil. The oil was purified by flash column chromatography with PE and EA (eluent: EA/PE = 1/50) as eluent to give **II-a** as a colorless liquid (8.0 g, 34 mmol, 67%).

**Step 2:** Methyl 1-(4-chlorophenyl)-2-vinylcyclopropane-1-carboxylate **II-a** (8.0 g, 34 mmol, 1.0 equiv), was then dissolved in EtOH (140 mL), combined with KOH (9.5 g, 170 mmol, 5.0 equiv) and stirred under reflux for 3 hours. The reaction was cooled to room temperature and acidified to pH 3-1 with 10% HCl. The aqueous layer was extracted with dichloromethane (100 mL  $\times$  3), and the combined organic layers were dried, filtered, and concentrated to obtain the target product **III-a** as a white solid. (7.54 g, 34 mmol, 99%).

**Step 3:** To a 250 mL round bottom flask equipped with 100 mL CH<sub>2</sub>Cl<sub>2</sub> was added **III-a** (29.0 mmol, 1.0 equiv), SOCl<sub>2</sub> (3.2 mL, 43.5 mmol, 1.5 equiv), the mixture was stirred at room temperature for 10 min, then Et<sub>3</sub>N was added dropwise to the mixture until there is no white smoke produced. *P*-toluidine (3.1 g, 29 mmol, 1.0 equiv) was added to the system dropwise. After the mixture was stirred at room temperature for 2 hours, it was quenched by water (100 mL), and extracted with dichloromethane (120 mL  $\times$  3). The organic layers were washed with saturated brine (120 mL  $\times$  3),



and the organic layers were dried, filtered. Then the residue was purified by a flash silica gel column chromatography (eluent: EA/PE = 1/20) to give the desired product compound **1a** as a white solid (8.2 g, 90%).

**Method B:** General procedure for **1k**<sup>3</sup>.

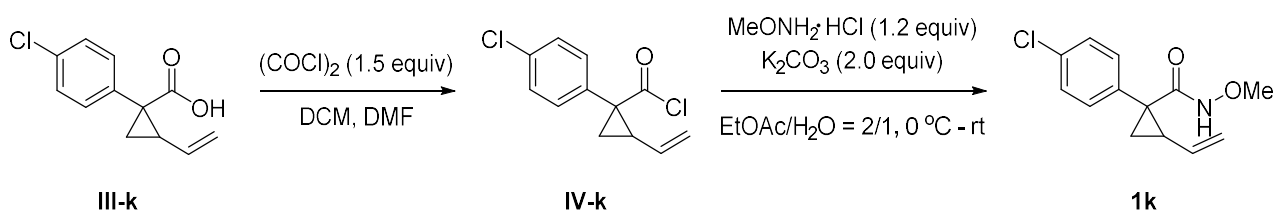

A dried round-bottom flask was charged with the acid **III-k** (2.78 mmol), DCM (15 mL), and 2 drops of DMF. Then, oxalyl chloride (0.529 g, 1.5 equiv) was added dropwise within 5 minutes at 0 °C. The resulting mixture was stirred at room temperature for 3.5 hours and concentrated under reduced pressure. The residue was dissolved in EA (20 mL) and K<sub>2</sub>CO<sub>3</sub> (0.768 g, 2.0 equiv), MeONH<sub>2</sub>·HCl (0.278 g, 1.2 equiv) and water (10 mL) were added sequentially. The resulting mixture was stirred at room temperature. After the completion of the reaction, extracted with EA (50 mL × 2). The organic layer was washed with saturated aqueous NaHCO<sub>3</sub> (15 mL × 2), brine (15 mL × 2), and dried over anhydrous Na<sub>2</sub>SO<sub>4</sub>, filtered and concentrated under reduced pressure. The crude product was recrystallized (EA) to afford the product **1k** as a white solid (0.647 g, 93%).

**Method C:** General procedure for **1y**.

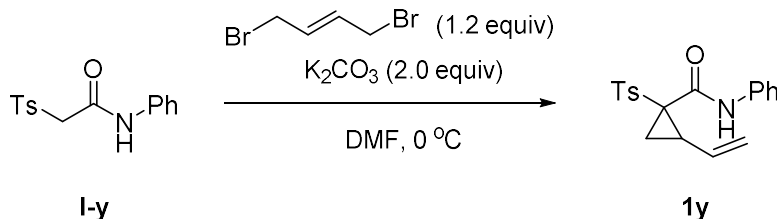

To a 100 mL round bottom flask was equipped with 40 mL DMF and added *N*-phenyl-2-tosylacetamide **I-y** (8.8 mmol, 1.0 equiv), K<sub>2</sub>CO<sub>3</sub> (2.43 g, 2.0 equiv), (*E*)-1,4-dibromobut-2-ene (2.26 g, 1.2 equiv), the mixture was stirred at 0 °C until **I-y** disappeared. After the completion of the reaction (monitored by TLC), it was quenched by water (20 mL), and extracted with dichloromethane (30 mL × 3). The combined filtrate was washed with saturated brine (30 mL × 3) and dried over with anhydrous Na<sub>2</sub>SO<sub>4</sub>. Then the residue was purified by a short flash silica gel column chromatography with PE and EA (eluent: EA/PE = 1/50) to give the desired product compounds **1y** as a white solid (1.3 g, 43%).

**Method D:** General procedure for **1aa**<sup>4</sup>.

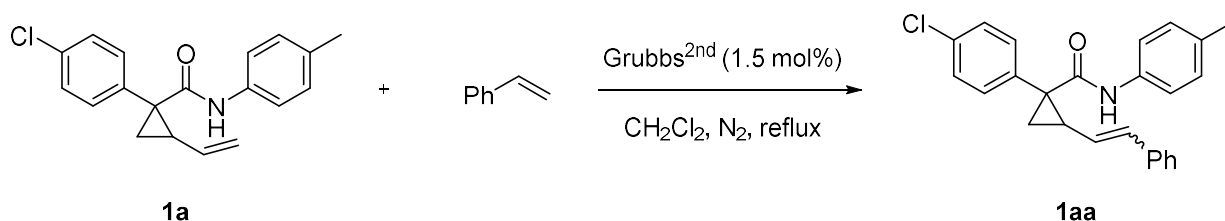

A dried round-bottom flask was charged with **1a** (5.0 mmol, 1.0 equiv) and 2<sup>nd</sup> generation Grubbs catalyst (64 mg, 1.5 mol%) under an atmosphere of dry nitrogen. CH<sub>2</sub>Cl<sub>2</sub> (0.6 M) was added followed by styrene (17.2 mL, 30.0 equiv). The flask was sealed under an atmosphere of dry nitrogen and the mixture stirred at 45 °C for 24 h. The solvent was removed under reduced pressure and the residue was purified by flash column chromatography with PE and EA (eluent: EA/PE = 1/40) to give the desired product compound **1aa** as a white solid (871 mg, 45%).

**Method E: General procedure for 1ab**

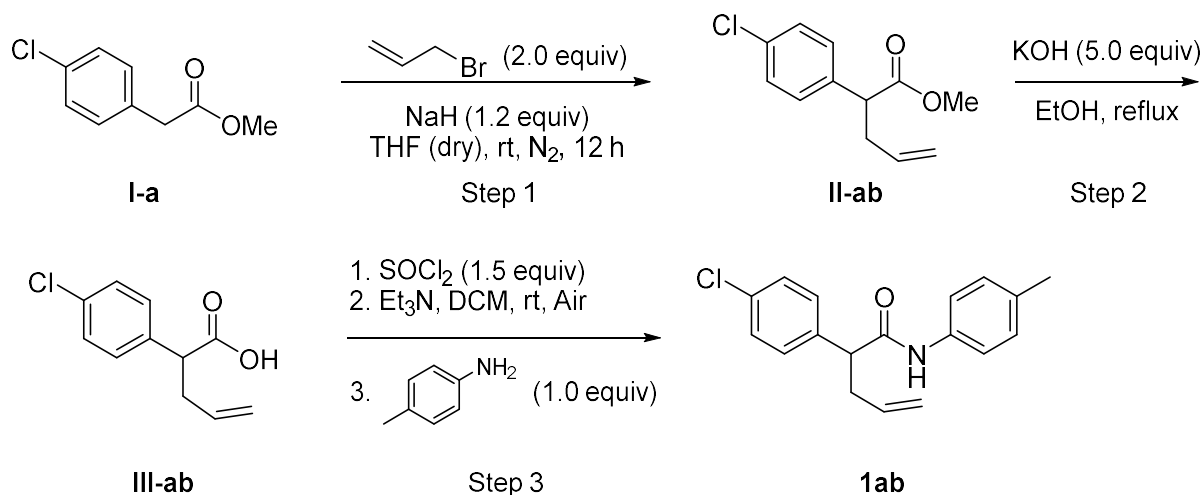

**Step 1:** To a flame-dried round-bottom flask under nitrogen atmosphere was added NaH (144 mg, 3.6 mmol, 1.2 equiv) and THF (10 mL). The mixture was cooled to 0 °C while stirring, upon which the methyl 2-(4-chlorophenyl) acetate **I-a** (0.5 mL, 3 mmol, 1.0 equiv) was added. The mixture was warmed to room temperature for 10 minutes then cooled to 0 °C again. 3-Bromoprop-1-ene (0.52 mL, 6 mmol, 2.0 equiv) was then added dropwise, and the reaction was stirred at room temperature for 12 hours. The reaction was quenched by addition of saturated aqueous NH<sub>4</sub>Cl (15 mL). The layers were separated, and the aqueous layer was extracted with ethyl acetate. The organic layers were combined, dried, filtered and concentrated to an oil.

**Step 2:** The oil was then dissolved in EtOH (10 mL), combined with KOH (842 mg, 15 mmol, 5.0 equiv) and stirred under reflux for 3 hours. The reaction was cooled to room temperature and acidified to pH 3-1 with 10% HCl. The aqueous layer was extracted with dichloromethane, and the combined organic layers were dried, filtered, and concentrated to obtain the target product **III-ab** as a white

solid.

**Step 3:** To a 50 mL round bottom flask equipped with 20 mL CH<sub>2</sub>Cl<sub>2</sub> was added **III-ab** (1.0 equiv), SOCl<sub>2</sub> (0.4 mL, 4.5 mmol, 1.5 equiv), the mixture was stirred at room temperature for 10 min, then Et<sub>3</sub>N was added dropwise to the mixture until there is no white smoke produced. After the mixture was stirred at room temperature for 2 hours, it was quenched by water (15 mL), and extracted with dichloromethane (10 mL × 3). The organic layers were washed with saturated brine (10 mL × 3), and the organic layers were dried, filtered. Then the residue was purified by a flash silica gel column chromatography (eluent: EA/PE = 1/20) to give the desired product compound **1ab** as a white solid (374 mg, 42% three steps ).

### III. X-Ray single crystal diffraction data of **2a** (CCDC NO. 2142480).

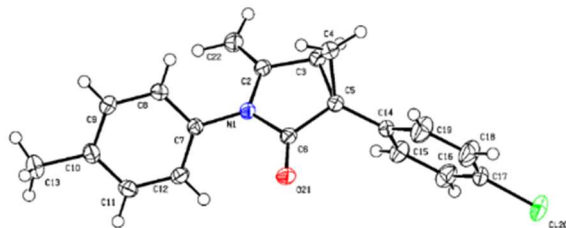

**Figure S1.** Note: Ortep drawing of **2a** with thermal ellipsoids set at 50% probability

**Table S1.** Crystal data and structure refinement for **2a**.

|                                        |                                                               |
|----------------------------------------|---------------------------------------------------------------|
| Identification code                    | <b>2a</b>                                                     |
| Empirical formula                      | C <sub>19</sub> H <sub>16</sub> ClNO                          |
| Formula weight                         | 309.78                                                        |
| Temperature/K                          | 149.99(10)                                                    |
| Crystal system                         | triclinic                                                     |
| Space group                            | P-1                                                           |
| a/Å                                    | 7.0254(3)                                                     |
| b/Å                                    | 8.4668(4)                                                     |
| c/Å                                    | 13.4722(6)                                                    |
| $\alpha$ /°                            | 82.729(4)                                                     |
| $\beta$ /°                             | 86.836(4)                                                     |
| $\gamma$ /°                            | 75.912(4)                                                     |
| Volume/Å <sup>3</sup>                  | 770.76(6)                                                     |
| Z                                      | 2                                                             |
| $\rho_{\text{calc}}/\text{cm}^3$       | 1.335                                                         |
| $\mu/\text{mm}^{-1}$                   | 2.189                                                         |
| F(000)                                 | 324.0                                                         |
| Crystal size/mm <sup>3</sup>           | 0.16 × 0.1 × 0.1                                              |
| Radiation                              | Cu K $\alpha$ ( $\lambda$ = 1.54184)                          |
| 2 $\theta$ range for data collection/° | 10.848 to 143.08                                              |
| Index ranges                           | -8 ≤ h ≤ 6, -10 ≤ k ≤ 10, -16 ≤ l ≤ 15                        |
| Reflections collected                  | 5569                                                          |
| Independent reflections                | 2917 [R <sub>int</sub> = 0.0205, R <sub>sigma</sub> = 0.0259] |
| Data/restraints/parameters             | 2917/0/208                                                    |

|                                                |                                  |
|------------------------------------------------|----------------------------------|
| Goodness-of-fit on $F^2$                       | 1.040                            |
| Final R indexes [ $I \geq 2\sigma(I)$ ]        | $R_1 = 0.0406$ , $wR_2 = 0.1053$ |
| Final R indexes [all data]                     | $R_1 = 0.0427$ , $wR_2 = 0.1067$ |
| Largest diff. peak/hole / $e \text{ \AA}^{-3}$ | 0.25/-0.43                       |

**Table S2.** Bond Lengths for **2a**.

| Atom | Atom | Length/ $\text{\AA}$ | Atom | Atom | Length/ $\text{\AA}$ |
|------|------|----------------------|------|------|----------------------|
| C120 | C17  | 1.7450(16)           | C6   | C5   | 1.5111(19)           |
| O21  | C6   | 1.2144(18)           | C5   | C3   | 1.520(2)             |
| N1   | C7   | 1.4310(18)           | C5   | C4   | 1.517(2)             |
| N1   | C2   | 1.4211(18)           | C3   | C4   | 1.508(2)             |
| N1   | C6   | 1.3837(19)           | C8   | C9   | 1.383(2)             |
| C14  | C5   | 1.489(2)             | C10  | C11  | 1.389(2)             |
| C14  | C15  | 1.389(2)             | C10  | C9   | 1.393(2)             |
| C14  | C19  | 1.385(2)             | C10  | C13  | 1.511(2)             |
| C12  | C7   | 1.384(2)             | C15  | C16  | 1.385(2)             |
| C12  | C11  | 1.391(2)             | C17  | C16  | 1.374(3)             |
| C7   | C8   | 1.391(2)             | C17  | C18  | 1.374(3)             |
| C2   | C3   | 1.480(2)             | C19  | C18  | 1.388(3)             |
| C2   | C22  | 1.325(2)             |      |      |                      |

**Table S3.** Bond Angles for **2a**.

| Atom | Atom | Atom | Angle/ $^\circ$ | Atom | Atom | Atom | Angle/ $^\circ$ |
|------|------|------|-----------------|------|------|------|-----------------|
| C2   | N1   | C7   | 122.62(12)      | C6   | C5   | C4   | 111.59(12)      |
| C6   | N1   | C7   | 124.20(12)      | C4   | C5   | C3   | 59.55(10)       |
| C6   | N1   | C2   | 113.17(12)      | C2   | C3   | C5   | 106.68(12)      |
| C15  | C14  | C5   | 119.96(14)      | C2   | C3   | C4   | 115.53(13)      |
| C19  | C14  | C5   | 121.63(14)      | C4   | C3   | C5   | 60.13(10)       |
| C19  | C14  | C15  | 118.40(14)      | C9   | C8   | C7   | 119.65(13)      |
| C7   | C12  | C11  | 119.42(13)      | C11  | C10  | C9   | 118.21(14)      |
| C12  | C7   | N1   | 121.15(13)      | C11  | C10  | C13  | 121.41(14)      |
| C12  | C7   | C8   | 120.16(13)      | C9   | C10  | C13  | 120.37(14)      |
| C8   | C7   | N1   | 118.67(12)      | C3   | C4   | C5   | 60.32(10)       |

---

|     |    |    |            |     |     |      |            |
|-----|----|----|------------|-----|-----|------|------------|
| N1  | C2 | C3 | 106.61(12) | C10 | C11 | C12  | 121.28(14) |
| C22 | C2 | N1 | 126.25(14) | C8  | C9  | C10  | 121.19(14) |
| C22 | C2 | C3 | 127.12(14) | C16 | C15 | C14  | 121.09(15) |
| O21 | C6 | N1 | 125.66(13) | C16 | C17 | C120 | 119.52(14) |
| O21 | C6 | C5 | 126.90(13) | C16 | C17 | C18  | 121.47(15) |
| N1  | C6 | C5 | 107.42(12) | C18 | C17 | C120 | 118.99(13) |
| C14 | C5 | C6 | 119.52(12) | C17 | C16 | C15  | 119.00(16) |
| C14 | C5 | C3 | 124.08(12) | C14 | C19 | C18  | 121.12(16) |
| C14 | C5 | C4 | 122.29(13) | C17 | C18 | C19  | 118.91(16) |
| C6  | C5 | C3 | 105.10(12) |     |     |      |            |

---

#### IV. Analytical data of compounds

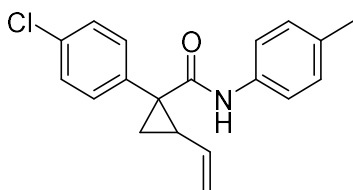

*1-(4-Chlorophenyl)-N-(p-tolyl)-2-vinylcyclopropane-1-carboxamide (1a)*. white solid. Mp = 96–98 °C.  $^1\text{H NMR}$  (600 MHz,  $\text{CDCl}_3$ )  $\delta$  7.44–7.39 (m, 4H), 7.22 (d,  $J = 7.8$  Hz, 2H), 7.06 (d,  $J = 8.4$  Hz, 2H), 6.95 (s, 1H), 6.04–5.98 (m, 1H), 5.34 (d,  $J = 16.8$  Hz, 1H), 5.13 (d,  $J = 10.8$  Hz, 1H), 2.30–2.25 (m, 4H), 2.08 (dd,  $J = 7.2, 4.8$  Hz, 1H), 1.39 (q,  $J = 4.8$  Hz, 1H).  $^{13}\text{C}\{^1\text{H}\}$  NMR (151 MHz,  $\text{CDCl}_3$ )  $\delta$  168.4, 138.9, 135.4, 135.3, 134.3, 134.1, 131.7, 129.6, 129.4, 119.9, 116.6, 38.2, 32.4, 21.4, 20.9. HRMS (ESI) (m/z) calculated for  $\text{C}_{19}\text{H}_{18}\text{ClNO}$   $[\text{M}+\text{Na}]^+$ : 334.0969, found: 334.0942.

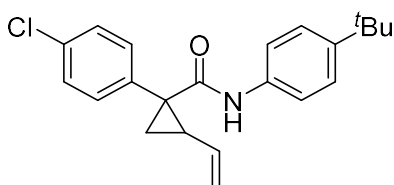

*N-(4-(Tert-butyl)phenyl)-1-(4-chlorophenyl)-2-vinylcyclopropane-1-carboxamide (1b)*. white solid. Mp = 119–122 °C.  $^1\text{H NMR}$  (600 MHz,  $\text{CDCl}_3$ )  $\delta$  7.42–7.38 (m, 4H), 7.28–7.24 (m, 4H), 6.92 (s, 1H), 6.01–5.94 (m, 1H), 5.32 (dd,  $J = 16.8, 1.2$  Hz, 1H), 5.11 (dd,  $J = 10.2, 1.2$  Hz, 1H), 2.29–2.25 (m, 1H), 2.07 (dd,  $J = 6.6, 4.2$  Hz, 1H), 1.37 (q,  $J = 4.8$  Hz, 1H), 1.26 (s, 9H).  $^{13}\text{C}\{^1\text{H}\}$  NMR (151 MHz,  $\text{CDCl}_3$ )  $\delta$  168.4, 147.6, 139.0, 135.4, 135.3, 134.3, 131.7, 129.7, 125.8, 119.7, 116.7, 38.2, 34.5, 32.4, 31.5, 21.4. HRMS (ESI) (m/z) calculated for  $\text{C}_{22}\text{H}_{24}\text{ClNO}$   $[\text{M}+\text{Na}]^+$ : 376.1439, found: 376.1434.

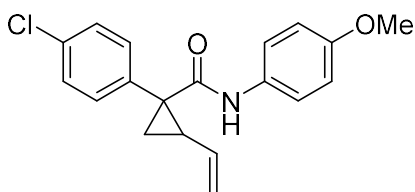

*1-(4-Chlorophenyl)-N-(4-methoxyphenyl)-2-vinylcyclopropane-1-carboxamide (1c)*. white solid. Mp = 100–102 °C.  $^1\text{H NMR}$  (600 MHz,  $\text{CDCl}_3$ )  $\delta$  7.43–7.39 (m, 4H), 7.24–7.22 (m, 2H), 6.87 (s, 1H), 6.80–6.78 (m, 2H), 6.04–5.98 (m, 1H), 5.33 (dd,  $J = 17.4, 1.2$  Hz, 1H), 5.12 (dd,  $J = 10.2, 1.8$  Hz, 1H), 3.76 (s, 3H), 2.26 (dd,  $J = 16.1, 9.0$  Hz, 1H), 2.07 (dd,  $J = 7.2, 4.8$  Hz, 1H), 1.38 (q,  $J = 4.2$  Hz, 1H).  $^{13}\text{C}\{^1\text{H}\}$  NMR (150 MHz,  $\text{CDCl}_3$ )  $\delta$  168.4, 156.6, 139.0, 135.5, 134.3, 131.8, 131.0, 129.7, 121.9, 116.6, 114.1, 55.6, 38.1, 32.5, 21.4. HRMS (ESI) (m/z) calculated for  $\text{C}_{19}\text{H}_{18}\text{ClNO}_2$   $[\text{M}+\text{Na}]^+$ : 350.0918, found: 350.0919.

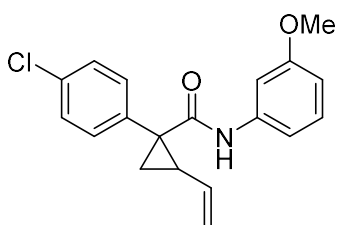

*1-(4-Chlorophenyl)-N-(3-methoxyphenyl)-2-vinylcyclopropane-1-carboxamide (1d)*. white solid. Mp = 67–69 °C.  $^1\text{H NMR}$  (400 MHz,  $\text{CDCl}_3$ )  $\delta$  7.44–7.39 (m, 4H), 7.15 (t,  $J = 2.4$  Hz, 1H), 7.12 (d,  $J = 8.4$  Hz, 1H), 6.97 (s, 1H), 6.75 (dd,  $J = 8.0, 1.2$  Hz, 1H), 6.63–6.60 (m, 1H), 6.04–5.94 (m, 1H), 5.34 (dd,  $J = 17.2, 1.2$  Hz, 1H), 5.13 (dd,  $J = 10.0, 1.6$  Hz, 1H), 3.77 (s, 3H), 2.31–2.25 (m, 1H), 2.08 (dd,  $J = 6.8, 4.4$  Hz, 1H), 1.39 (q,  $J = 4.4$  Hz, 1H).  $^{13}\text{C}\{^1\text{H}\}$  NMR (101 MHz,  $\text{CDCl}_3$ )  $\delta$  168.5, 160.3, 139.1, 138.8, 135.3, 134.4, 131.7, 129.8, 129.7, 116.8, 111.9, 110.4, 105.5, 55.5, 38.3, 32.6, 21.5. **HRMS** (ESI) (m/z) calculated for  $\text{C}_{19}\text{H}_{18}\text{ClNO}_2$   $[\text{M}+\text{Na}]^+$ : 350.0918, found: 350.0914.

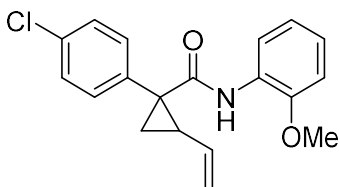

*1-(4-Chlorophenyl)-N-(2-methoxyphenyl)-2-vinylcyclopropane-1-carboxamide (1e)*. white solid. Mp = 98–99 °C.  $^1\text{H NMR}$  (600 MHz,  $\text{CDCl}_3$ )  $\delta$  8.31 (d,  $J = 8.4$  Hz, 1H), 7.80 (s, 1H), 7.42 (dd,  $J = 19.2, 8.4$  Hz, 4H), 6.99–6.96 (m, 1H), 6.91 (t,  $J = 7.8$  Hz, 1H), 6.75 (d,  $J = 7.8$  Hz, 1H), 6.08–6.01 (m, 1H), 5.33 (d,  $J = 17.4$  Hz, 1H), 5.12 (d,  $J = 10.2$  Hz, 1H), 3.63 (s, 3H), 2.27 (q,  $J = 8.4$  Hz, 1H), 2.08 (t,  $J = 5.4$  Hz, 1H), 1.43 (q,  $J = 4.8$  Hz, 1H).  $^{13}\text{C}\{^1\text{H}\}$  NMR (151 MHz,  $\text{CDCl}_3$ )  $\delta$  168.3, 147.8, 139.0, 135.5, 134.1, 131.9, 129.4, 127.9, 123.7, 121.2, 119.2, 116.5, 110.0, 55.8, 38.6, 32.7, 21.1. **HRMS** (ESI) (m/z) calculated for  $\text{C}_{19}\text{H}_{18}\text{ClNO}_2$   $[\text{M}+\text{Na}]^+$ : 350.0918, found: 350.0911.

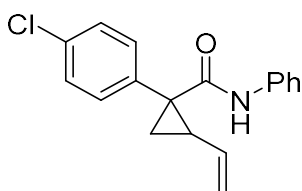

*1-(4-Chlorophenyl)-N-phenyl-2-vinylcyclopropane-1-carboxamide (1f)*. white solid. Mp = 87–89 °C.  $^1\text{H NMR}$  (600 MHz,  $\text{CDCl}_3$ )  $\delta$  7.44–7.40 (m, 4H), 7.33 (d,  $J = 8.4$  Hz, 2H), 7.26 (t,  $J = 7.8$  Hz, 2H), 7.06 (t,  $J = 7.2$  Hz, 1H), 6.98 (s, 1H), 6.04–5.98 (m, 1H), 5.34 (d,  $J = 17.4$  Hz, 1H), 5.13 (d,  $J = 10.2$  Hz, 1H), 2.28 (q,  $J = 8.4$  Hz, 1H), 2.09 (dd,  $J = 7.2, 4.8$  Hz, 1H), 1.40 (q,  $J = 4.2$  Hz, 1H).  $^{13}\text{C}\{^1\text{H}\}$  NMR (151 MHz,  $\text{CDCl}_3$ )  $\delta$  168.5, 138.9, 137.8, 135.3, 134.4, 131.8, 129.7, 129.0, 124.5, 119.9, 116.8, 38.2, 32.6, 21.5. **HRMS** (ESI) (m/z) calculated for  $\text{C}_{18}\text{H}_{16}\text{ClNO}$   $[\text{M}+\text{Na}]^+$ : 320.0813, found: 320.0811.



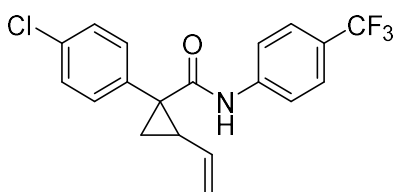

*1-(4-Chlorophenyl)-N-(4-(trifluoromethyl)phenyl)-2-vinylcyclopropane-1-carboxamide (1g)*. white solid. Mp = 101–103 °C.  $^1\text{H NMR}$  (600 MHz,  $\text{CDCl}_3$ )  $\delta$  7.50 (d,  $J = 9.0$  Hz, 2H), 7.46 (d,  $J = 9.0$  Hz, 2H), 7.45–7.41 (m, 4H), 7.11 (s, 1H), 6.00–5.94 (m, 1H), 5.36 (dd,  $J = 17.4, 1.2$  Hz, 1H), 5.15 (dd,  $J = 10.2, 1.8$  Hz, 1H), 2.34–2.30 (m, 1H), 2.10 (dd,  $J = 7.2, 4.8$  Hz, 1H), 1.43 (q,  $J = 4.8$  Hz, 1H).  $^{13}\text{C}\{^1\text{H}\}$  NMR (151 MHz,  $\text{CDCl}_3$ ) 168.8, 140.8, 138.3, 134.9, 134.7, 131.8, 129.9, 126.22 (q,  $J_{\text{C-F}} = 3.0$  Hz), 126.17 (q,  $J_{\text{C-F}} = 33.2$  Hz), 124.1 (q,  $J_{\text{C-F}} = 271.8$  Hz), 119.4, 117.2, 38.3, 32.9, 21.7.  $^{19}\text{F NMR}$  (565 MHz,  $\text{CDCl}_3$ )  $\delta$  -62.15. HRMS (ESI) (m/z) calculated for  $\text{C}_{19}\text{H}_{15}\text{ClF}_3\text{NO}$   $[\text{M}+\text{Na}]^+$ : 388.0686, found: 388.0679.

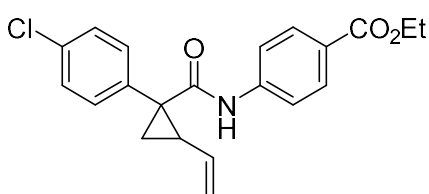

*Ethyl-4-(1-(4-chlorophenyl)-2-vinylcyclopropane-1-carboxamido)benzoate (1h)*. white solid. Mp = 117–118 °C.  $^1\text{H NMR}$  (600 MHz,  $\text{CDCl}_3$ )  $\delta$  7.93 (d,  $J = 8.4$  Hz, 2H), 7.44–7.40 (m, 6H), 7.12 (s, 1H), 6.02–5.96 (m, 1H), 5.35 (dd,  $J = 17.4, 1.2$  Hz, 1H), 5.15 (dd,  $J = 10.2, 1.8$  Hz, 1H), 4.34 (q,  $J = 7.2$  Hz, 2H), 2.31 (dd,  $J = 16.2, 9.0$  Hz, 1H), 2.10 (dd,  $J = 6.6, 4.2$  Hz, 1H), 1.43 (q,  $J = 4.2$  Hz, 1H), 1.37 (t,  $J = 7.2$  Hz, 3H).  $^{13}\text{C}\{^1\text{H}\}$  NMR (150 MHz,  $\text{CDCl}_3$ )  $\delta$  168.8, 166.2, 141.8, 138.4, 135.0, 134.7, 131.8, 130.8, 129.9, 126.2, 118.8, 117.2, 61.0, 38.4, 33.0, 21.7, 14.5. HRMS (ESI) (m/z) calculated for  $\text{C}_{21}\text{H}_{20}\text{ClNO}_3$   $[\text{M}+\text{Na}]^+$ : 392.1024, found: 392.1017.

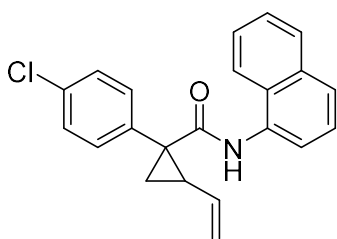

*1-(4-Chlorophenyl)-N-(naphthalen-1-yl)-2-vinylcyclopropane-1-carboxamide (1i)*. white solid. Mp = 103–104 °C.  $^1\text{H NMR}$  (600 MHz,  $\text{CDCl}_3$ )  $\delta$  7.93 (d,  $J = 7.2$  Hz, 1H), 7.81 (d,  $J = 7.8$  Hz, 1H), 7.64 (d,  $J = 8.4$  Hz, 1H), 7.58 (d,  $J = 8.4$  Hz, 2H), 7.49 (d,  $J = 8.4$  Hz, 2H), 7.45–7.39 (m, 4H), 7.21 (d,  $J = 7.8$  Hz, 1H), 6.13–6.06 (m, 1H), 5.40 (dd,  $J = 16.8, 1.2$  Hz, 1H), 5.17 (dd,  $J = 10.2, 1.8$  Hz, 1H), 2.37 (dd,  $J = 16.2, 9.0$  Hz, 1H), 2.17 (dd,  $J = 7.2, 4.8$  Hz, 1H), 1.48 (q,  $J = 4.8$  Hz, 1H).  $^{13}\text{C}\{^1\text{H}\}$  NMR (151 MHz,  $\text{CDCl}_3$ )  $\delta$  169.1, 139.1, 135.4, 134.6, 134.1, 132.4, 132.0, 129.9, 128.9, 126.9, 126.5, 126.0, 125.83, 125.75, 120.3, 120.1, 116.8, 38.4, 32.8, 21.5. HRMS (ESI) (m/z) calculated for  $\text{C}_{22}\text{H}_{18}\text{ClNO}$   $[\text{M}+\text{Na}]^+$ : 370.0969, found: 370.0965.

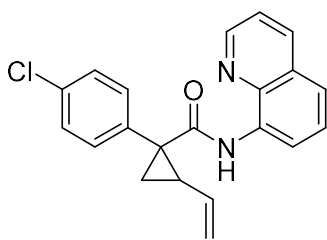

*1-(4-Chlorophenyl)-N-(quinolin-8-yl)-2-vinylcyclopropane-1-carboxamide (1j)*. white solid. Mp = 113–114 °C.  $^1\text{H NMR}$  (600 MHz,  $\text{CDCl}_3$ )  $\delta$  9.93 (s, 1H), 8.70 (dd,  $J = 7.8, 1.2$  Hz, 1H), 8.55 (dd,  $J = 4.2, 1.8$  Hz, 1H), 8.07 (dd,  $J = 8.4, 1.8$  Hz, 1H), 7.54–7.52 (m, 2H), 7.48 (t,  $J = 8.4$  Hz, 1H), 7.46–7.43 (m, 3H), 7.35 (q,  $J = 4.2$  Hz, 1H), 6.09–6.03 (m, 1H), 5.35 (dd,  $J = 16.8, 1.2$  Hz, 1H), 5.11 (dd,  $J = 10.2, 1.8$  Hz, 1H), 2.36–2.32 (m, 1H), 2.14 (dd,  $J = 7.2, 4.8$  Hz, 1H), 1.49 (q,  $J = 4.8$  Hz, 1H).  $^{13}\text{C}\{^1\text{H}\}$  NMR (151 MHz,  $\text{CDCl}_3$ )  $\delta$  168.9, 148.3, 139.0, 138.6, 136.2, 135.6, 134.7, 134.1, 132.1, 129.5, 127.9, 127.4, 121.60, 121.55, 116.6, 115.9, 39.0, 32.8, 21.2. HRMS (ESI) ( $m/z$ ) calculated for  $\text{C}_{21}\text{H}_{17}\text{ClN}_2\text{O}$   $[\text{M}+\text{Na}]^+$ : 371.0922, found: 371.0916.

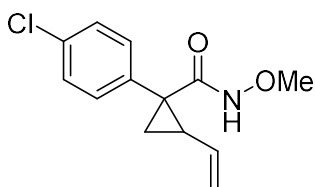

*1-(4-Chlorophenyl)-N-methoxy-2-vinylcyclopropane-1-carboxamide (1k)*. white solid. Mp = 82–85 °C.  $^1\text{H NMR}$  (400 MHz,  $\text{CDCl}_3$ )  $\delta$  7.84 (s, 1H), 7.35–7.30 (m, 4H), 5.97–5.88 (m, 1H), 5.30 (dd,  $J = 17.2, 1.6$  Hz, 1H), 5.12 (dd,  $J = 10.0, 1.6$  Hz, 1H), 3.64 (s, 3H), 2.18 (dd,  $J = 16.4, 8.8$  Hz, 1H), 1.99 (dd, 6.8, 4.4 Hz, 1H), 1.31 (q,  $J = 4.4$  Hz, 1H).  $^{13}\text{C}\{^1\text{H}\}$  NMR (101 MHz,  $\text{CDCl}_3$ )  $\delta$  168.9, 137.9, 134.9, 134.3, 133.3, 131.6, 129.5, 116.8, 64.7, 35.5, 32.3, 21.1. HRMS (ESI) ( $m/z$ ) calculated for  $\text{C}_{13}\text{H}_{14}\text{ClNO}_2$   $[\text{M}+\text{Na}]^+$ : 274.0605, found: 274.0604.

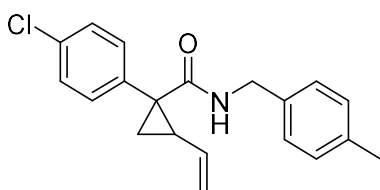

*1-(4-Chlorophenyl)-N-(4-methylbenzyl)-2-vinylcyclopropane-1-carboxamide (1l)*. white solid. Mp = 84–86 °C.  $^1\text{H NMR}$  (600 MHz,  $\text{CDCl}_3$ )  $\delta$  7.35–7.31 (m, 4H), 7.08 (d,  $J = 7.8$  Hz, 2H), 7.01 (d,  $J = 7.8$  Hz, 2H), 6.03–5.97 (m, 1H), 5.56 (s, 1H), 5.31 (dd,  $J = 16.8, 1.2$  Hz, 1H), 5.13 (dd,  $J = 10.2, 1.8$  Hz, 1H), 4.39 (dd,  $J = 15.0, 6.0$  Hz, 1H), 4.29 (dd,  $J = 15.0, 5.4$  Hz, 1H), 2.31 (s, 3H), 2.21–2.17 (m, 1H), 2.04 (dd,  $J = 6.6, 4.2$  Hz, 1H), 1.32 (q,  $J = 4.2$  Hz, 1H).  $^{13}\text{C}\{^1\text{H}\}$  NMR (151 MHz,  $\text{CDCl}_3$ )  $\delta$  170.3, 139.3, 137.1, 135.8, 135.3, 134.0, 131.7, 129.5, 129.4, 127.4, 116.3, 43.8, 37.5, 32.0, 21.2, 21.1. HRMS (ESI) ( $m/z$ ) calculated for  $\text{C}_{20}\text{H}_{20}\text{ClNO}$   $[\text{M}+\text{Na}]^+$ : 348.1126, found: 348.1125.

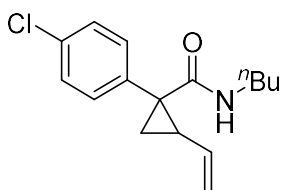

*N*-Butyl-1-(4-chlorophenyl)-2-vinylcyclopropane-1-carboxamide (**1m**). yellow solid. Mp = 32–34 °C. <sup>1</sup>H NMR (400 MHz, CDCl<sub>3</sub>) δ 7.36–7.31 (m, 4H), 6.01–5.91 (m, 1H), 5.28 (dd, *J* = 17.2, 1.6 Hz, 1H), 5.24 (s, 1H), 5.09 (dd, *J* = 10.4, 1.6 Hz, 1H), 3.20–3.11 (m, 2H), 2.18–2.12 (m, 1H), 1.98 (dd, *J* = 6.8, 4.4 Hz, 1H), 1.37–1.32 (m, 2H), 1.28 (q, *J* = 4.4 Hz, 1H), 1.20 (dd, *J* = 15.2, 7.2 Hz, 2H), 0.85 (t, *J* = 7.2 Hz, 3H). <sup>13</sup>C{<sup>1</sup>H} NMR (101 MHz, CDCl<sub>3</sub>) δ 170.2, 139.6, 135.9, 133.9, 131.7, 129.4, 116.0, 40.0, 37.5, 31.8, 21.0, 20.1, 13.8. HRMS (ESI) (*m/z*) calculated for C<sub>16</sub>H<sub>20</sub>ClNO [M+Na]<sup>+</sup>: 300.1126, found: 300.1125.

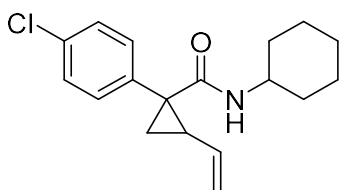

1-(4-Chlorophenyl)-*N*-cyclohexyl-2-vinylcyclopropane-1-carboxamide (**1n**). white solid. Mp = 74 – 76 °C. <sup>1</sup>H NMR (600 MHz, CDCl<sub>3</sub>) δ 7.31–7.27 (m, 4H), 5.93–5.87 (m, 1H), 5.25 (dd, *J* = 17.4, 1.8 Hz, 1H), 5.11 (d, *J* = 7.8 Hz, 1H), 5.05 (dd, *J* = 10.2, 1.2 Hz, 1H), 3.71–3.64 (m, 1H), 2.13–2.09 (m, 1H), 1.92 (dd, *J* = 7.2, 4.8 Hz, 1H), 1.77–1.71 (m, 2H), 1.56–1.48 (m, 3H), 1.31–1.22 (m, 3H), 1.08–1.01 (m, 1H), 0.98–0.87 (m, 2H). <sup>13</sup>C{<sup>1</sup>H} NMR (151 MHz, CDCl<sub>3</sub>) δ 169.2, 139.5, 135.8, 133.7, 131.3, 129.2, 115.9, 48.7, 37.4, 33.1, 32.8, 31.5, 25.5, 24.72, 24.70, 20.8. HRMS (ESI) (*m/z*) calculated for C<sub>18</sub>H<sub>22</sub>ClNO [M+Na]<sup>+</sup>: 326.1282, found: 326.1283.

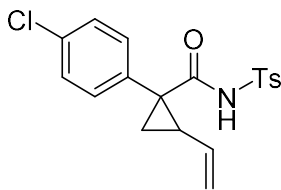

1-(4-Chlorophenyl)-*N*-tosyl-2-vinylcyclopropane-1-carboxamide (**1o**). white solid. Mp = 147–149 °C. <sup>1</sup>H NMR (400 MHz, CDCl<sub>3</sub>) δ 7.84 (d, *J* = 8.4 Hz, 2H), 7.36 (d, *J* = 8.4 Hz, 2H), 7.31 (d, *J* = 8.4 Hz, 2H), 7.27–7.25 (m, 2H), 5.60–5.51 (m, 1H), 5.25 (dd, *J* = 17.2, 1.2 Hz, 1H), 5.00 (dd, *J* = 10.4, 1.2 Hz, 1H), 2.45 (s, 3H), 2.26 (dd, *J* = 16.4, 8.8 Hz, 1H), 1.91 (dd, *J* = 7.2, 4.8 Hz, 1H), 1.32 (dd, *J* = 8.8, 4.8 Hz, 1H). <sup>13</sup>C{<sup>1</sup>H} NMR (101 MHz, CDCl<sub>3</sub>) δ 168.0, 145.2, 136.6, 135.5, 135.1, 133.5, 131.5, 130.0, 129.6, 128.6, 117.9, 37.8, 33.6, 21.9, 21.8. HRMS (ESI) (*m/z*) calculated for C<sub>19</sub>H<sub>18</sub>ClNO<sub>3</sub>S [M+Na]<sup>+</sup>: 398.0588, found: 398.0585.

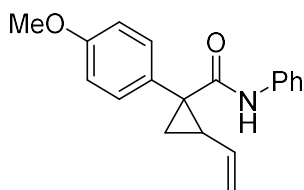

*1-(4-Methoxyphenyl)-N-phenyl-2-vinylcyclopropane-1-carboxamide (1p)*. white solid. Mp = 90–92 °C.  $^1\text{H NMR}$  (400 MHz,  $\text{CDCl}_3$ )  $\delta$  7.42–7.39 (m, 2H), 7.34–7.32 (m, 2H), 7.26–7.22 (m, 2H), 7.10 (s, 1H), 7.06–7.02 (m, 1H), 6.97–6.93 (m, 2H), 6.11–6.02 (m, 1H), 5.33 (dd,  $J = 17.2, 1.6$  Hz, 1H), 5.11 (dd,  $J = 10.0, 1.6$  Hz, 1H), 3.85 (s, 3H), 2.31–2.25 (m, 1H), 2.06 (dd,  $J = 6.8, 4.0$  Hz, 1H), 1.40 (q,  $J = 4.4$  Hz, 1H).  $^{13}\text{C}\{^1\text{H}\}$  NMR (101 MHz,  $\text{CDCl}_3$ )  $\delta$  169.6, 159.6, 138.1, 135.9, 132.3, 131.7, 129.0, 124.2, 119.7, 116.2, 114.9, 55.5, 38.1, 32.9, 21.6. HRMS (ESI) (m/z) calculated for  $\text{C}_{19}\text{H}_{19}\text{NO}_2$   $[\text{M}+\text{Na}]^+$ : 316.1308, found: 316.1307.

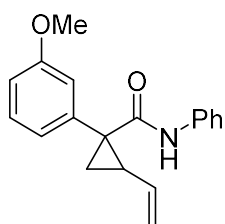

*1-(3-Methoxyphenyl)-N-phenyl-2-vinylcyclopropane-1-carboxamide (1q)*. white solid. Mp = 86–98 °C.  $^1\text{H NMR}$  (600 MHz,  $\text{CDCl}_3$ )  $\delta$  7.36–7.33 (m, 3H), 7.25 (t,  $J = 7.8$  Hz, 2H), 7.15 (s, 1H), 7.08 (d,  $J = 7.8$  Hz, 1H), 7.04 (t,  $J = 7.8$  Hz, 1H), 7.00 (t,  $J = 1.8$  Hz, 1H), 6.91 (dd,  $J = 8.4, 2.4$  Hz, 1H), 6.06–6.00 (m, 1H), 5.34 (dd,  $J = 17.4, 1.8$  Hz, 1H), 5.11 (dd,  $J = 10.2, 1.2$  Hz, 1H), 3.84 (s, 3H), 2.32 (dd,  $J = 16.2, 9.0$  Hz, 1H), 2.07 (dd,  $J = 7.2, 4.8$  Hz, 1H), 1.44 (q,  $J = 4.2$  Hz, 1H).  $^{13}\text{C}\{^1\text{H}\}$  NMR (151 MHz,  $\text{CDCl}_3$ )  $\delta$  168.9, 160.3, 141.9, 138.0, 135.7, 130.6, 129.0, 124.3, 122.6, 119.8, 116.4, 116.1, 113.8, 55.5, 39.0, 32.6, 21.3. HRMS (ESI) (m/z) calculated for  $\text{C}_{19}\text{H}_{19}\text{NO}_2$   $[\text{M}+\text{Na}]^+$ : 316.1308, found: 316.1308.

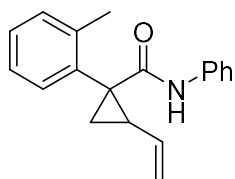

*N-phenyl-1-(o-tolyl)-2-vinylcyclopropane-1-carboxamide (1r)*. white solid. Mp = 92–94 °C.  $^1\text{H NMR}$  (600 MHz,  $\text{CDCl}_3$ )  $\delta$  7.44–7.43 (m, 1H), 7.38–7.28 (m, 5H), 7.24 (t,  $J = 7.8$  Hz, 2H), 7.05 (d,  $J = 7.8$  Hz, 1H), 7.03 (d,  $J = 4.8$  Hz, 1H), 6.16–6.09 (m, 1H), 5.36 (d,  $J = 17.4$  Hz, 1H), 5.14 (d,  $J = 10.2$  Hz, 1H), 2.39 (s, 3H), 2.34–2.29 (m, 1H), 2.18 (dd,  $J = 6.6, 4.2$  Hz, 1H), 1.38 (q,  $J = 4.2$  Hz, 1H).  $^{13}\text{C}\{^1\text{H}\}$  NMR (151 MHz,  $\text{CDCl}_3$ )  $\delta$  169.1, 139.6, 138.3, 138.0, 135.8, 131.3, 130.7, 129.0, 128.7, 127.0, 124.4, 120.0, 116.5, 37.6, 33.8, 22.0, 19.7. HRMS (ESI) (m/z) calculated for  $\text{C}_{19}\text{H}_{19}\text{NO}$   $[\text{M}+\text{Na}]^+$ : 300.1359, found: 300.1359.

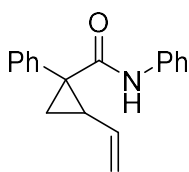

*N,1-Diphenyl-2-vinylcyclopropane-1-carboxamide (1s)*. white solid. Mp = 77–78 °C.  $^1\text{H NMR}$  (400 MHz,  $\text{CDCl}_3$ )  $\delta$  7.50–7.48 (m, 2H), 7.45–7.41 (m, 2H), 7.39–7.37 (m, 1H), 7.33–7.30 (m, 2H), 7.25–7.22 (m, 2H), 7.06–7.02 (m, 2H), 6.09–6.00 (m, 1H), 5.34 (dd,  $J = 17.2, 1.6$  Hz, 1H), 5.12 (dd,  $J = 10.4, 2.0$  Hz, 1H), 2.36–2.29 (m, 1H), 2.09 (dd,  $J = 7.2, 4.4$  Hz, 1H), 1.44 (q,  $J = 4.8$  Hz, 1H).  $^{13}\text{C}\{^1\text{H}\}$  NMR (101 MHz,  $\text{CDCl}_3$ )  $\delta$  169.1, 140.4, 138.0, 135.8, 130.5, 129.6, 129.0, 128.5, 124.3, 119.8, 116.4, 38.9, 32.6, 21.4. HRMS (ESI) (m/z) calculated for  $\text{C}_{18}\text{H}_{17}\text{NO}$   $[\text{M}+\text{Na}]^+$ : 286.1202, found: 286.1201.

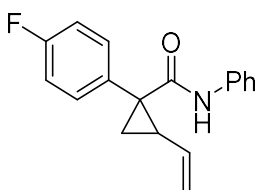

*1-(4-Fluorophenyl)-N-phenyl-2-vinylcyclopropane-1-carboxamide (1t)*. white solid. Mp = 71–73 °C.  $^1\text{H NMR}$  (400 MHz,  $\text{CDCl}_3$ )  $\delta$  7.52–7.48 (m, 2H), 7.36–7.34 (m, 2H), 7.30–7.28 (m, 2H), 7.18–7.13 (m, 2H), 7.11–7.07 (m, 1H), 7.02 (s, 1H), 6.10–6.01 (m, 1H), 5.37 (dd,  $J = 16.8, 1.2$  Hz, 1H), 5.16 (dd,  $J = 10.4, 1.6$  Hz, 1H), 2.35–2.29 (m, 1H), 2.11 (dd,  $J = 7.2, 4.8$  Hz, 1H), 1.43 (q,  $J = 4.4$  Hz, 1H).  $^{13}\text{C}\{^1\text{H}\}$  NMR (101 MHz,  $\text{CDCl}_3$ )  $\delta$  168.9, 162.6 (d,  $J_{\text{C-F}} = 249.5$  Hz), 137.9, 136.2 (d,  $J_{\text{C-F}} = 3.0$  Hz), 135.5, 132.2 (d,  $J_{\text{C-F}} = 8.1$  Hz), 129.0, 124.5, 119.8, 116.5 (d,  $J_{\text{C-F}} = 22.2$  Hz), 38.1, 32.8, 21.5.  $^{19}\text{F}$  NMR (565 MHz,  $\text{CDCl}_3$ )  $\delta$  -112.8. HRMS (ESI) (m/z) calculated for  $\text{C}_{18}\text{H}_{16}\text{FNO}$   $[\text{M}+\text{Na}]^+$ : 304.1108, found: 304.1107.

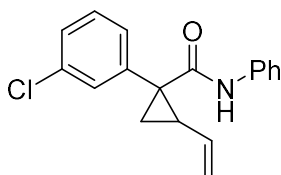

*1-(3-Chlorophenyl)-N-phenyl-2-vinylcyclopropane-1-carboxamide (1u)*. white solid. Mp = 84–86 °C.  $^1\text{H NMR}$  (400 MHz,  $\text{CDCl}_3$ )  $\delta$  7.42 (d,  $J = 0.8$  Hz, 1H), 7.35–7.29 (m, 5H), 7.19 (t,  $J = 8.4$  Hz, 2H), 7.04–6.99 (m, 2H), 5.99–5.90 (m, 1H), 5.32 (d,  $J = 17.2$  Hz, 1H), 5.09 (dd,  $J = 10.4, 0.8$  Hz, 1H), 2.29–2.23 (m, 1H), 2.03 (dd,  $J = 7.2, 4.8$  Hz, 1H), 1.35 (q,  $J = 4.8$  Hz, 1H).  $^{13}\text{C}\{^1\text{H}\}$  NMR (101 MHz,  $\text{CDCl}_3$ )  $\delta$  168.0, 142.2, 137.7, 135.1, 135.0, 130.6, 130.1, 128.8, 128.5, 128.3, 124.4, 119.9, 116.7, 38.4, 32.1, 21.2. HRMS (ESI) (m/z) calculated for  $\text{C}_{18}\text{H}_{16}\text{ClNO}$   $[\text{M}+\text{Na}]^+$ : 320.0813, found: 320.0811.

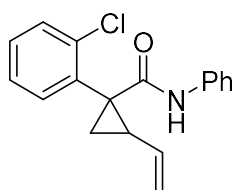

*1-(2-Chlorophenyl)-N-phenyl-2-vinylcyclopropane-1-carboxamide (1v)*. white solid. Mp = 95–97 °C.  $^1\text{H NMR}$  (600 MHz,  $\text{CDCl}_3$ )  $\delta$  7.54–7.53 (m, 1H), 7.49–7.48 (m, 1H), 7.37–7.32 (m, 4H), 7.26–7.23 (m, 2H), 7.06–7.04 (m, 2H), 6.07–6.00 (m, 1H), 5.38 (dd,  $J = 17.4, 1.8$  Hz, 1H), 5.15 (dd,  $J = 10.2, 1.2$  Hz, 1H), 2.31 (dd,  $J = 16.8, 9.0$  Hz, 1H), 2.22 (dd,  $J = 7.2, 4.8$  Hz, 1H), 1.43 (q,  $J = 4.8$  Hz, 1H).  $^{13}\text{C}\{^1\text{H}\}$  NMR (151 MHz,  $\text{CDCl}_3$ )  $\delta$  167.8, 137.97, 137.95, 136.8, 135.3, 132.7, 130.7, 129.9, 129.0, 127.8, 124.5, 120.2, 117.0, 37.7, 33.7, 22.1. HRMS (ESI) (m/z) calculated for  $\text{C}_{18}\text{H}_{16}\text{ClNO}$   $[\text{M}+\text{Na}]^+$ : 320.0813, found: 320.0812.

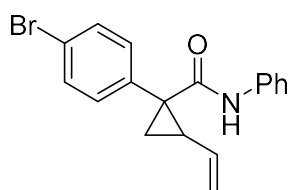

*1-(4-Bromophenyl)-N-phenyl-2-vinylcyclopropane-1-carboxamide (1w)*. white solid. Mp = 90–92 °C.  $^1\text{H NMR}$  (400 MHz,  $\text{CDCl}_3$ )  $\delta$  7.59 (d,  $J = 8.4$  Hz, 2H), 7.38 (dd,  $J = 14.0, 8.4$  Hz, 4H), 7.29 (d,  $J = 7.2$  Hz, 2H), 7.09 (t,  $J = 7.2$  Hz, 1H), 7.00 (s, 1H), 6.07–5.98 (m, 1H), 5.36 (dd,  $J = 16.8, 0.8$  Hz, 1H), 5.15 (dd,  $J = 10.4, 1.2$  Hz, 1H), 2.31 (dd,  $J = 16.4, 8.8$  Hz, 1H), 2.11 (dd,  $J = 6.8, 4.8$  Hz, 1H), 1.42 (q,  $J = 4.4$  Hz, 1H).  $^{13}\text{C}\{^1\text{H}\}$  NMR (101 MHz,  $\text{CDCl}_3$ )  $\delta$  168.4, 139.4, 137.8, 135.3, 132.7, 132.1, 129.0, 124.5, 122.5, 119.9, 116.8, 38.3, 32.5, 21.4. HRMS (ESI) (m/z) calculated for  $\text{C}_{18}\text{H}_{16}\text{BrNO}$   $[\text{M}+\text{Na}]^+$ : 364.0307, found: 364.0306.

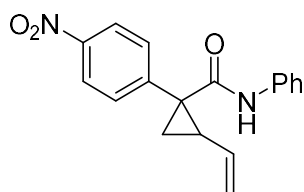

*1-(4-Nitrophenyl)-N-phenyl-2-vinylcyclopropane-1-carboxamide (1x)*. white solid. Mp = 115–117 °C.  $^1\text{H NMR}$  (400 MHz,  $\text{CDCl}_3$ )  $\delta$  8.32 (dd,  $J = 6.8, 2.0$  Hz, 2H), 7.62 (dd,  $J = 6.8, 2.0$  Hz, 2H), 7.31–7.24 (m, 4H), 7.08 (t,  $J = 7.2$  Hz, 1H), 6.77 (s, 1H), 5.27 (dd,  $J = 16.8, 0.8$  Hz, 1H), 5.02 (dd,  $J = 10.4, 1.6$  Hz, 1H), 4.89–4.80 (m, 1H), 2.83–2.77 (m, 1H), 2.10 (q,  $J = 4.4$  Hz, 1H), 1.38 (dd,  $J = 6.4, 4.4$  Hz, 1H).  $^{13}\text{C}\{^1\text{H}\}$  NMR (101 MHz,  $\text{CDCl}_3$ )  $\delta$  169.5, 148.0, 143.6, 137.5, 136.1, 133.2, 129.1, 124.9, 124.5, 120.0, 117.7, 37.3, 31.4, 22.5. HRMS (ESI) (m/z) calculated for  $\text{C}_{18}\text{H}_{16}\text{N}_2\text{O}_3$   $[\text{M}+\text{Na}]^+$ : 331.1053, found: 331.1050.

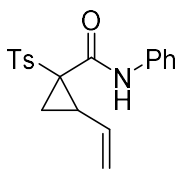

*N*-Phenyl-1-tosyl-2-vinylcyclopropane-1-carboxamide (**1y**). white solid. Mp = 140–142 °C.  $^1\text{H NMR}$  (600 MHz,  $\text{CDCl}_3$ )  $\delta$  9.26 (s, 1H), 7.71 (d,  $J = 8.4$  Hz, 2H), 7.50 (dd,  $J = 8.4, 0.6$  Hz, 2H), 7.35–7.33 (m, 2H), 7.31 (d,  $J = 8.4$  Hz, 2H), 7.15 (t,  $J = 9.0$  Hz, 1H), 5.47–5.45 (m, 2H), 5.23–5.21 (m, 1H), 3.13–3.09 (m, 1H), 2.41 (s, 3H), 2.03 (dd,  $J = 7.2, 5.4$  Hz, 1H), 1.82 (dd,  $J = 9.6, 5.4$  Hz, 1H).  $^{13}\text{C}\{^1\text{H}\}$  NMR (101 MHz,  $\text{CDCl}_3$ )  $\delta$  145.7, 131.6, 130.4, 129.3, 128.0, 125.1, 120.7, 120.2, 52.6, 30.1, 21.8, 17.9. HRMS (ESI) (m/z) calculated for  $\text{C}_{19}\text{H}_{19}\text{NO}_3\text{S}$   $[\text{M}+\text{Na}]^+$ : 364.0978, found: 364.0977.

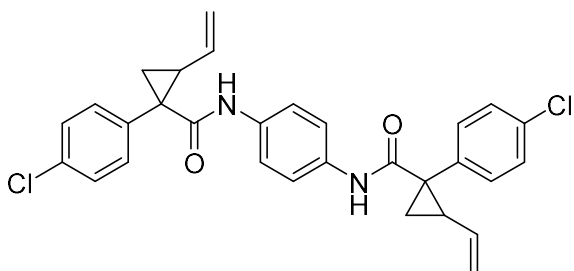

*N,N'*-(1,4-Phenylene)bis((4-chlorophenyl)-2-vinylcyclopropane-1-carboxamide) (**1z**). white solid. Mp = 190–192 °C.  $^1\text{H NMR}$  (400 MHz,  $\text{CDCl}_3$ )  $\delta$  7.42–7.38 (m, 8H), 7.22 (d,  $J = 0.8$  Hz, 4H), 6.91 (s, 2H), 6.01–5.92 (m, 2H), 5.32 (dd,  $J = 16.0, 1.6$  Hz, 2H), 5.11 (dd,  $J = 10.0, 1.6$  Hz, 2H), 2.29–2.23 (m, 2H), 2.05 (dd,  $J = 6.8, 4.4$  Hz, 2H), 1.37 (q,  $J = 4.4$  Hz, 2H).  $^{13}\text{C}\{^1\text{H}\}$  NMR (101 MHz,  $\text{CDCl}_3$ )  $\delta$  168.4, 138.8, 135.3, 134.4, 134.3, 131.8, 129.8, 120.3, 116.8, 38.2, 32.6, 21.5. HRMS (ESI) (m/z) calculated for  $\text{C}_{30}\text{H}_{26}\text{Cl}_2\text{N}_2\text{O}_2$   $[\text{M}+\text{Na}]^+$ : 539.1264, found: 539.1249.

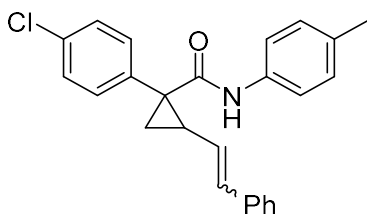

1-(4-Chlorophenyl)-2-styryl-*N*-(*p*-tolyl)cyclopropane-1-carboxamide (**1aa**). white solid. Mp = 156–158 °C.  $^1\text{H NMR}$  (600 MHz,  $\text{CDCl}_3$ )  $\delta$  7.47 (d,  $J = 7.8$  Hz, 2H), 7.42 (d,  $J = 7.8$  Hz, 2H), 7.37 (d,  $J = 7.8$  Hz, 2H), 7.28 (t,  $J = 7.2$  Hz, 2H), 7.20 (d,  $J = 8.4$  Hz, 3H), 7.05 (d,  $J = 7.8$  Hz, 2H), 6.94 (s, 1H), 6.68 (d,  $J = 16.2$  Hz, 1H), 6.49 (dd,  $J = 15.6, 9.0$  Hz, 1H), 2.42 (q,  $J = 8.4$  Hz, 1H), 2.27 (s, 3H), 2.20–2.18 (m, 1H), 1.50 (q,  $J = 4.2$  Hz, 1H).  $^{13}\text{C}\{^1\text{H}\}$  NMR (151 MHz,  $\text{CDCl}_3$ )  $\delta$  168.5, 139.0, 137.3, 135.2, 134.4, 134.2, 131.9, 131.8, 129.8, 129.5, 128.6, 127.4, 127.3, 126.2, 120.1, 38.5, 32.8, 22.1, 21.0. HRMS (ESI) (m/z) calculated for  $\text{C}_{25}\text{H}_{22}\text{ClNO}$   $[\text{M}+\text{Na}]^+$ : 410.1282, found: 410.1284.

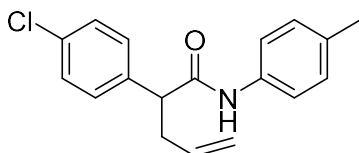

*2-(4-Chlorophenyl)-N-(p-tolyl)pent-4-enamide (1ab)*. white solid. Mp = 89–91 °C. **<sup>1</sup>H NMR** (600 MHz, CDCl<sub>3</sub>) δ 7.34–7.30 (m, 6H), 7.09 (d, *J* = 8.4 Hz, 2H), 7.00 (s, 1H), 5.75–5.71 (m, 1H), 5.08 (d, *J* = 16.8 Hz, 1H), 5.01 (d, *J* = 10.2 Hz, 1H), 3.50 (t, *J* = 7.8 Hz, 1H), 2.98–2.93 (m, 1H), 2.57–2.52 (m, 1H), 2.29 (s, 3H). **<sup>13</sup>C{<sup>1</sup>H} NMR** (151 MHz, CDCl<sub>3</sub>) δ 170.5, 137.7, 135.4, 135.1, 134.3, 133.6, 129.60, 129.56, 129.3, 120.0, 117.6, 53.7, 37.8, 21.0. **HRMS** (ESI) (*m/z*) calculated for C<sub>18</sub>H<sub>18</sub>ClNO [M+Na]<sup>+</sup>: 322.0969, found: 322.0969.



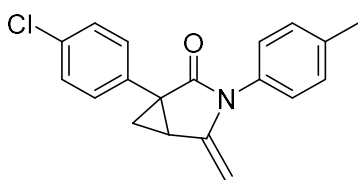

*1-(4-Chlorophenyl)-4-methylene-3-(p-tolyl)-3-azabicyclo[3.1.0]hexan-2-one (2a)*. white solid (Yield: 60%). Mp = 156–158 °C.  $^1\text{H NMR}$  (400 MHz,  $\text{CDCl}_3$ )  $\delta$  7.45–7.42 (m, 2H), 7.35–7.31 (m, 2H), 7.25 (d,  $J = 7.6$  Hz, 2H), 7.12–7.09 (m, 2H), 4.39 (d,  $J = 1.2$  Hz, 1H), 4.17 (d,  $J = 0.8$  Hz, 1H), 2.83 (q,  $J = 4.0$  Hz, 1H), 2.38 (s, 3H), 1.67 (dd,  $J = 8.0, 4.8$  Hz, 1H), 1.55 (t,  $J = 4.0$  Hz, 1H).  $^{13}\text{C NMR}$  (101 MHz,  $\text{CDCl}_3$ )  $\delta$  173.4, 146.9, 138.2, 133.6, 133.5, 132.1, 130.13, 130.12, 128.8, 127.6, 86.9, 33.9, 25.9, 23.8, 21.3. **HRMS** (ESI) ( $m/z$ ) calculated for  $\text{C}_{19}\text{H}_{16}\text{ClNO}$   $[\text{M}+\text{H}]^+$ : 310.0993, found: 310.0989.

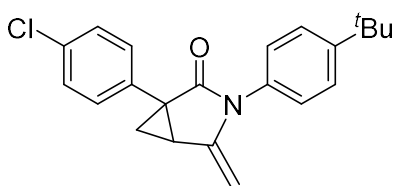

*3-(4-(Tert-butyl)phenyl)-1-(4-chlorophenyl)-4-methylene-3-azabicyclo[3.1.0]hexan-2-one (2b)*. white solid (Yield: 46%). Mp = 165–167 °C.  $^1\text{H NMR}$  (600 MHz,  $\text{CDCl}_3$ )  $\delta$  7.45 (t,  $J = 7.8$  Hz, 4H), 7.33 (d,  $J = 8.4$  Hz, 2H), 7.15 (d,  $J = 8.4$  Hz, 2H), 4.40 (s, 1H), 4.21 (s, 1H), 2.83 (q,  $J = 3.6$  Hz, 1H), 1.68 (dd,  $J = 7.8, 4.8$  Hz, 1H), 1.55 (d,  $J = 4.2$  Hz, 1H), 1.34 (s, 9H).  $^{13}\text{C}\{^1\text{H}\}$  NMR (151 MHz,  $\text{CDCl}_3$ )  $\delta$  173.4, 151.1, 146.8, 133.7, 133.5, 132.0, 130.1, 128.8, 127.2, 126.4, 87.1, 34.8, 33.8, 31.5, 25.9, 23.8. **HRMS** (ESI) ( $m/z$ ) calculated for  $\text{C}_{22}\text{H}_{22}\text{ClNO}$   $[\text{M}+\text{H}]^+$ : 352.1463, found: 352.1458.

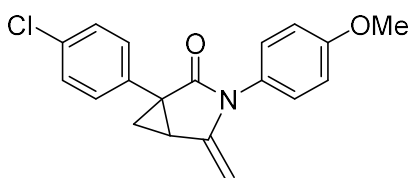

*1-(4-Chlorophenyl)-3-(4-methoxyphenyl)-4-methylene-3-azabicyclo[3.1.0]hexan-2-one (2c)*. white solid (Yield: 59%). Mp = 53–54 °C.  $^1\text{H NMR}$  (600 MHz,  $\text{CDCl}_3$ )  $\delta$  7.44 (d,  $J = 8.4$  Hz, 2H), 7.33 (d,  $J = 9.0$  Hz, 2H), 7.13 (d,  $J = 9.0$  Hz, 2H), 6.96 (d,  $J = 9.0$  Hz, 2H), 4.38 (d,  $J = 0.6$  Hz, 1H), 4.15 (s, 1H), 3.82 (s, 3H), 2.83 (dd,  $J = 7.8, 3.6$  Hz, 1H), 1.67 (dd,  $J = 7.8, 4.8$  Hz, 1H), 1.54 (t,  $J = 4.2$  Hz, 1H).  $^{13}\text{C}\{^1\text{H}\}$  NMR (151 MHz,  $\text{CDCl}_3$ )  $\delta$  173.6, 159.3, 147.1, 133.6, 133.5, 130.1, 129.0, 128.8, 127.3, 114.8, 86.9, 55.6, 33.8, 25.8, 23.8. **HRMS** (ESI) ( $m/z$ ) calculated for  $\text{C}_{19}\text{H}_{16}\text{ClNO}_2$   $[\text{M}+\text{H}]^+$ : 326.0942, found: 326.0943.

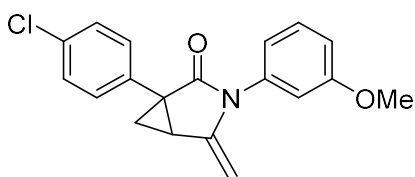

*1-(4-Chlorophenyl)-3-(3-methoxyphenyl)-4-methylene-3-azabicyclo[3.1.0]hexan-2-one (2d)*. white solid (Yield: 48%). Mp = 60–64 °C.  $^1\text{H NMR}$  (600 MHz,  $\text{CDCl}_3$ )  $\delta$  7.44 (d,  $J = 8.4$  Hz, 2H), 7.36–7.33 (m, 3H), 6.91 (dd,  $J = 8.4, 1.8$  Hz, 1H), 6.81 (d,  $J = 7.8$  Hz, 1H), 6.77 (s, 1H), 4.41 (s, 1H), 4.23 (s, 1H), 3.81 (s, 3H), 2.84 (dd,  $J = 7.8, 4.2$  Hz, 1H), 1.67 (dd,  $J = 7.8, 4.8$  Hz, 1H), 1.55 (t,  $J = 4.2$  Hz, 1H).  $^{13}\text{C}\{^1\text{H}\}$  NMR (151 MHz,  $\text{CDCl}_3$ )  $\delta$  173.3, 160.5, 146.6, 135.9, 133.6, 133.5, 130.2, 130.1, 128.8, 120.0, 114.3, 113.4, 87.3, 55.6, 33.9, 25.8, 23.7. HRMS (ESI) (m/z) calculated for  $\text{C}_{19}\text{H}_{16}\text{ClNO}_2$   $[\text{M}+\text{H}]^+$ : 326.0942, found: 326.0931.

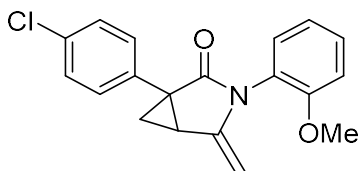

*1-(4-Chlorophenyl)-3-(2-methoxyphenyl)-4-methylene-3-azabicyclo[3.1.0]hexan-2-one (2e)*. white solid (Yield: 34%). Mp = 145–147 °C.  $^1\text{H NMR}$  (600 MHz,  $\text{CDCl}_3$ )  $\delta$  7.45 (d,  $J = 8.4$  Hz, 2H, major), 7.43 (d,  $J = 8.4$  Hz, 0.8H, minor), 7.39–7.35 (m, 1.4H), 7.34–7.32 (m, 2.7H), 7.23 (d,  $J = 7.8$  Hz, 1H), 7.04 (d,  $J = 7.8$  Hz, 1H), 7.02–7.00 (m, 1H), 6.98 (d,  $J = 7.8$  Hz, 1H), 4.33 (s, 1H, major), 4.31 (s, 0.4H, minor), 3.97 (s, 1H, major), 3.91 (s, 0.4H, minor), 3.83 (s, 1H, major), 3.79 (s, 3H, major), 2.83 (dd,  $J = 7.8, 3.6$  Hz, 1H, major), 1.73 (dd,  $J = 7.8, 4.8$  Hz, 0.4H, minor), 1.71 (t,  $J = 4.2$  Hz, 1H, major), 1.63 (dd,  $J = 7.8, 4.2$  Hz, 1H, major), 1.60 (t,  $J = 4.2$  Hz, 0.4H, minor), 0.88–0.85 (m, 0.4H, minor).  $^{13}\text{C}\{^1\text{H}\}$  NMR (101 MHz,  $\text{CDCl}_3$ )  $\delta$  173.6 (major), 173.5 (minor), 156.5 (major), 155.1 (minor), 146.7 (minor), 146.6 (major), 133.9 (major), 133.4 (minor), 131.0 (major), 130.4 (minor), 130.3 (major), 130.1 (minor), 130.0 (major), 129.4 (minor), 128.8 (minor), 128.7 (major), 123.2 (minor), 121.14 (minor), 121.06 (major), 112.7 (minor), 112.3 (major), 86.1 (minor), 86.0 (major), 56.2 (minor), 55.9 (major), 34.3 (minor), 33.7 (major), 26.8 (minor), 26.3 (major), 23.75 (minor), 23.73 (major). HRMS (ESI) (m/z) calculated for  $\text{C}_{19}\text{H}_{16}\text{ClNO}_2$   $[\text{M}+\text{H}]^+$ : 326.0942, found: 326.0960.

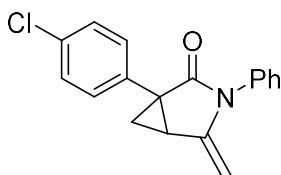

*1-(4-Chlorophenyl)-4-methylene-3-phenyl-3-azabicyclo[3.1.0]hexan-2-one (2f)*. white solid (Yield: 66%). Mp = 114–116 °C.  $^1\text{H NMR}$  (600 MHz, DMSO)  $\delta$  7.52–7.49 (m, 4H), 7.44–7.40 (m, 3H), 7.28 (d,  $J = 7.2$  Hz, 2H), 4.41 (s, 1H), 3.96 (s, 1H), 3.13 (dd,  $J = 7.8, 3.6$  Hz, 1H), 1.83 (dd,  $J = 7.8, 4.2$  Hz, 1H), 1.67 (t,  $J = 3.6$  Hz, 1H).  $^{13}\text{C}\{^1\text{H}\}$  NMR (151 MHz, DMSO)  $\delta$  172.8, 146.9, 134.7, 134.2, 131.9, 130.4, 129.3, 128.3, 128.2, 128.1, 86.1, 33.2, 25.7, 22.7. HRMS (ESI) (m/z) calculated for  $\text{C}_{18}\text{H}_{14}\text{ClNO}$   $[\text{M}+\text{H}]^+$ : 296.0837, found: 296.0846.

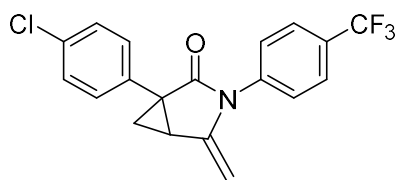

*1-(4-Chlorophenyl)-4-methylene-3-(4-(trifluoromethyl)phenyl)-3-azabicyclo[3.1.0]hexan-2-one (2g)*. white solid (Yield: 49%). Mp = 72–74 °C.  $^1\text{H NMR}$  (400 MHz,  $\text{CDCl}_3$ )  $\delta$  7.73 (d,  $J$  = 8.0 Hz, 2H), 7.46–7.41 (m, 4H), 7.37–7.33 (m, 2H), 4.49 (d,  $J$  = 1.6 Hz, 1H), 4.27 (d,  $J$  = 1.6 Hz, 1H), 2.89 (q,  $J$  = 4.0 Hz, 1H), 1.71 (dd,  $J$  = 8.0, 4.8 Hz, 1H), 1.58 (t,  $J$  = 4.4 Hz, 1H).  $^{13}\text{C}\{^1\text{H}\}$  NMR (101 MHz,  $\text{CDCl}_3$ )  $\delta$  173.2, 145.9, 138.1, 133.8, 133.1, 130.2, 130.1 (q,  $J_{\text{C-F}}$  = 32 Hz), 129.8, 128.9, 128.6, 128.0, 127.1, 126.6 (q,  $J_{\text{C-F}}$  = 40 Hz), 123.9 (q,  $J_{\text{C-F}}$  = 270 Hz), 87.7, 34.1, 25.8, 23.5.  $^{19}\text{F NMR}$  (376 MHz,  $\text{CDCl}_3$ )  $\delta$  -62.57 (s). HRMS (ESI) (m/z) calculated for  $\text{C}_{19}\text{H}_{13}\text{ClF}_3\text{NO}$   $[\text{M}+\text{H}]^+$ : 364.0711, found: 364.0705.

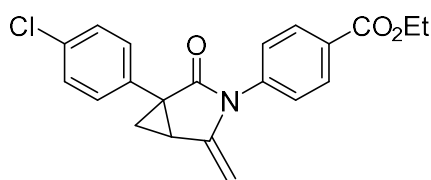

*Ethyl 4-(1-(4-chlorophenyl)-4-methylene-2-oxo-3-azabicyclo[3.1.0]hexan-3-yl)benzoate (2h)*. white solid (Yield: 48%). Mp = 53–55 °C.  $^1\text{H NMR}$  (600 MHz,  $\text{CDCl}_3$ )  $\delta$  8.13 (d,  $J$  = 8.4 Hz, 2H), 7.43 (d,  $J$  = 8.4 Hz, 2H), 7.34 (t,  $J$  = 9.6 Hz, 4H), 4.46 (d,  $J$  = 1.2 Hz, 1H), 4.39 (q,  $J$  = 7.2 Hz, 2H), 4.26 (d,  $J$  = 1.2 Hz, 1H), 2.86 (dd,  $J$  = 7.8, 3.6 Hz, 1H), 1.69 (dd,  $J$  = 7.8, 4.8 Hz, 1H), 1.56 (t,  $J$  = 4.2 Hz, 1H), 1.39 (t,  $J$  = 7.2 Hz, 3H).  $^{13}\text{C}\{^1\text{H}\}$  NMR (151 MHz,  $\text{CDCl}_3$ )  $\delta$  173.0, 165.9, 146.0, 138.9, 133.7, 133.2, 130.7, 130.2, 129.9, 128.8, 127.4, 87.6, 61.3, 34.1, 25.8, 23.5, 14.4. HRMS (ESI) (m/z) calculated for  $\text{C}_{21}\text{H}_{18}\text{ClNO}_3$   $[\text{M}+\text{H}]^+$ : 368.1048, found: 368.1044.

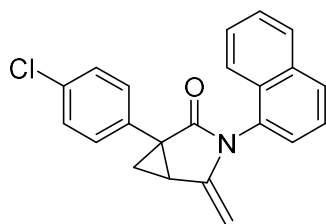

*1-(4-Chlorophenyl)-4-methylene-3-(naphthalen-1-yl)-3-azabicyclo[3.1.0]hexan-2-one (2i)*. white solid (Yield: 74%). Mp = 172–174 °C.  $^1\text{H NMR}$  (400 MHz,  $\text{CDCl}_3$ )  $\delta$  7.83–7.81 (m, 4H), 7.60–7.58 (m, 1H), 7.48 (d,  $J$  = 7.2 Hz, 1H), 7.45–7.43 (m, 3H), 7.42–7.40 (m, 6H), 7.36 (dd,  $J$  = 7.2, 0.8 Hz, 1H), 7.30–7.25 (m, 4H), 7.16–7.14 (m, 1H), 4.31 (d,  $J$  = 1.2 Hz, 1H), 4.27 (d,  $J$  = 1.2 Hz, 1H), 3.79 (d,  $J$  = 1.2 Hz, 1H), 3.72 (d,  $J$  = 0.8 Hz, 1H), 2.90–2.85 (m, 2H), 1.82 (t,  $J$  = 4.4 Hz, 1H), 1.70 (dd,  $J$  = 8.0, 4.8 Hz, 2H), 1.63 (t,  $J$  = 4.4 Hz, 1H).  $^{13}\text{C}\{^1\text{H}\}$  NMR (151 MHz,  $\text{CDCl}_3$ )  $\delta$  173.8, 173.7, 147.2, 146.5, 134.7, 133.7, 133.6, 131.6, 130.7, 130.6, 130.2, 130.1, 129.8, 129.6, 129.4, 128.9, 128.84,

128.79, 128.6, 128.2, 127.2, 127.0, 126.7, 126.5, 126.1, 125.82, 125.76, 123.0, 122.1, 87.9, 87.6, 34.23, 34.19, 26.5, 26.4, 24.2, 24.0. **HRMS** (ESI) (m/z) calculated for C<sub>22</sub>H<sub>16</sub>ClNO [M+H]<sup>+</sup>: 346.0993, found: 346.0994.

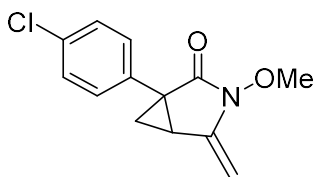

*1-(4-Chlorophenyl)-3-methoxy-4-methylene-3-azabicyclo[3.1.0]hexan-2-one (2k)*. white solid (Yield: 47%). Mp = 127–129 °C. **<sup>1</sup>H NMR** (400 MHz, CDCl<sub>3</sub>) δ 7.35–7.29 (m, 4H), 4.58 (s, 1H), 4.45 (s, 1H), 3.84 (s, 3H), 2.61 (dd, *J* = 7.6, 4.0 Hz, 1H), 1.61 (dd, *J* = 7.6, 4.8 Hz, 1H), 1.38 (t, *J* = 4.4 Hz, 1H). **<sup>13</sup>C{<sup>1</sup>H} NMR** (101 MHz, CDCl<sub>3</sub>) δ 168.0, 140.2, 133.8, 132.9, 130.0, 128.9, 85.2, 62.7, 30.4, 23.7, 22.2. **HRMS** (ESI) (m/z) calculated for C<sub>13</sub>H<sub>12</sub>ClNO<sub>2</sub> [M+H]<sup>+</sup>: 250.0629, found: 250.0622.

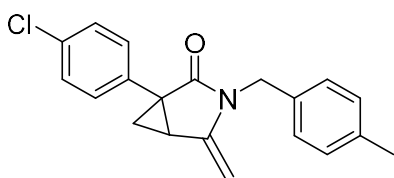

*1-(4-Chlorophenyl)-3-(4-methylbenzyl)-4-methylene-3-azabicyclo[3.1.0]hexan-2-one (2l)*. white solid (Yield: 20%). Mp = 124–126 °C. **<sup>1</sup>H NMR** (400 MHz, CDCl<sub>3</sub>) δ 7.40–7.37 (m, 2H), 7.33–7.31 (m, 2H), 7.14–7.09 (m, 4H), 4.59 (dd, *J* = 44.0, 15.6 Hz, 2H), 4.35 (d, *J* = 2.0 Hz, 1H), 4.28 (d, *J* = 1.2 Hz, 1H), 2.69 (q, *J* = 3.6 Hz, 1H), 2.32 (s, 3H), 1.57 (dd, *J* = 8.0, 4.4 Hz, 1H), 1.35 (t, *J* = 4.4 Hz, 1H). **<sup>13</sup>C{<sup>1</sup>H} NMR** (101 MHz, CDCl<sub>3</sub>) δ 174.1, 144.9, 137.3, 133.7, 133.6, 133.4, 130.2, 129.5, 128.8, 127.4, 86.6, 43.5, 33.7, 25.9, 23.7, 21.2. **HRMS** (ESI) (m/z) calculated for C<sub>20</sub>H<sub>18</sub>ClNO [M+Na]<sup>+</sup>: 346.0969, found: 346.0960.

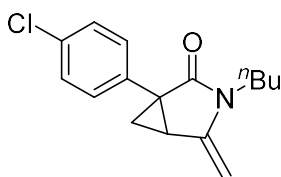

*3-Butyl-1-(4-chlorophenyl)-4-methylene-3-azabicyclo[3.1.0]hexan-2-one (2m)*. colorless oil (Yield: 21%). **<sup>1</sup>H NMR** (600 MHz, CDCl<sub>3</sub>) δ 7.36–7.34 (m, 2H), 7.31–7.29 (m, 2H), 4.38 (d, *J* = 1.8 Hz, 1H), 4.29 (s, 1H), 3.54–3.47 (m, 1H), 3.39–3.32 (m, 1H), 2.67 (q, *J* = 6.0 Hz, 1H), 1.53–1.47 (m, 2H), 1.34–1.26 (m, 4H), 0.93 (t, *J* = 10.8 Hz, 3H). **<sup>13</sup>C{<sup>1</sup>H} NMR** (101 MHz, CDCl<sub>3</sub>) δ 173.9, 145.5, 133.8, 133.5, 130.1, 128.8, 85.1, 39.6, 33.7, 29.1, 25.9, 24.1, 20.2, 13.9. **HRMS** (ESI) (m/z) calculated for C<sub>16</sub>H<sub>18</sub>ClNO [M+Na]<sup>+</sup>: 298.0969, found: 298.0961.

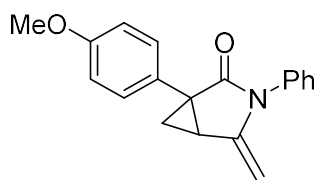

*1-(4-Methoxyphenyl)-4-methylene-3-phenyl-3-azabicyclo[3.1.0]hexan-2-one (2p)*. white solid (Yield: 53%). Mp = 108–110 °C.  $^1\text{H NMR}$  (400 MHz,  $\text{CDCl}_3$ )  $\delta$  7.46–7.40 (m, 4H), 7.35 (t,  $J = 7.2$  Hz, 1H), 7.24 (d,  $J = 7.6$  Hz, 2H), 6.90 (d,  $J = 8.8$  Hz, 2H), 4.38 (s, 1H), 4.17 (s, 1H), 3.81 (s, 3H), 2.80 (dd,  $J = 7.6, 3.6$  Hz, 1H), 1.67 (dd,  $J = 8.0, 4.4$  Hz, 1H), 1.51 (t,  $J = 4.4$  Hz, 1H).  $^{13}\text{C}\{^1\text{H}\}$  NMR (101 MHz,  $\text{CDCl}_3$ )  $\delta$  174.1, 159.2, 147.3, 135.0, 130.2, 129.4, 128.1, 127.9, 127.0, 114.1, 86.6, 55.5, 34.1, 25.6, 23.4. HRMS (ESI) (m/z) calculated for  $\text{C}_{19}\text{H}_{17}\text{NO}_2$   $[\text{M}+\text{H}]^+$ : 292.1332, found: 292.1332.

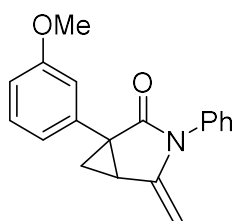

*1-(2-Methoxyphenyl)-4-methylene-3-phenyl-3-azabicyclo[3.1.0]hexan-2-one (2q)*. white solid (Yield: 52%). Mp = 81–83 °C.  $^1\text{H NMR}$  (400 MHz,  $\text{CDCl}_3$ )  $\delta$  7.46–7.42 (m, 2H), 7.37–7.34 (m, 1H), 7.32–7.28 (m, 1H), 7.24–7.21 (m, 2H), 7.13–7.12 (m, 1H), 7.04–7.01 (m, 1H), 6.85–6.82 (m, 1H), 4.38 (d,  $J = 0.8$  Hz, 1H), 4.17 (s, 1H), 3.81 (s, 3H), 2.84 (q,  $J = 4.0$  Hz, 1H), 1.70 (dd,  $J = 7.6, 4.4$  Hz, 1H), 1.54 (t,  $J = 4.4$  Hz, 1H).  $^{13}\text{C}\{^1\text{H}\}$  NMR (101 MHz,  $\text{CDCl}_3$ )  $\delta$  173.6, 159.8, 147.0, 136.5, 134.9, 129.6, 129.4, 128.1, 127.8, 120.7, 114.5, 113.3, 86.8, 55.4, 34.4, 26.0, 23.9. HRMS (ESI) (m/z) calculated for  $\text{C}_{19}\text{H}_{17}\text{NO}_2$   $[\text{M}+\text{H}]^+$ : 292.1332, found: 292.1339.

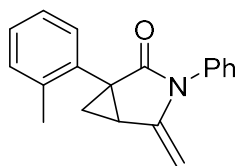

*4-Methylene-3-phenyl-1-(o-tolyl)-3-azabicyclo[3.1.0]hexan-2-one (2r)*. white solid (Yield: 55%). Mp = 132–135 °C.  $^1\text{H NMR}$  (600 MHz,  $\text{CDCl}_3$ )  $\delta$  7.46 (t,  $J = 7.8$  Hz, 2H), 7.36 (t,  $J = 7.2$  Hz, 1H), 7.33 (d,  $J = 7.8$  Hz, 1H), 7.26–7.24 (m, 4H), 7.22–7.19 (m, 1H), 4.43 (s, 1H), 4.21 (s, 1H), 2.68 (dd,  $J = 7.8, 3.6$  Hz, 1H), 2.44 (s, 3H), 1.78 (q,  $J = 3.6$  Hz, 1H), 1.59 (t,  $J = 4.2$  Hz, 1H).  $^{13}\text{C}\{^1\text{H}\}$  NMR (151 MHz,  $\text{CDCl}_3$ )  $\delta$  173.7, 147.4, 139.6, 135.0, 133.5, 130.8, 130.5, 129.4, 128.4, 128.1, 127.8, 126.1, 86.8, 35.0, 25.6, 22.0, 19.6. HRMS (ESI) (m/z) calculated for  $\text{C}_{19}\text{H}_{17}\text{NO}$   $[\text{M}+\text{H}]^+$ : 276.1383, found: 276.1383.

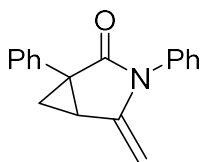

*4-Methylene-1,3-diphenyl-3-azabicyclo[3.1.0]hexan-2-one (2s)*. white solid (Yield: 49%). Mp = 114–116 °C.  $^1\text{H NMR}$  (600 MHz,  $\text{CDCl}_3$ )  $\delta$  7.43–7.42 (m, 2H), 7.37 (t,  $J = 7.8$  Hz, 2H), 7.30–7.27 (m, 3H), 7.23–7.22 (m, 1H), 7.17 (d,  $J = 7.8$  Hz, 2H), 4.32 (d,  $J = 1.2$  Hz, 1H), 4.10 (s, 1H), 2.77 (q,  $J = 4.2$  Hz, 1H), 1.65 (dd,  $J = 7.8, 4.8$  Hz, 1H), 1.47 (t,  $J = 4.2$  Hz, 1H).  $^{13}\text{C}\{^1\text{H}\}$  NMR (151 MHz,  $\text{CDCl}_3$ )  $\delta$  173.7, 147.1, 135.0, 129.4, 128.8, 128.6, 128.1, 127.9, 127.6, 86.7, 34.5, 25.9, 23.6. HRMS (ESI) (m/z) calculated for  $\text{C}_{18}\text{H}_{15}\text{NO}$   $[\text{M}+\text{H}]^+$ : 262.1226, found: 262.1226.

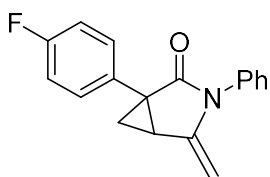

*1-(4-Fluorophenyl)-4-methylene-3-phenyl-3-azabicyclo[3.1.0]hexan-2-one (2t)*. white solid (Yield: 57%). Mp = 120–122 °C.  $^1\text{H NMR}$  (600 MHz,  $\text{CDCl}_3$ )  $\delta$  7.48 (d,  $J = 5.4$  Hz, 1H), 7.47 (d,  $J = 3.0$  Hz, 1H), 7.46–7.41 (m, 2H), 7.36 (t,  $J = 7.2$  Hz, 1H), 7.24 (d,  $J = 7.8$  Hz, 2H), 7.06 (t,  $J = 8.4$  Hz, 2H), 4.41 (s, 1H), 4.19 (s, 1H), 2.84 (dd,  $J = 7.8, 3.6$  Hz, 1H), 1.68 (dd,  $J = 7.8, 4.8$  Hz, 1H), 1.55 (t,  $J = 4.2$  Hz, 1H).  $^{13}\text{C}\{^1\text{H}\}$  NMR (151 MHz,  $\text{CDCl}_3$ )  $\delta$  173.6, 162.4 (d,  $J_{\text{C-F}} = 246.1$  Hz), 146.9, 134.8, 130.7 (d,  $J_{\text{C-F}} = 3.0$  Hz), 130.6 (d,  $J_{\text{C-F}} = 9.1$  Hz), 129.5, 128.2, 127.8, 115.6 (d,  $J_{\text{C-F}} = 21.1$  Hz), 87.0, 34.0, 25.7, 23.6.  $^{19}\text{F NMR}$  (565 MHz,  $\text{CDCl}_3$ )  $\delta$  -114.60. HRMS (ESI) (m/z) calculated for  $\text{C}_{18}\text{H}_{14}\text{FNO}$   $[\text{M}+\text{H}]^+$ : 280.1132, found: 280.1139.

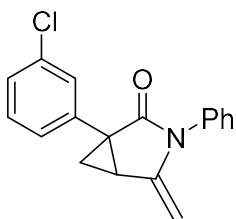

*1-(3-Chlorophenyl)-4-methylene-3-phenyl-3-azabicyclo[3.1.0]hexan-2-one (2u)*. white solid (Yield: 51%). Mp = 116–118 °C.  $^1\text{H NMR}$  (400 MHz,  $\text{CDCl}_3$ )  $\delta$  7.44–7.38 (m, 3H), 7.36–7.34 (m, 1H), 7.32–7.30 (m, 1H), 7.24–7.20 (m, 2H), 7.19–7.17 (m, 2H), 4.35 (d,  $J = 1.2$  Hz, 1H), 4.14 (d,  $J = 1.2$  Hz, 1H), 2.81 (q,  $J = 4.0$  Hz, 1H), 1.66 (dd,  $J = 8.0, 4.4$  Hz, 1H), 1.52 (d,  $J = 4.0$  Hz, 1H).  $^{13}\text{C}\{^1\text{H}\}$  NMR (101 MHz,  $\text{CDCl}_3$ )  $\delta$  173.1, 146.6, 137.1, 134.8, 134.5, 129.9, 129.5, 128.8, 128.3, 127.9, 127.8, 127.0, 87.3, 34.1, 26.0, 23.8. HRMS (ESI) (m/z) calculated for  $\text{C}_{18}\text{H}_{14}\text{ClNO}$   $[\text{M}+\text{H}]^+$ : 296.0837, found: 296.0835.

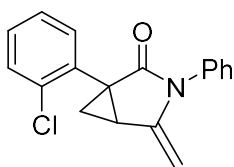

*1-(2-Chlorophenyl)-4-methylene-3-phenyl-3-azabicyclo[3.1.0]hexan-2-one (2v)*. white solid (Yield: 53%). Mp = 162–163 °C.  $^1\text{H NMR}$  (600 MHz,  $\text{CDCl}_3$ )  $\delta$  7.46–7.41 (m, 4H), 7.37–7.34 (m, 1H), 7.30–7.28 (m, 2H), 7.27–7.26 (m, 1H), 7.26–7.25 (m, 1H), 4.42 (d,  $J = 1.2$  Hz, 1H), 4.20 (s, 1H), 2.67 (q,  $J = 3.6$  Hz, 1H), 1.83 (dd,  $J = 7.8, 4.8$  Hz, 1H), 1.61 (t,  $J = 4.2$  Hz, 1H).  $^{13}\text{C}\{^1\text{H}\}$  NMR (151 MHz,  $\text{CDCl}_3$ )  $\delta$  173.1, 147.3, 136.9, 135.0, 133.5, 132.5, 129.7, 129.4, 128.1, 127.9, 127.1, 87.1, 35.2, 26.1, 21.2. HRMS (ESI) (m/z) calculated for  $\text{C}_{18}\text{H}_{14}\text{ClNO}$   $[\text{M}+\text{H}]^+$ : 296.0837, found: 296.0834.

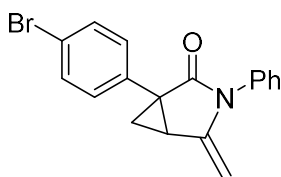

*1-(4-Bromophenyl)-4-methylene-3-phenyl-3-azabicyclo[3.1.0]hexan-2-one (2w)*. white solid (Yield: 48%). Mp = 99–102 °C.  $^1\text{H NMR}$  (600 MHz,  $\text{CDCl}_3$ )  $\delta$  7.40–7.38 (m, 2H), 7.37–7.34 (m, 2H), 7.30–7.26 (m, 3H), 7.14–7.13 (m, 2H), 4.31 (d,  $J = 1.2$  Hz, 1H), 4.10 (d,  $J = 1.2$  Hz, 1H), 2.75 (dd,  $J = 7.8, 4.2$  Hz, 1H), 1.58 (dd,  $J = 7.8, 4.8$  Hz, 1H), 1.46 (t,  $J = 4.2$  Hz, 1H).  $^{13}\text{C}\{^1\text{H}\}$  NMR (101 MHz,  $\text{CDCl}_3$ )  $\delta$  173.3, 146.7, 134.8, 134.1, 131.8, 130.4, 129.5, 128.2, 127.8, 121.7, 87.2, 33.9, 25.9, 23.7. HRMS (ESI) (m/z) calculated for  $\text{C}_{18}\text{H}_{14}\text{BrNO}$   $[\text{M}+\text{H}]^+$ : 340.0332, found: 340.0323.

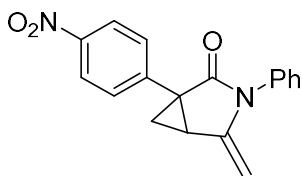

*4-Methylene-1-(4-nitrophenyl)-3-phenyl-3-azabicyclo[3.1.0]hexan-2-one (2x)*. white solid (Yield: 58%). Mp = 193–195 °C.  $^1\text{H NMR}$  (400 MHz,  $\text{CDCl}_3$ )  $\delta$  8.24–8.21 (m, 2H), 7.72–7.69 (m, 2H), 7.49–7.45 (m, 2H), 7.41–7.36 (m, 1H), 7.25–7.23 (m, 2H), 4.46 (d,  $J = 1.2$  Hz, 1H), 4.23 (d,  $J = 1.6$  Hz, 1H), 2.99 (q,  $J = 4.4$  Hz, 1H), 1.79 (dd,  $J = 8.0, 4.8$  Hz, 1H), 1.70 (t,  $J = 4.4$  Hz, 1H).  $^{13}\text{C}\{^1\text{H}\}$  NMR (101 MHz,  $\text{CDCl}_3$ )  $\delta$  172.4, 147.2, 146.0, 142.8, 134.5, 129.6, 129.1, 128.5, 127.8, 123.8, 87.9, 33.8, 26.9, 24.8. HRMS (ESI) (m/z) calculated for  $\text{C}_{18}\text{H}_{14}\text{N}_2\text{O}_3$   $[\text{M}+\text{H}]^+$ : 307.1077, found: 307.1070.

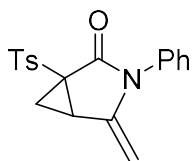

*4-Methylene-3-phenyl-1-tosyl-3-azabicyclo[3.1.0]hexan-2-one (2y)*. white solid (Yield: 16%). Mp = 186–188 °C.  $^1\text{H NMR}$  (600 MHz,  $\text{CDCl}_3$ )  $\delta$  7.99 (d,  $J = 8.4$  Hz, 2H), 7.42 (t,  $J = 7.8$  Hz, 2H), 7.36

(d,  $J = 7.8$  Hz, 3H), 7.13–7.12 (m, 2H), 4.50 (d,  $J = 1.8$  Hz, 1H), 4.24 (d,  $J = 1.8$  Hz, 1H), 3.49 (dd,  $J = 8.4, 4.8$  Hz, 1H), 2.44 (s, 3H), 2.17 (dd,  $J = 9.0, 5.4$  Hz, 1H), 1.56 (d,  $J = 4.8$  Hz, 1H).  $^{13}\text{C}\{^1\text{H}\}$  NMR (101 MHz,  $\text{CDCl}_3$ )  $\delta$  166.1, 145.4, 143.2, 136.1, 133.7, 129.8, 129.6, 129.4, 128.7, 127.7, 90.1, 48.0, 26.6, 22.4, 21.9. HRMS (ESI) ( $m/z$ ) calculated for  $\text{C}_{19}\text{H}_{17}\text{NO}_3\text{S}$   $[\text{M}+\text{H}]^+$ : 340.1002, found: 340.0991.

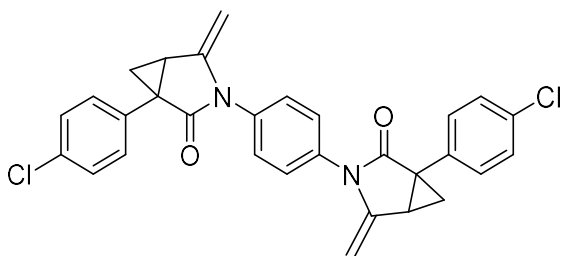

*3,3'-(1,4-Phenylene)bis(1-(4-chlorophenyl)-4-methylene-3-azabicyclo[3.1.0]hexan-2-one)* (**2z**). white solid (Yield: 24%). Mp: > 250 °C.  $^1\text{H}$  NMR (400 MHz,  $\text{CDCl}_3$ )  $\delta$  7.44–7.42 (m, 4H), 7.35 (d,  $J = 2.0$  Hz, 6H), 7.33 (d,  $J = 2.0$  Hz, 2H), 4.45 (d,  $J = 1.6$  Hz, 2H), 4.30 (s, 2H), 2.86 (q,  $J = 4.0$  Hz, 2H), 1.69 (dd,  $J = 7.6, 4.4$  Hz, 2H), 1.55 (d,  $J = 4.0$  Hz, 2H).  $^{13}\text{C}\{^1\text{H}\}$  NMR (101 MHz,  $\text{CDCl}_3$ )  $\delta$  173.3, 146.2, 134.3, 133.7, 133.3, 130.2, 128.9, 128.6, 87.7, 34.0, 25.9, 23.6. HRMS (ESI) ( $m/z$ ) calculated for  $\text{C}_{30}\text{H}_{22}\text{Cl}_2\text{N}_2\text{O}_2$   $[\text{M}+\text{Na}]^+$ : 535.0951, found: 535.0948.

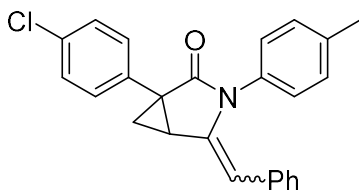

*4-Benzylidene-1-(4-chlorophenyl)-3-(p-tolyl)-3-azabicyclo[3.1.0]hexan-2-one* (**2aa**). yellow solid (Yield: 25%). Mp = 198–200 °C.  $^1\text{H}$  NMR (400 MHz,  $\text{CDCl}_3$ )  $\delta$  7.43 (d,  $J = 8.4$  Hz, 2H), 7.34–7.32 (m, 5H), 7.29 (d,  $J = 7.2$  Hz, 3H), 7.21–7.16 (m, 3H), 5.71 (s, 1H), 3.15 (q,  $J = 4.0$  Hz, 1H), 2.41 (s, 3H), 1.89 (dd,  $J = 7.6, 4.4$  Hz, 1H), 1.70 (t,  $J = 4.0$  Hz, 1H).  $^{13}\text{C}\{^1\text{H}\}$  NMR (101 MHz,  $\text{CDCl}_3$ )  $\delta$  173.0, 142.3, 138.5, 136.2, 133.6, 133.5, 132.1, 130.3, 130.1, 128.8, 128.6, 128.3, 128.0, 126.2, 105.2, 34.3, 24.7, 23.8, 21.4. HRMS (ESI) ( $m/z$ ) calculated for  $\text{C}_{25}\text{H}_{20}\text{ClNO}$   $[\text{M}+\text{H}]^+$ : 386.1306, found: 386.1294.

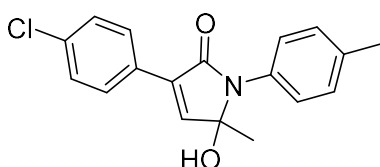

*3-(4-Chlorophenyl)-5-hydroxy-5-methyl-1-(p-tolyl)-1,5-dihydro-2H-pyrrol-2-one* (**2ab**). yellow solid (Yield: 18%). Mp = 168–170 °C.  $^1\text{H}$  NMR (400 MHz,  $\text{CDCl}_3$ )  $\delta$  7.83–8.00 (m, 2H), 7.34 (t,  $J = 8.8$  Hz, 4H), 7.18 (d,  $J = 8.0$  Hz, 2H), 7.06 (s, 1H), 2.90 (s, 1H), 2.38 (s, 3H), 1.51 (s, 3H).  $^{13}\text{C}\{^1\text{H}\}$  NMR (151 MHz,  $\text{CDCl}_3$ )  $\delta$  167.7, 142.5, 137.1, 135.4, 134.1, 132.7, 129.8, 128.91, 128.87, 126.6, 88.8,



23.2, 21.3. **HRMS** (ESI) (m/z) calculated for  $C_{18}H_{16}ClNO_2$   $[M+Na]^+$ : 336.0762, found: 336.0762.

## V. References

1. Matthew T. Knowe, Michael W. Danneman, Sarah Sun, Maren Pink, Jeffrey N. Johnston, Biomimetic Desymmetrization of a Carboxylic Acid, *J. Am. Chem. Soc.*, 2018, **140**, 1998.
2. Zhiguo Zhang, Yongchao Zhang, Guoqing Huang, Guisheng Zhang, Organoiodine reagent-promoted intermolecular oxidative amination: synthesis of cyclopropyl spirooxindoles, *Org. Chem. Front.*, 2017, **4**, 1372.
3. Senlin Wang, Xue Zhao, Daisy Zhang-Negrerie, Yunfei Du, Reductive cleavage of the N–O bond: elemental sulfur-mediated conversion of *N*-alkoxyamides to amides, *Org. Chem. Front.*, 2019, **6**, 347.
4. Che-Hung Lin, Dominik Pursley, Johannes E. M. N. Klein, Johannes Teske, Jennifer A. Allen, Fabian Rami, Andreas Kohn, Bernd Plietker, Non-decarbonylative photochemical versus thermal activation of Bu<sub>4</sub>N[Fe(CO)<sub>3</sub>(NO)]-the Fe-catalyzed Cloke-Wilson rearrangement of vinyl and arylcyclopropanes, *Chem. Sci.*, 2015, **6**, 7034.

## VI. $^1\text{H}$ NMR and $^{13}\text{C}\{^1\text{H}\}$ NMR spectra

$^1\text{H}$  NMR spectra of **1a** (600 MHz,  $\text{CDCl}_3$ )

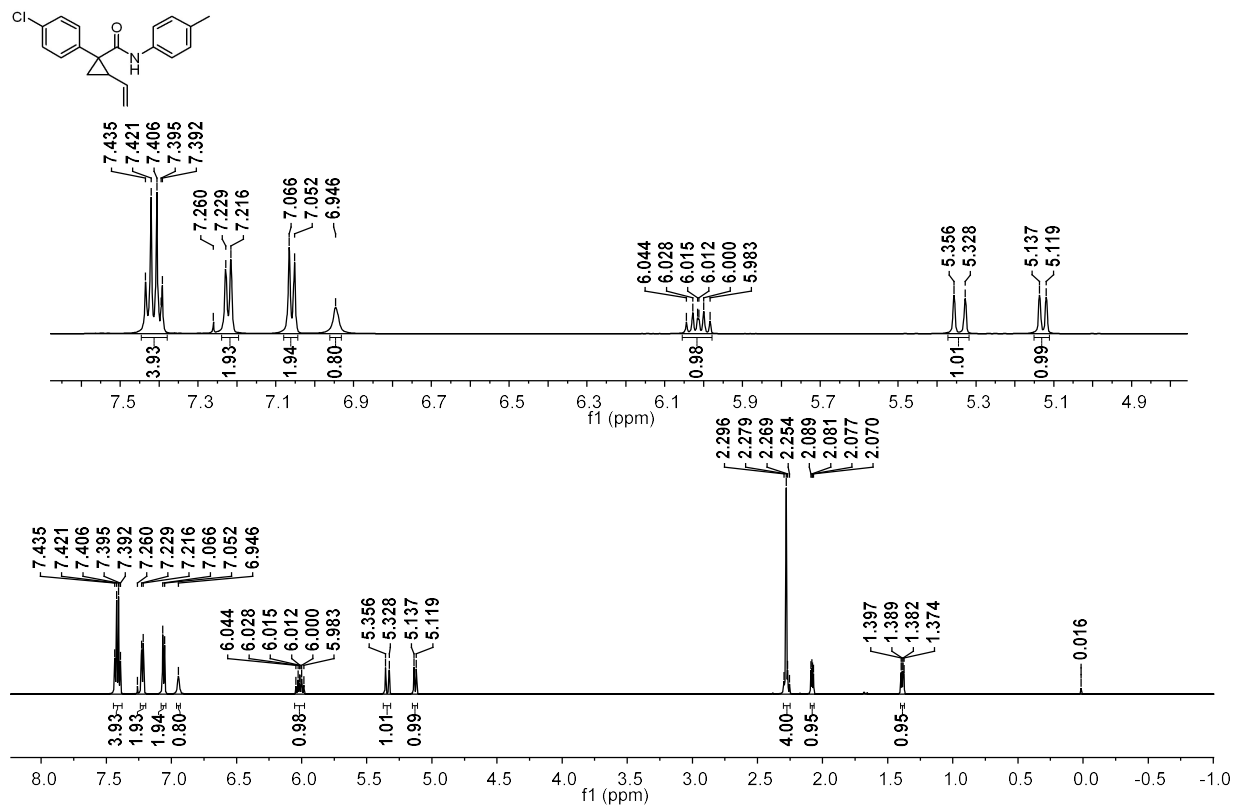

$^{13}\text{C}\{^1\text{H}\}$  NMR spectra of **1a** (151 MHz,  $\text{CDCl}_3$ )

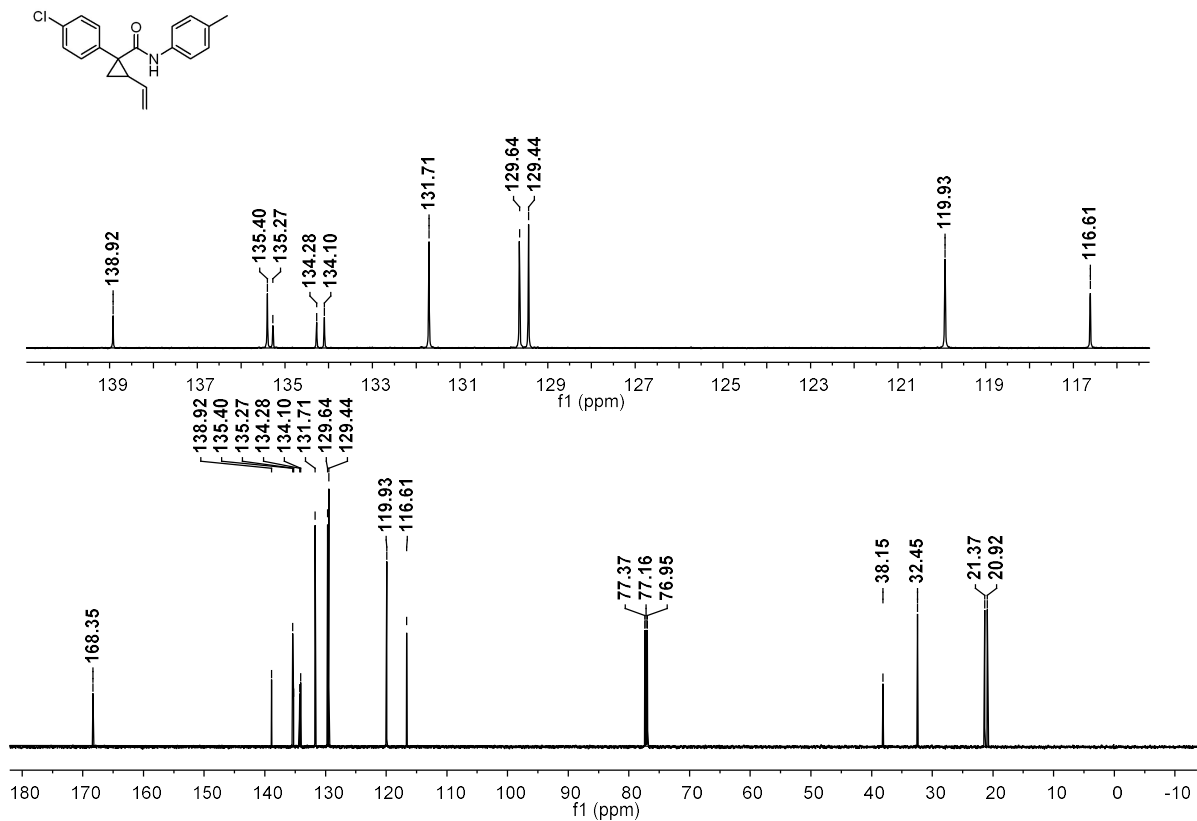

$^1\text{H}$  NMR spectra of **1b** (600 MHz,  $\text{CDCl}_3$ )

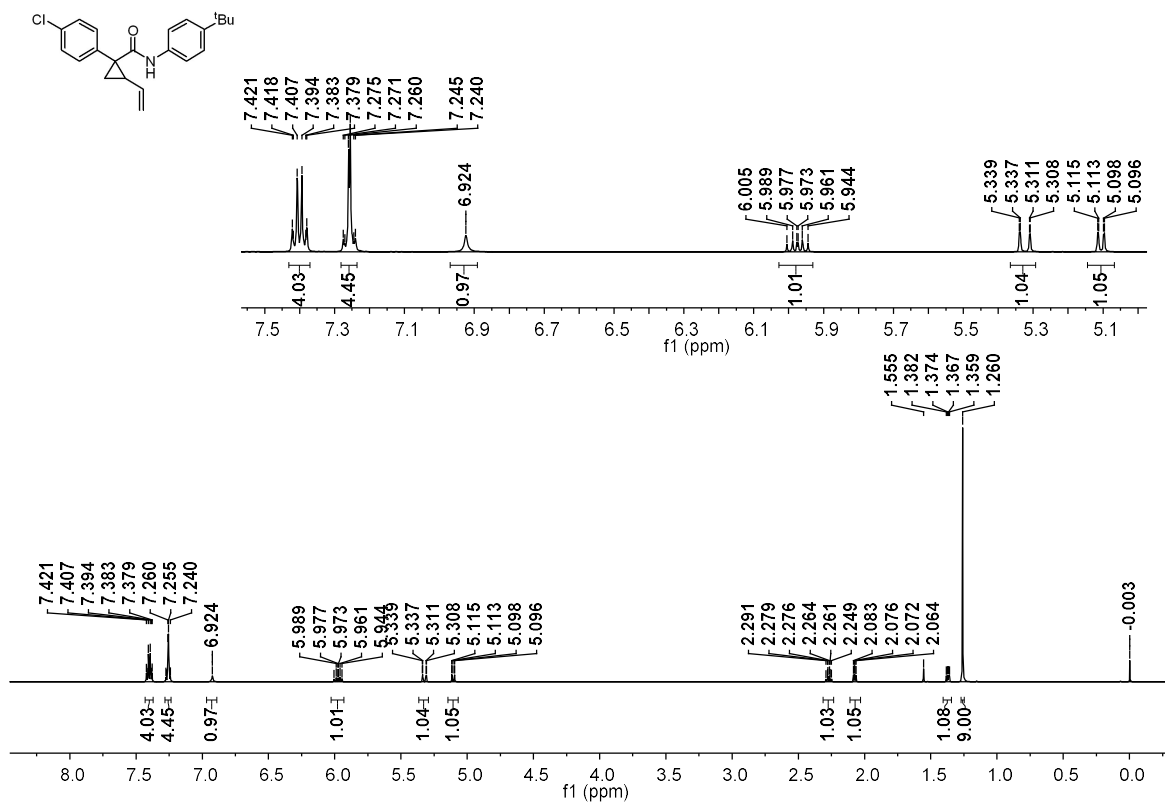

$^{13}\text{C}\{^1\text{H}\}$  NMR spectra of **1b** (151 MHz,  $\text{CDCl}_3$ )

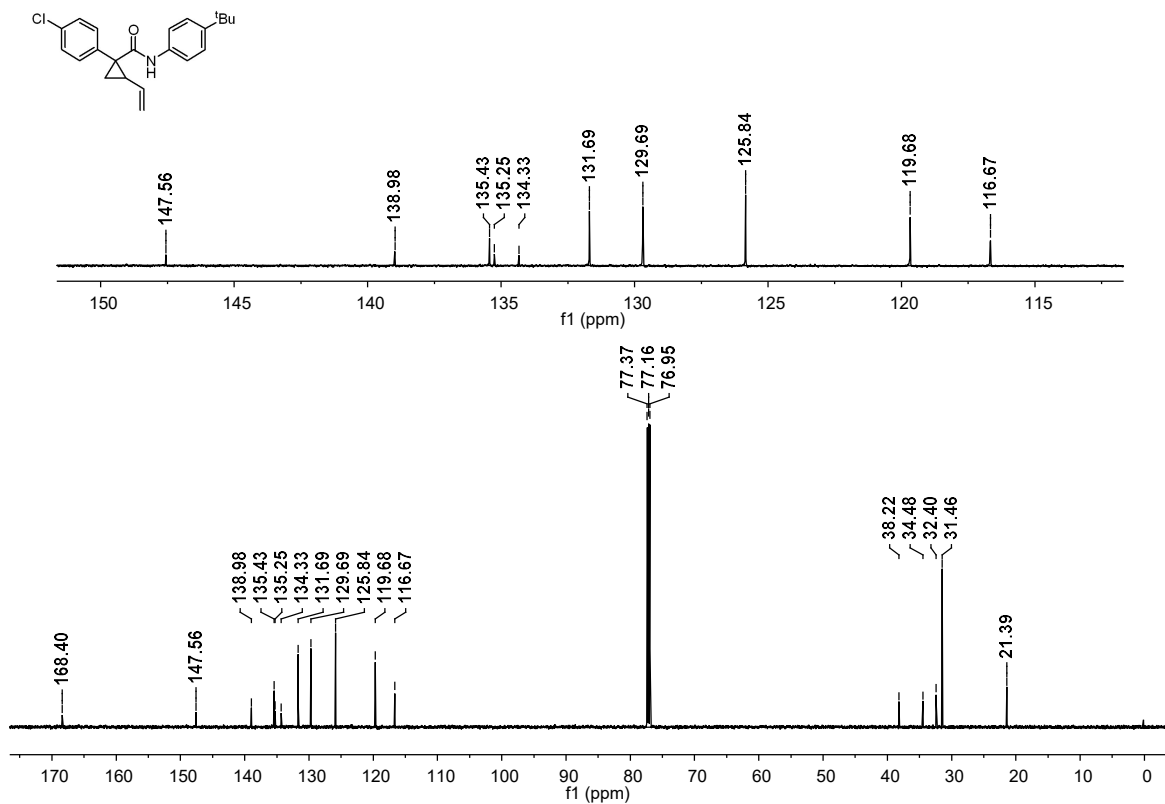

$^1\text{H}$  NMR spectra of **1c** (600 MHz,  $\text{CDCl}_3$ )

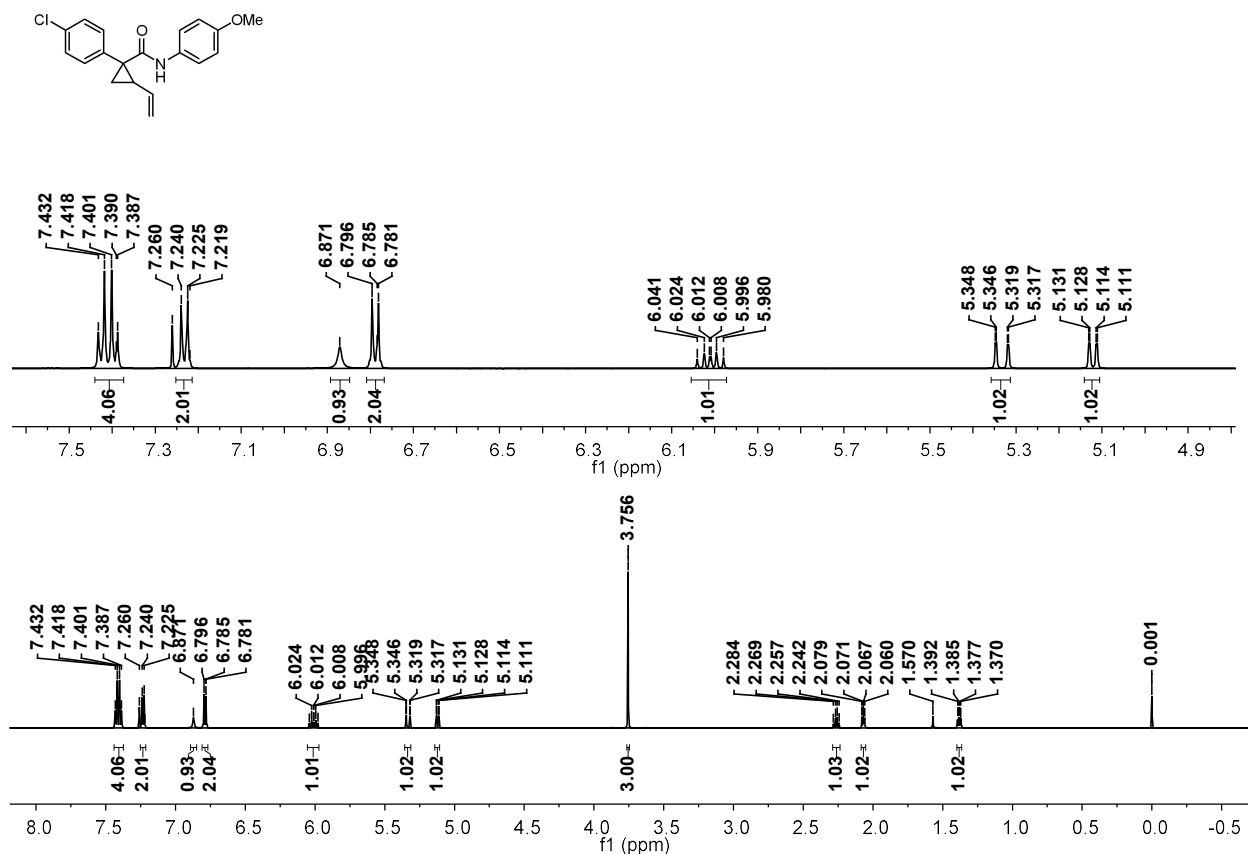

$^{13}\text{C}\{^1\text{H}\}$  NMR spectra of **1c** (151 MHz,  $\text{CDCl}_3$ )

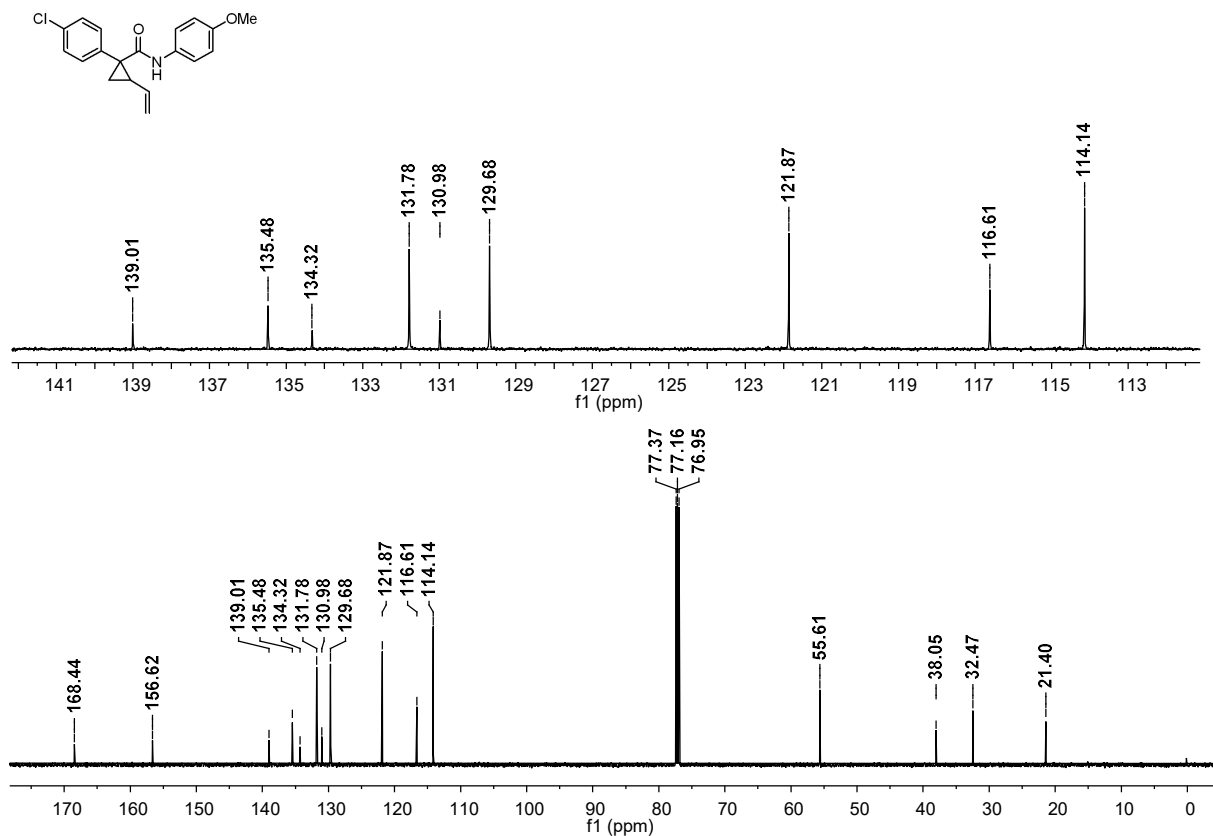

$^1\text{H}$  NMR spectra of **1d** (400 MHz,  $\text{CDCl}_3$ )

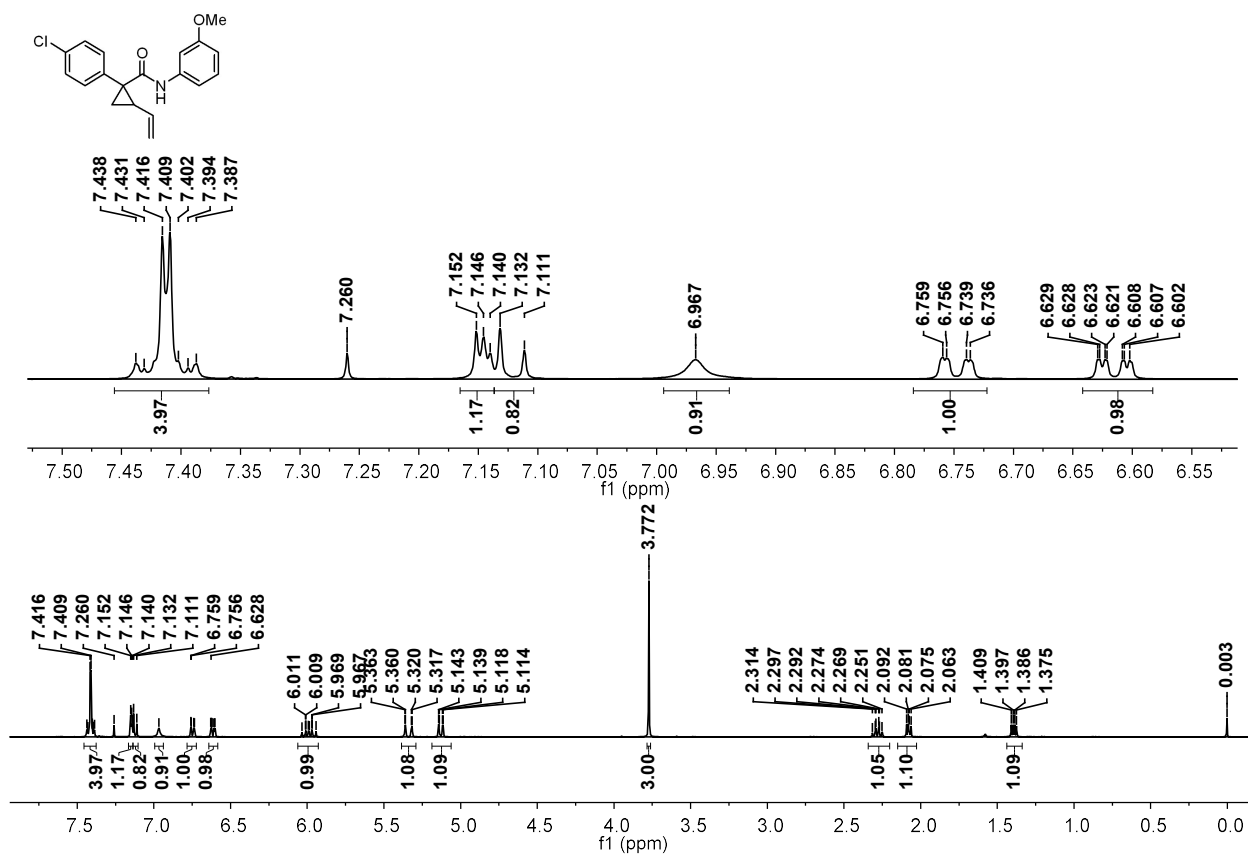

$^{13}\text{C}\{^1\text{H}\}$  NMR spectra of **1d** (101 MHz,  $\text{CDCl}_3$ )

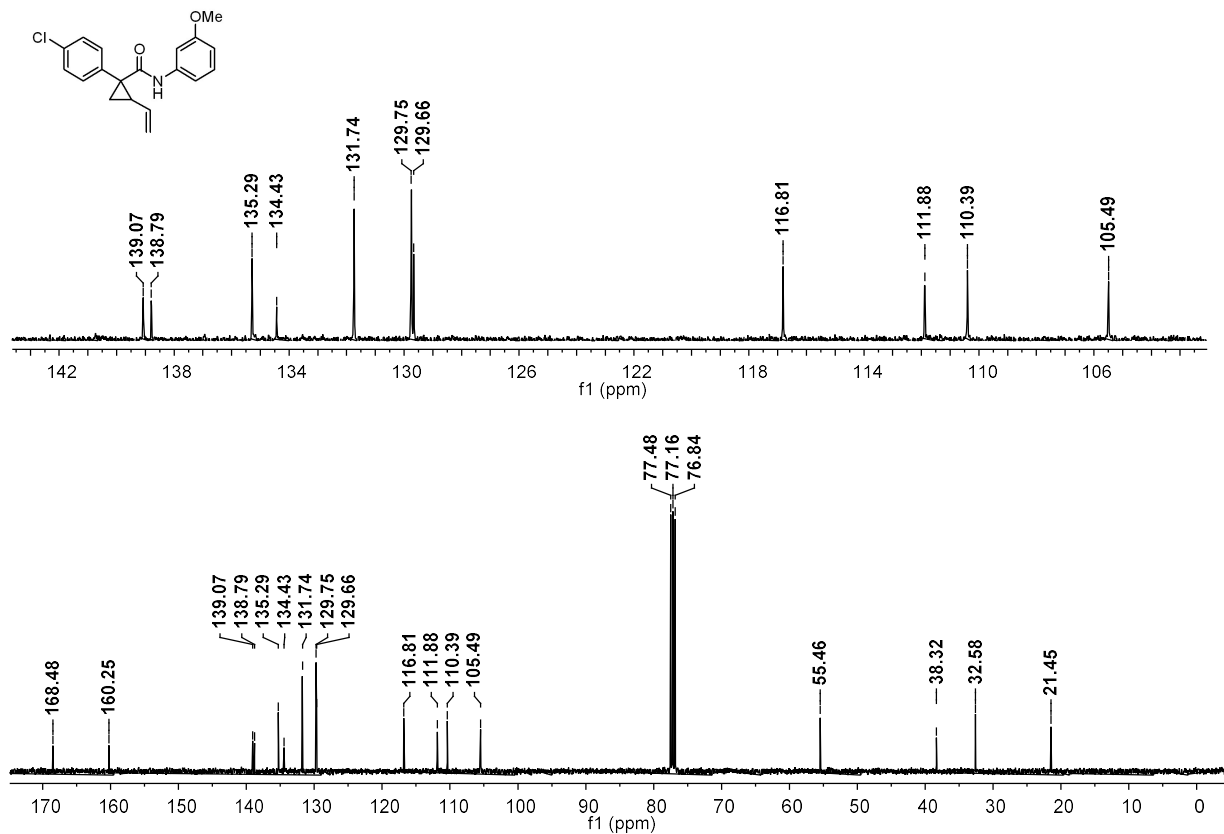

$^1\text{H}$  NMR spectra of **1e** (600 MHz,  $\text{CDCl}_3$ )

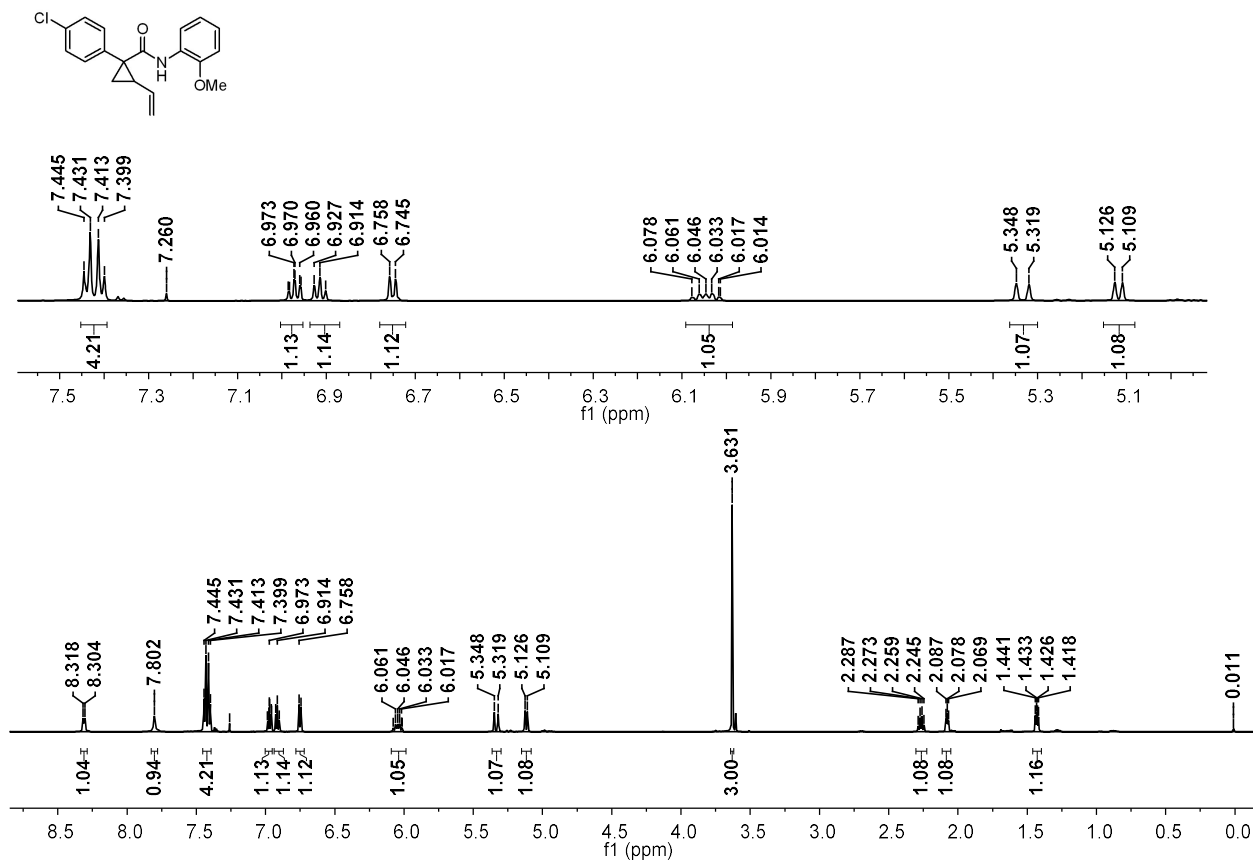

$^{13}\text{C}\{^1\text{H}\}$  NMR spectra of **1e** (151 MHz,  $\text{CDCl}_3$ )

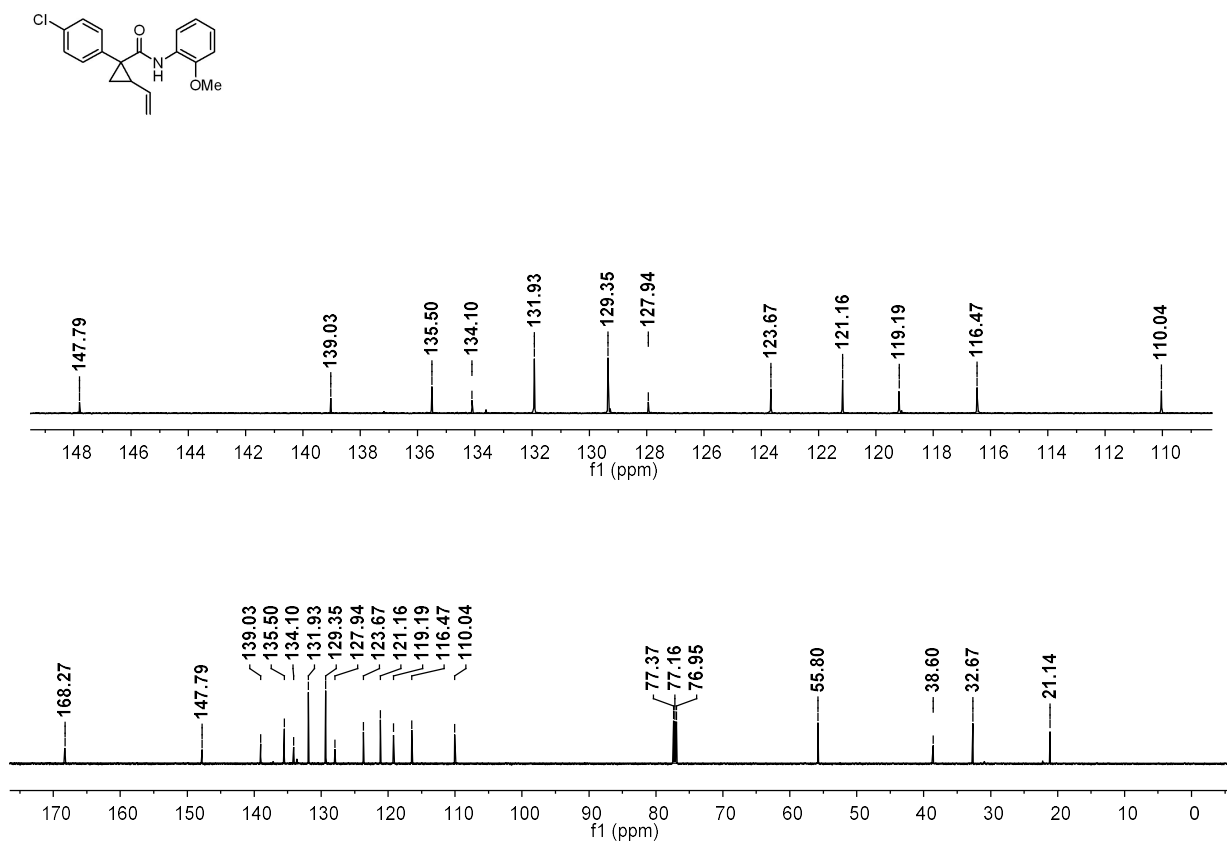

$^1\text{H}$  NMR spectra of **1f** (600 MHz,  $\text{CDCl}_3$ )

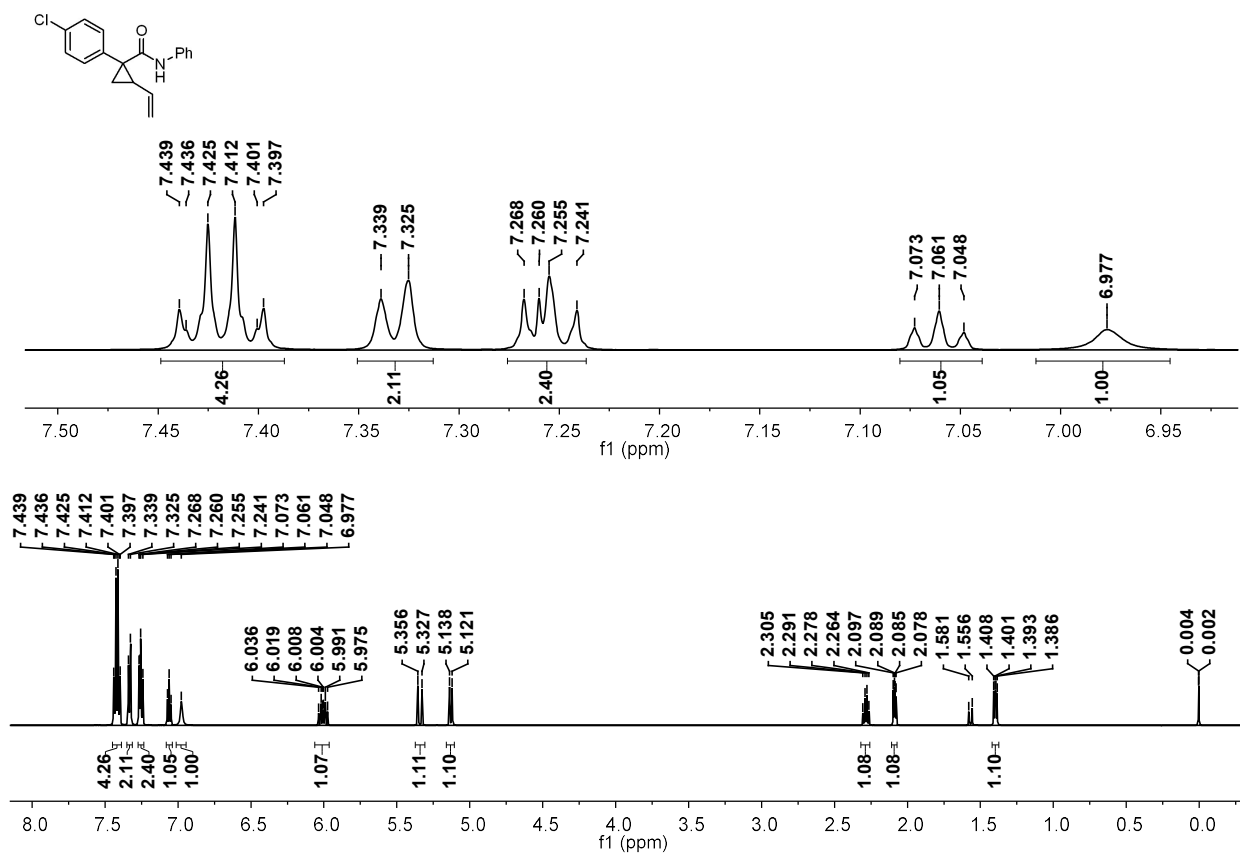

$^{13}\text{C}\{^1\text{H}\}$  NMR spectra of **1f** (151 MHz,  $\text{CDCl}_3$ )

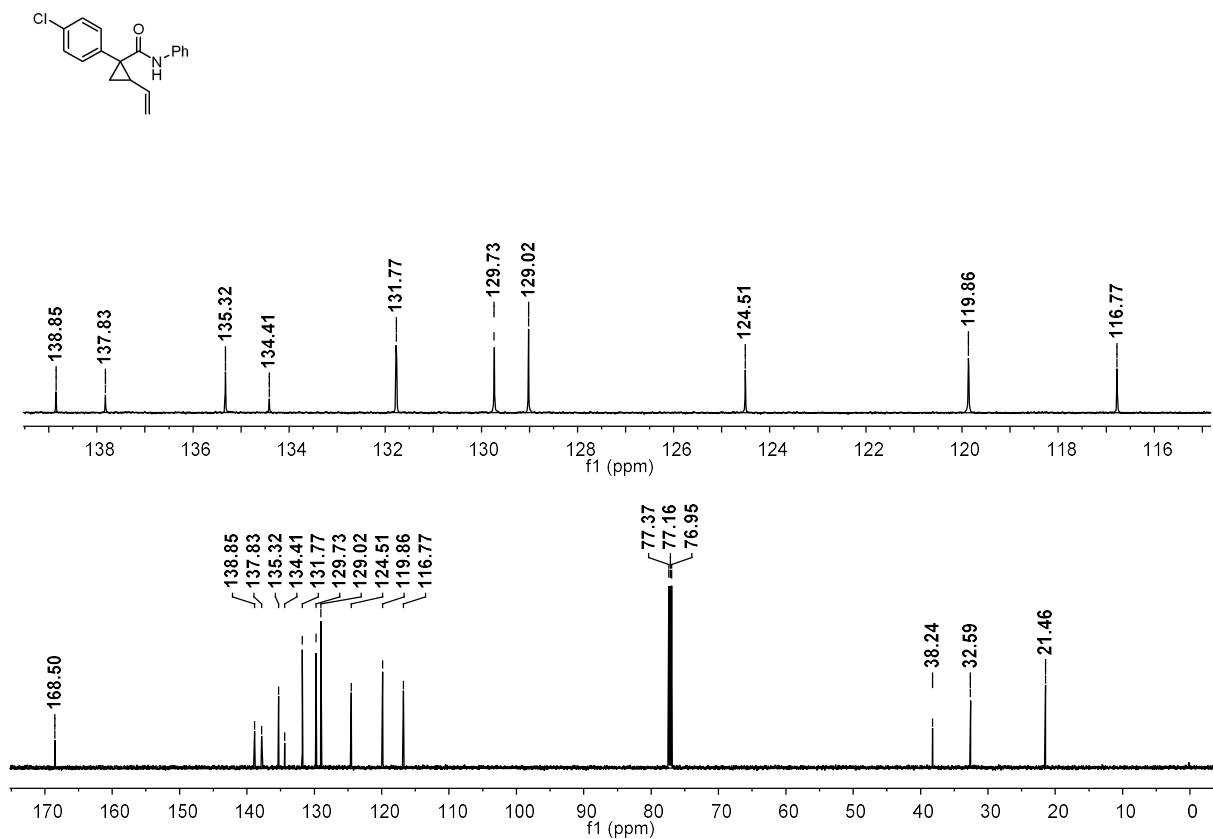



$^1\text{H}$  NMR spectra of **1g** (600 MHz,  $\text{CDCl}_3$ )

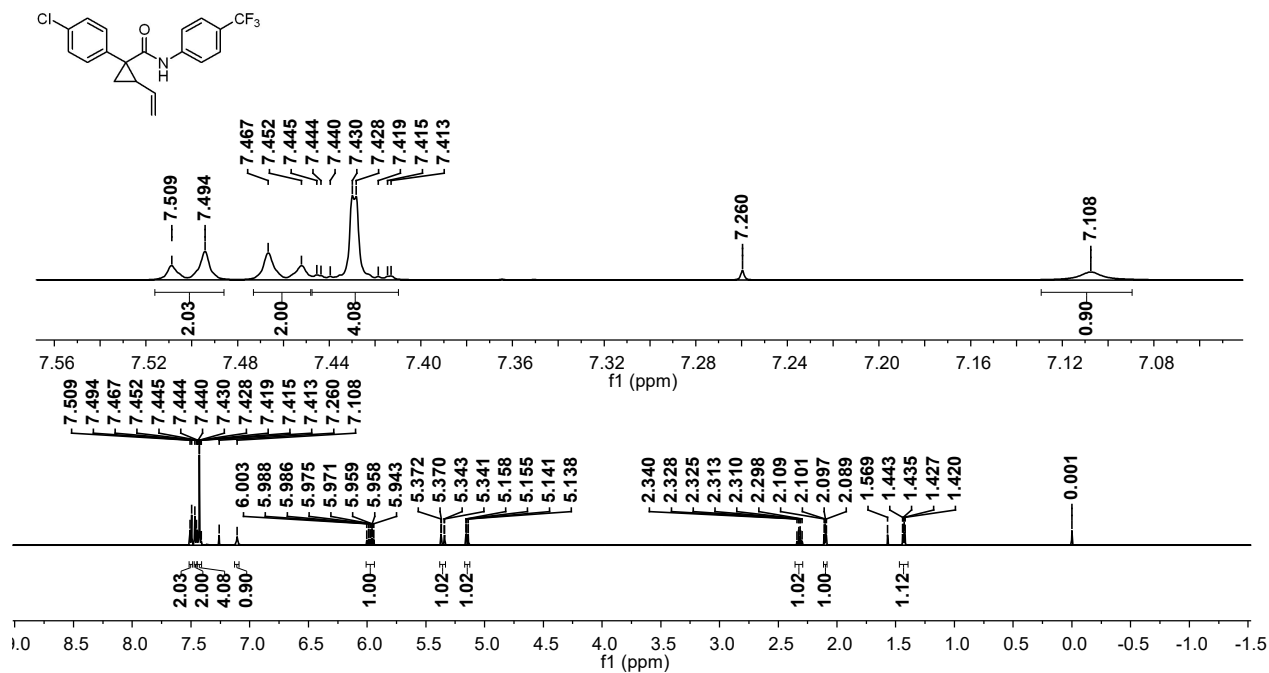

$^{13}\text{C}\{^1\text{H}\}$  NMR spectra of **1g** (101 MHz,  $\text{CDCl}_3$ )

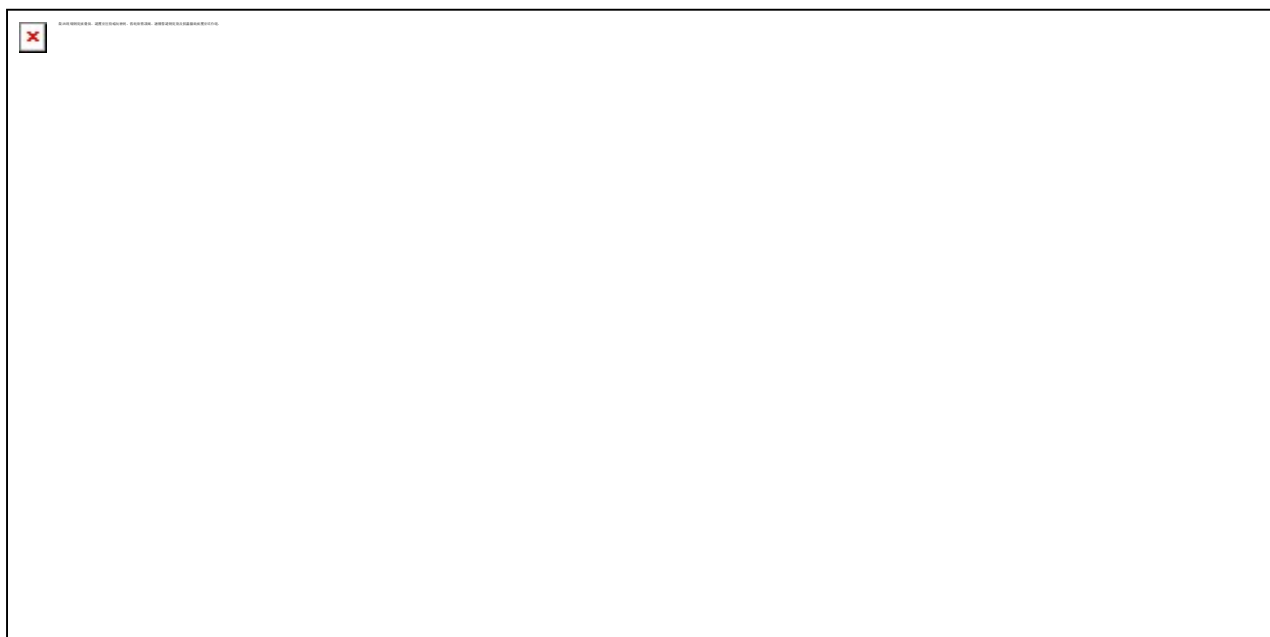

$^{19}\text{F}$  NMR spectra of **1g** (565 MHz,  $\text{CDCl}_3$ )

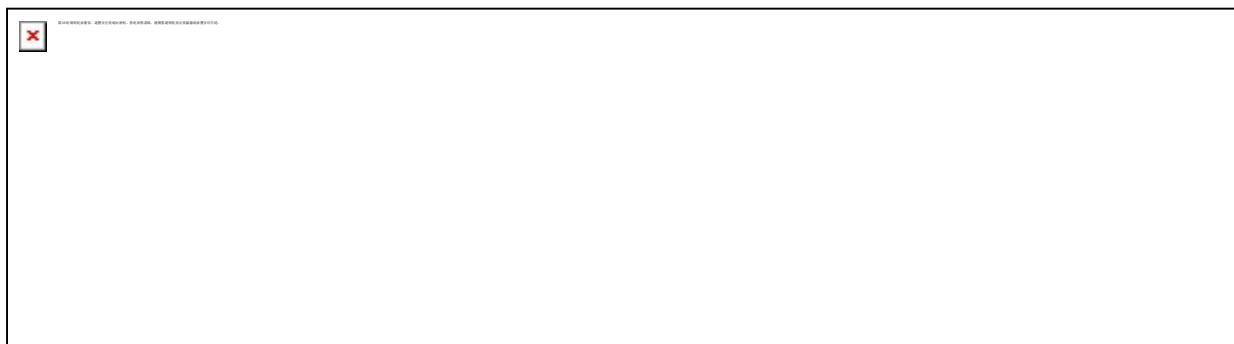

<sup>1</sup>H NMR spectra of **1h** (600 MHz, CDCl<sub>3</sub>)

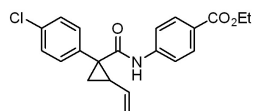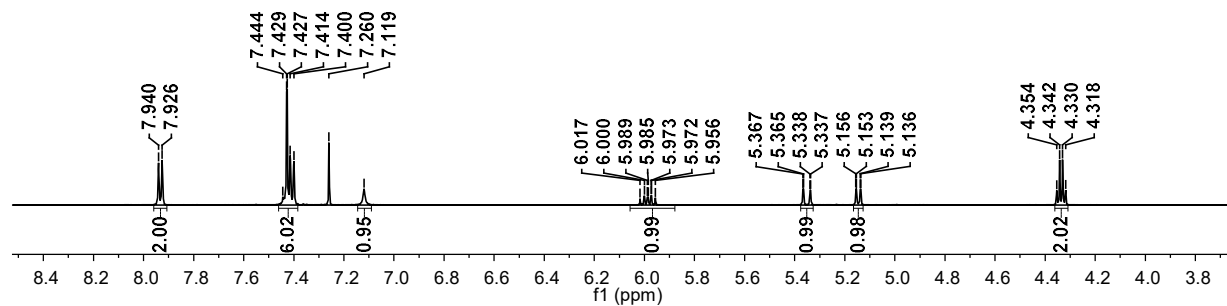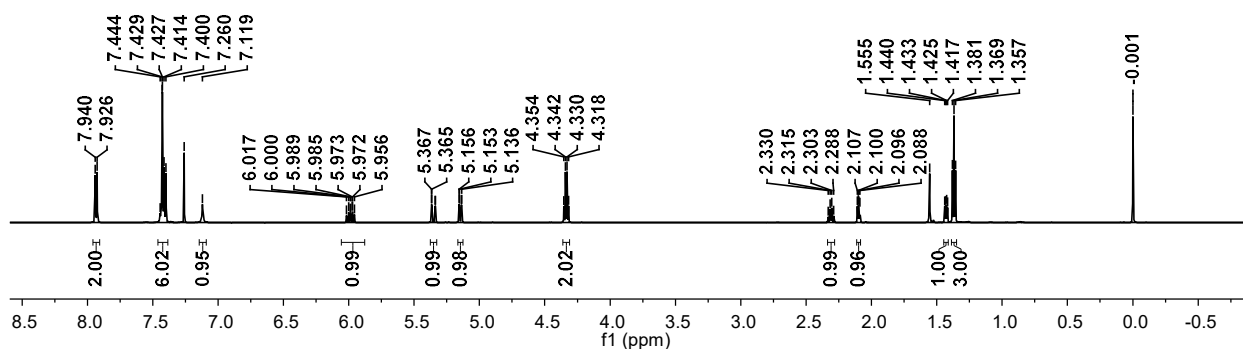

<sup>13</sup>C {<sup>1</sup>H} NMR spectra of **1h** (151 MHz, CDCl<sub>3</sub>)

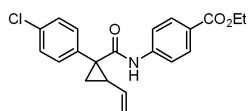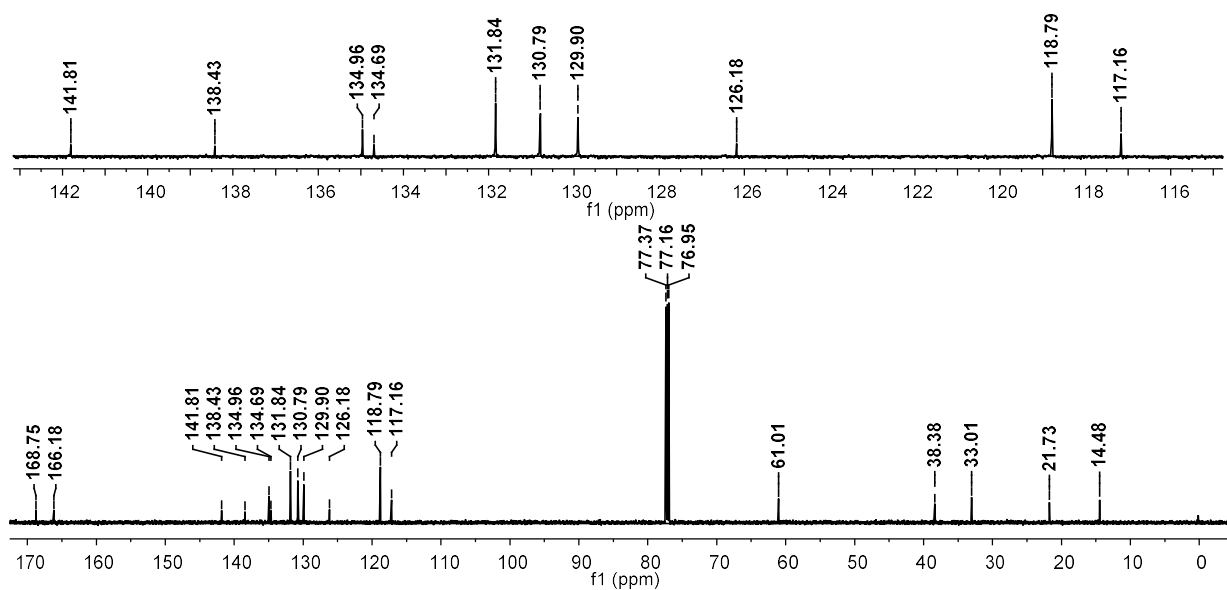

$^1\text{H}$  NMR spectra of **1i** (600 MHz,  $\text{CDCl}_3$ )

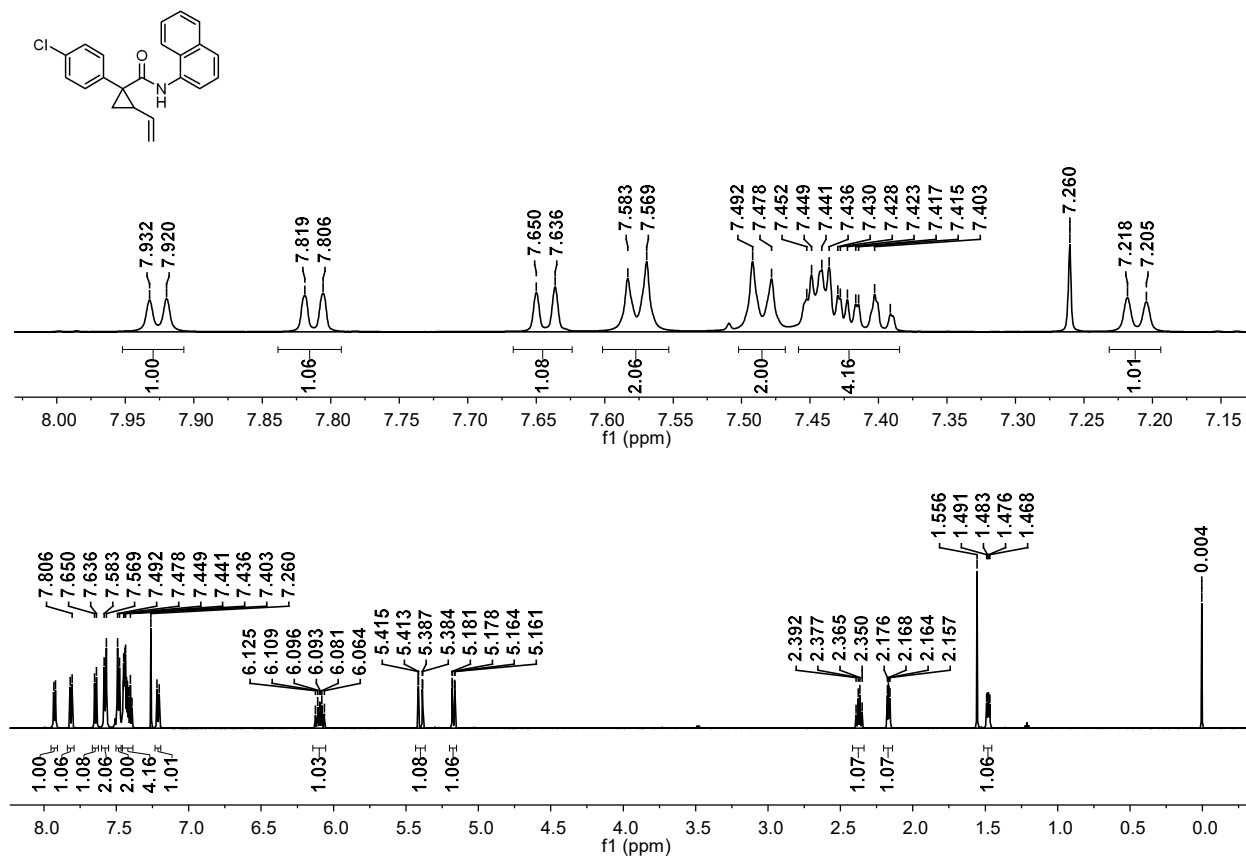

$^{13}\text{C}\{^1\text{H}\}$  NMR spectra of **1i** (151 MHz,  $\text{CDCl}_3$ )

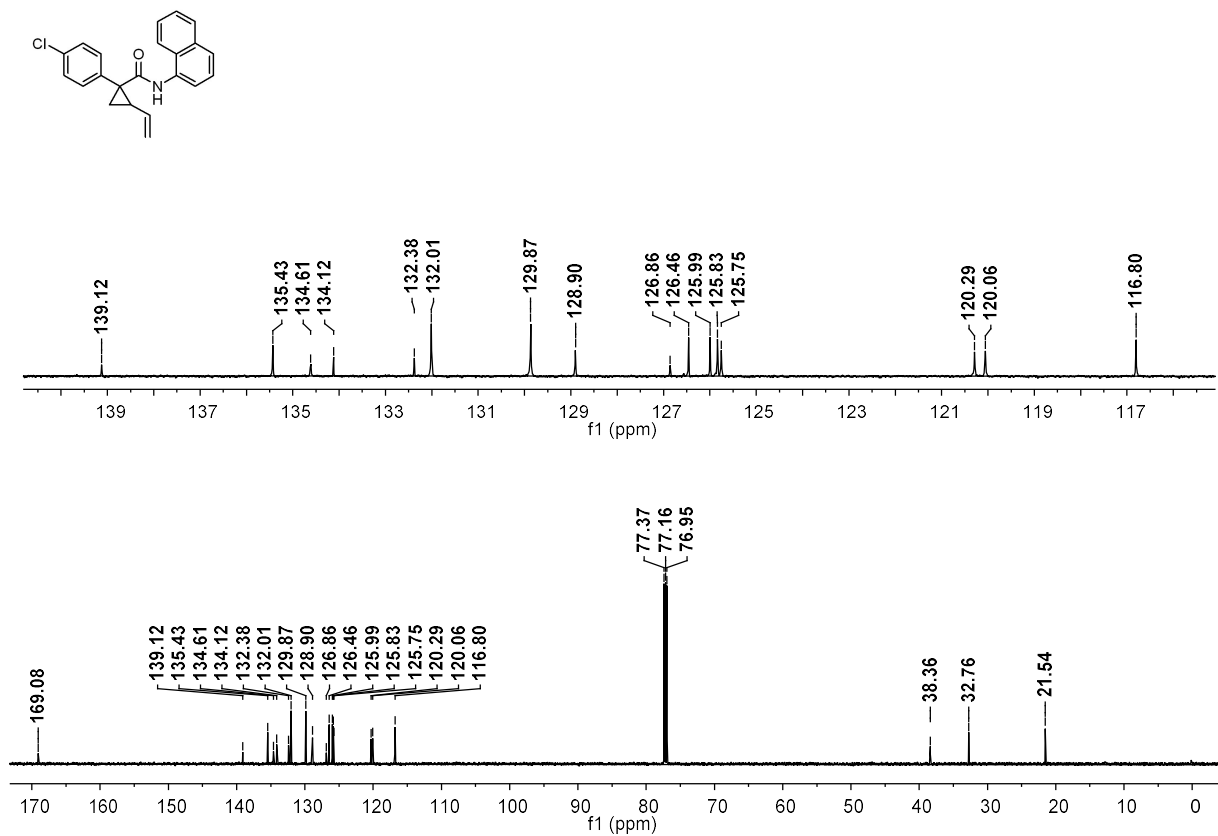

$^1\text{H}$  NMR spectra of **1j** (600 MHz,  $\text{CDCl}_3$ )

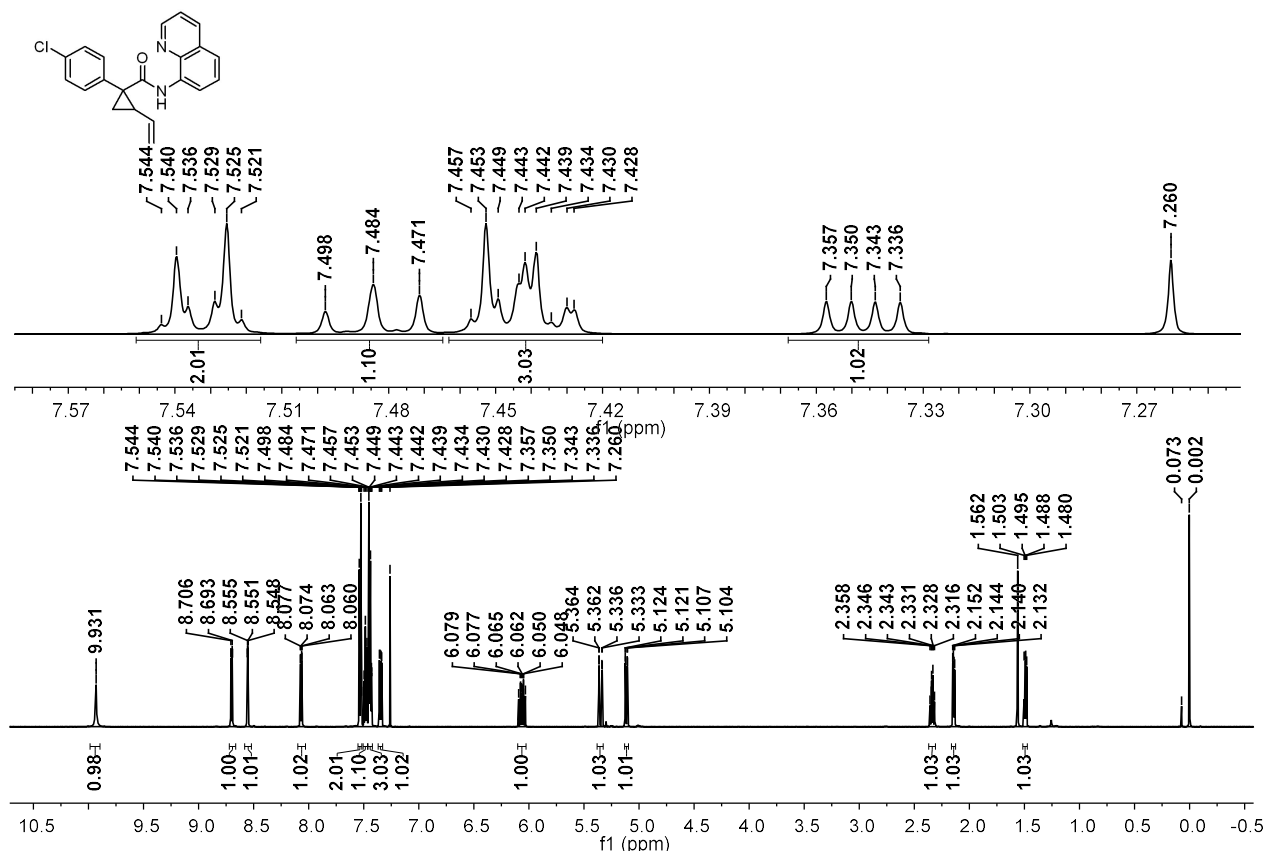

$^{13}\text{C}\{^1\text{H}\}$  NMR spectra of **1j** (151 MHz,  $\text{CDCl}_3$ )

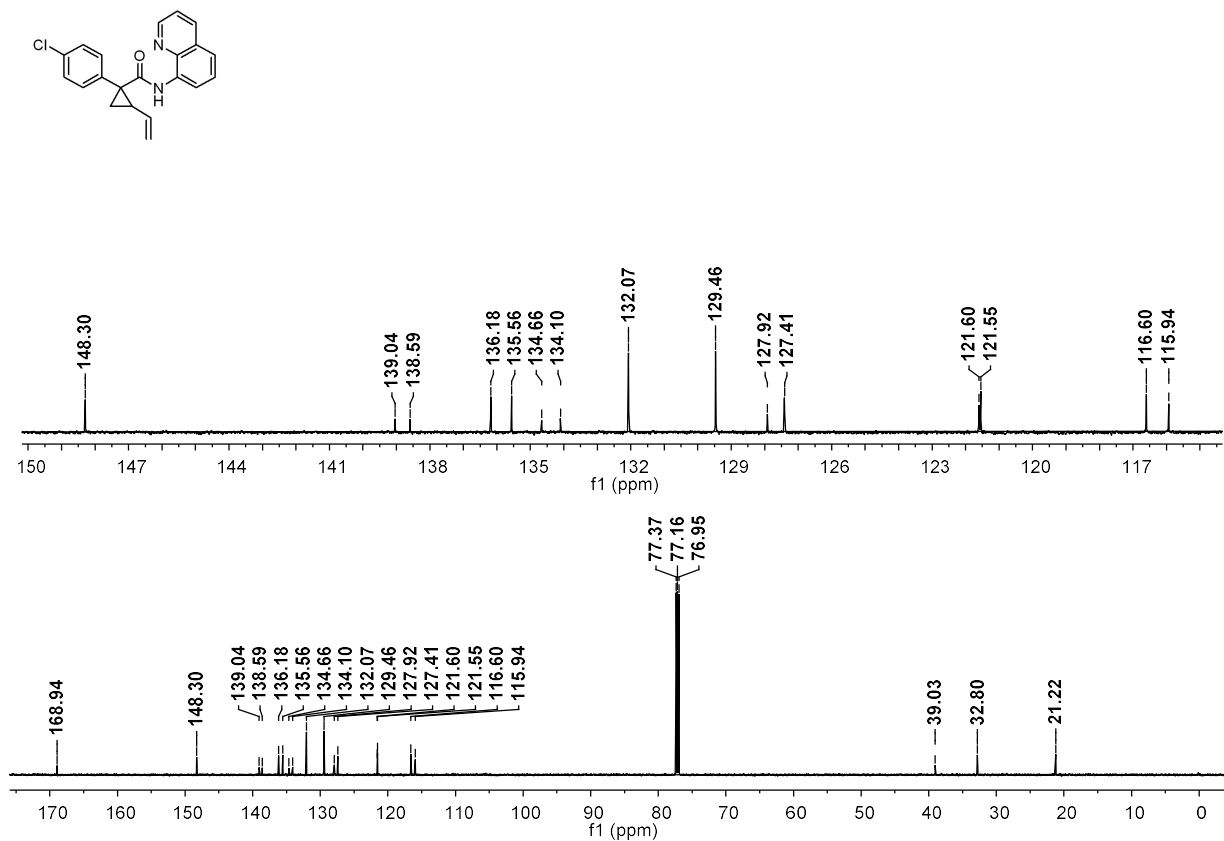

$^1\text{H}$  NMR spectra of **1k** (400 MHz,  $\text{CDCl}_3$ )

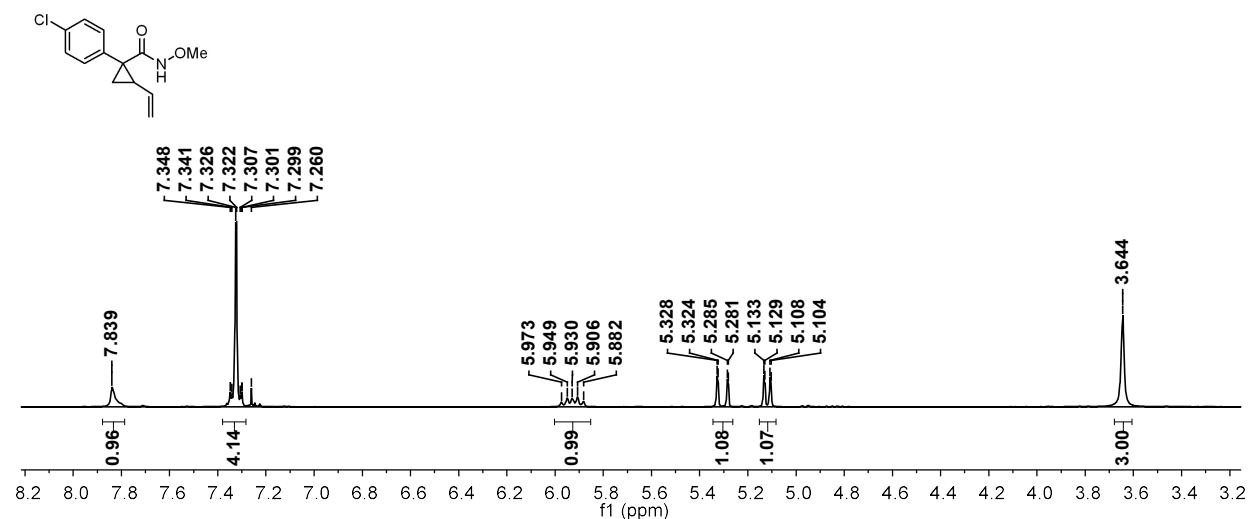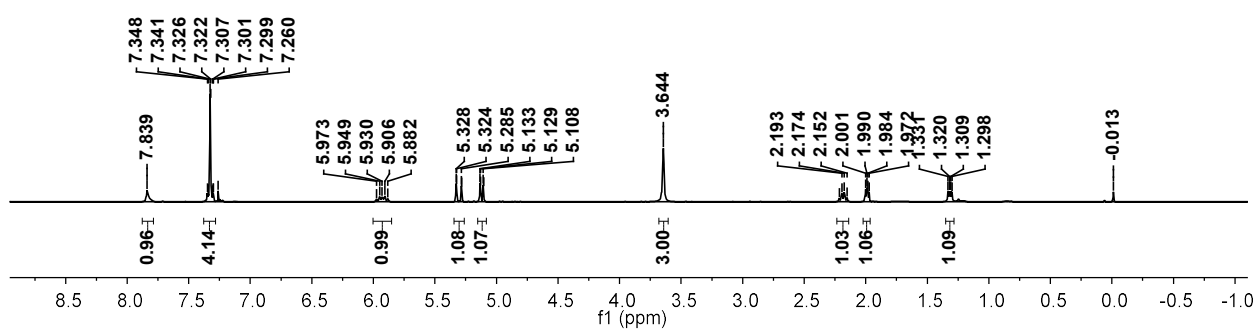

$^{13}\text{C}\{^1\text{H}\}$  NMR spectra of **1k** (101 MHz,  $\text{CDCl}_3$ )

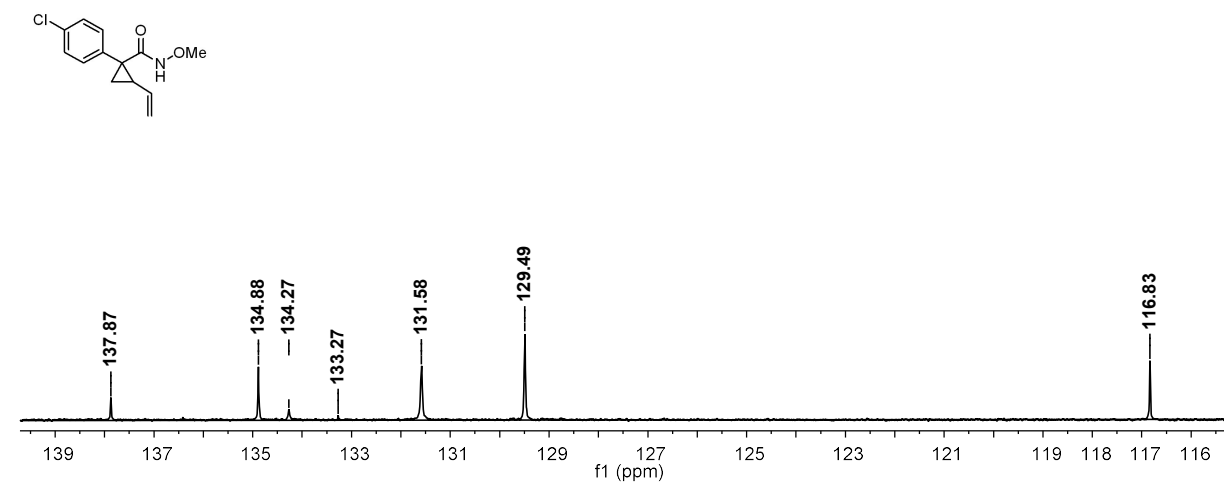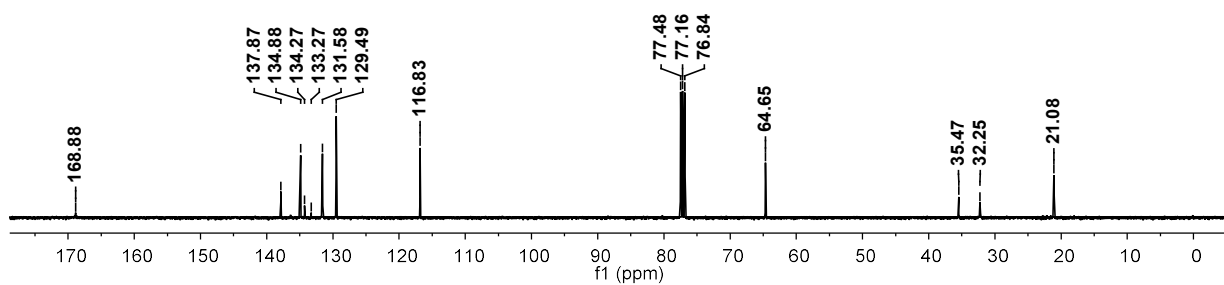

$^1\text{H}$  NMR spectra of **II** (600 MHz,  $\text{CDCl}_3$ )

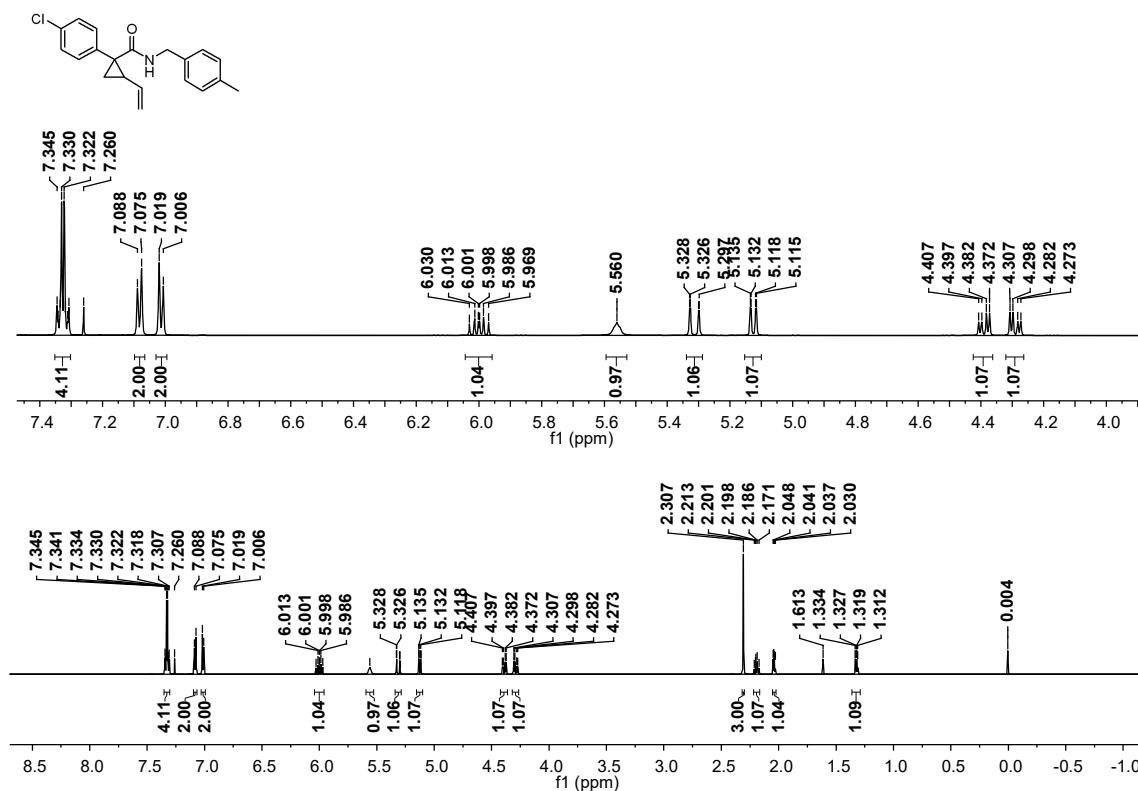

$^{13}\text{C}\{^1\text{H}\}$  NMR spectra of **II** (151 MHz,  $\text{CDCl}_3$ )

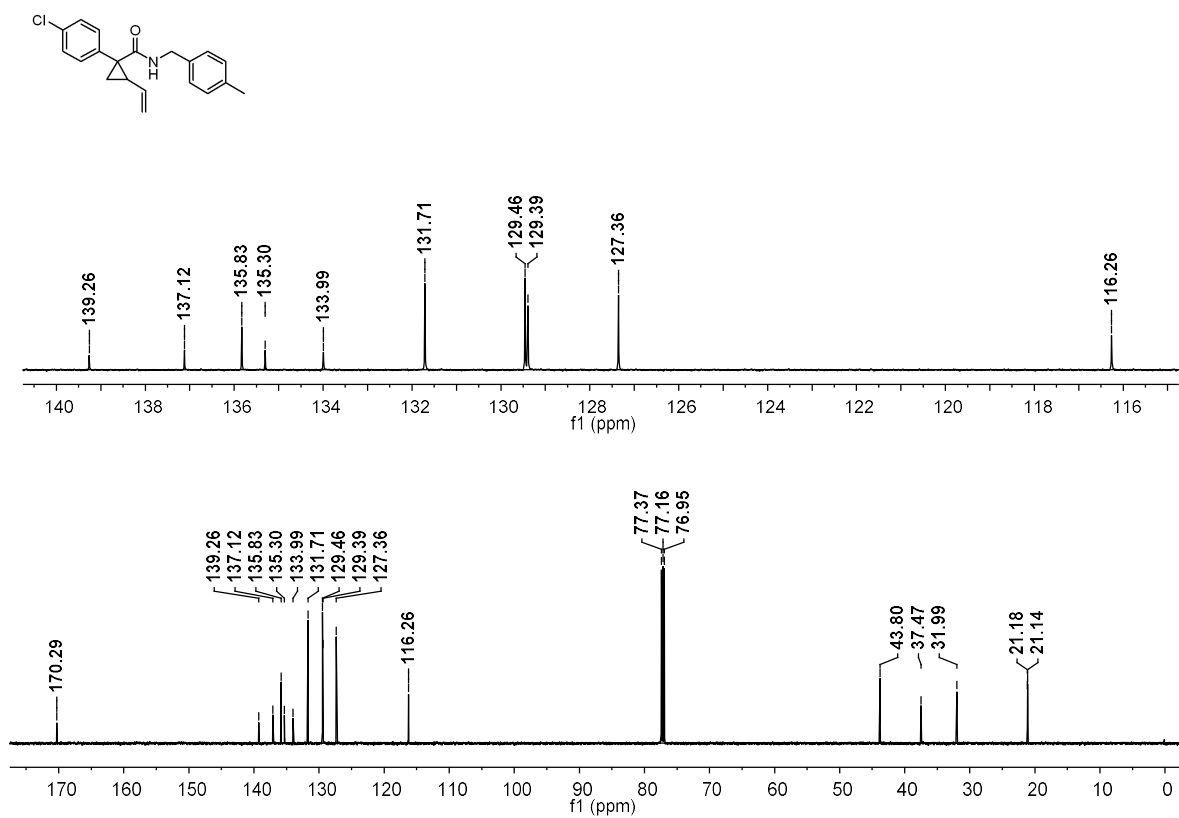

$^1\text{H}$  NMR spectra of **1m** (400 MHz,  $\text{CDCl}_3$ )

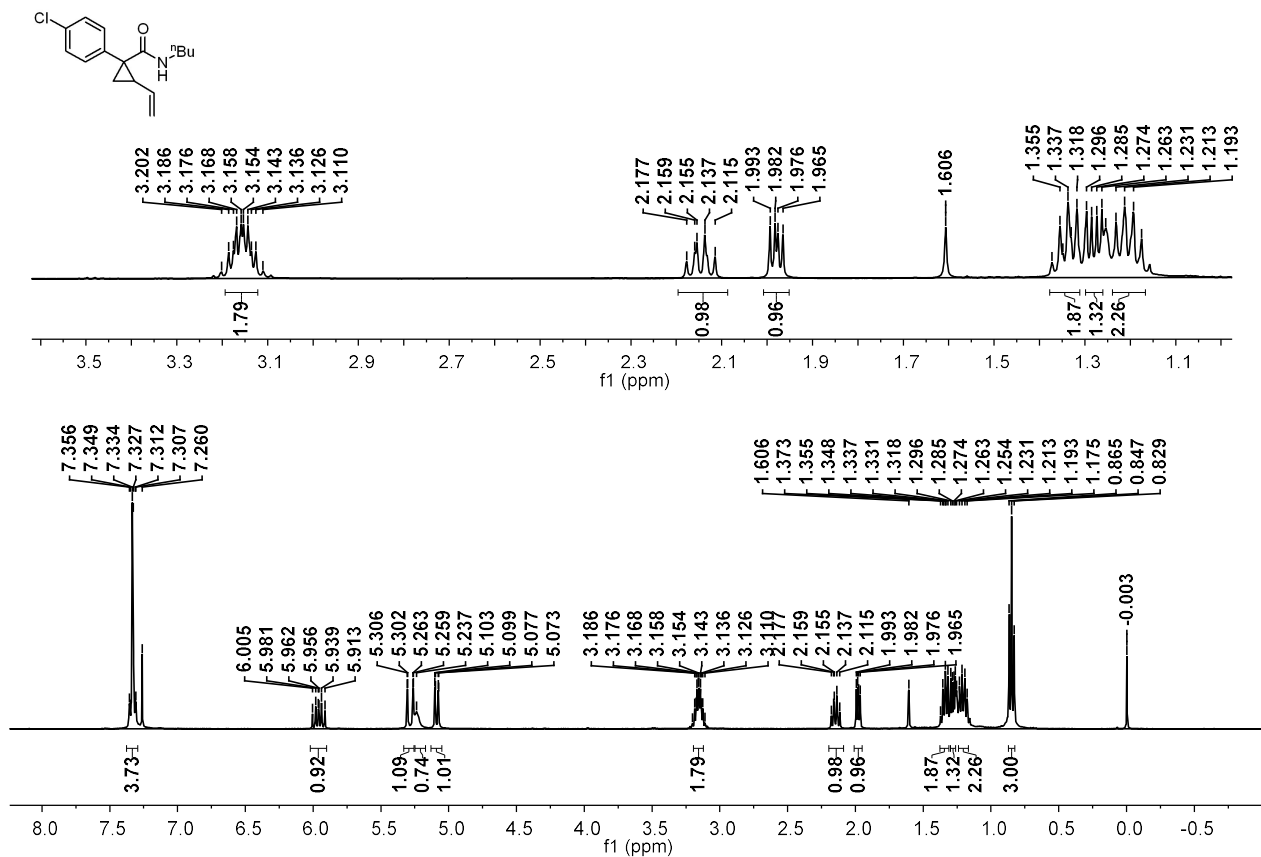

$^{13}\text{C}\{^1\text{H}\}$  NMR spectra of **1m** (101 MHz,  $\text{CDCl}_3$ )

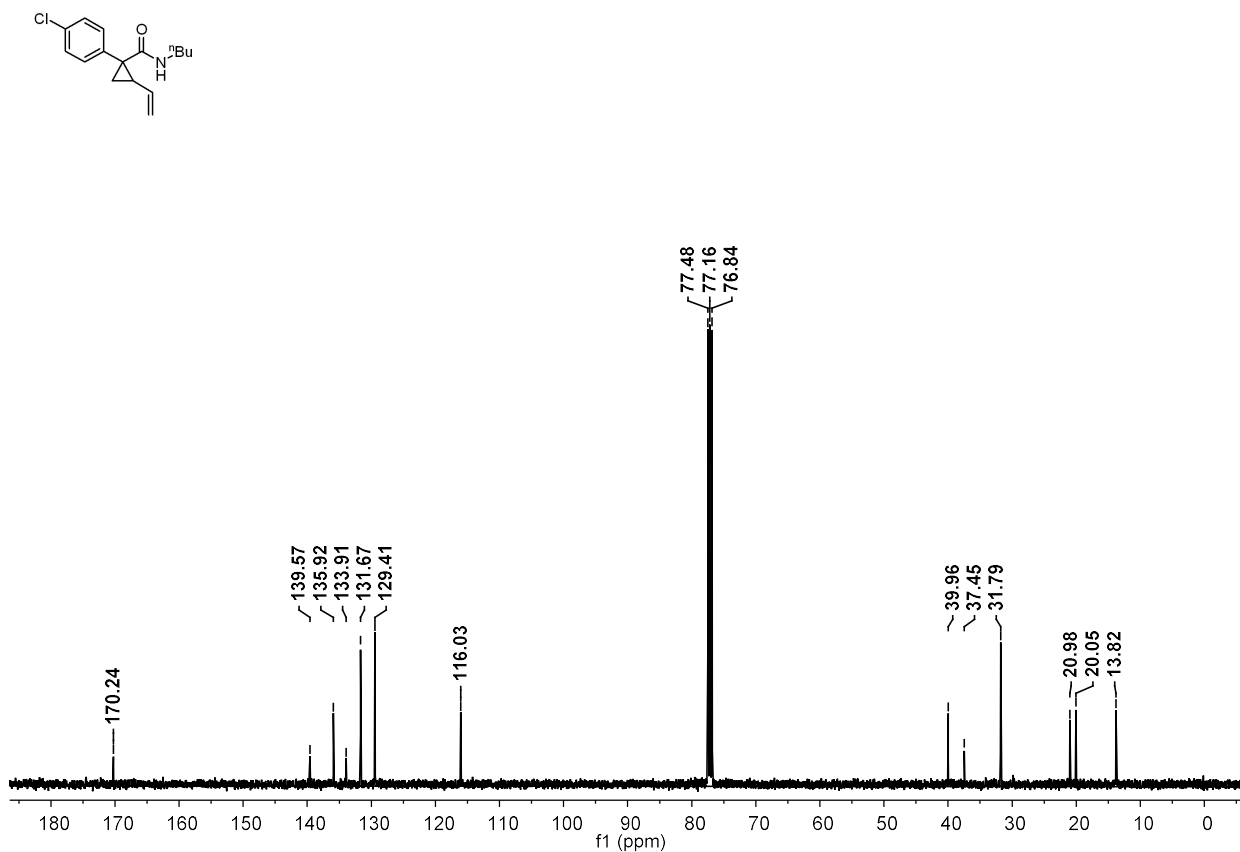

$^1\text{H}$  NMR spectra of **1n** (600 MHz,  $\text{CDCl}_3$ )

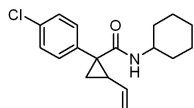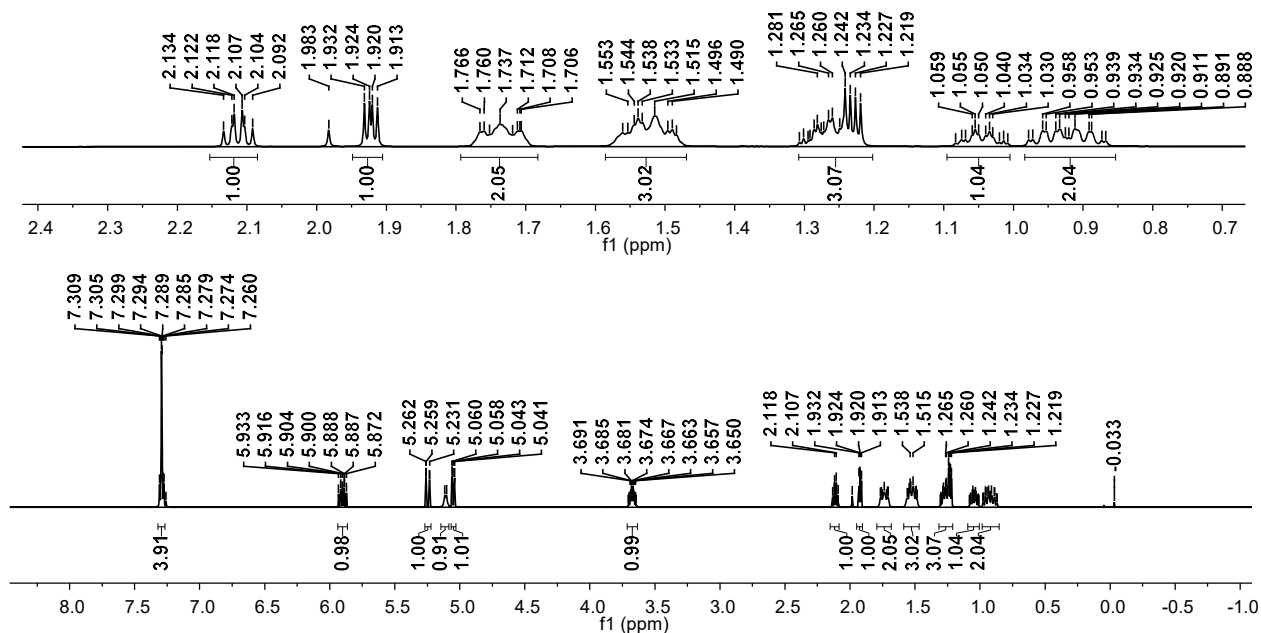

$^{13}\text{C}\{^1\text{H}\}$  NMR spectra of **1n** (151 MHz,  $\text{CDCl}_3$ )

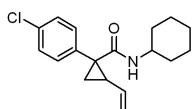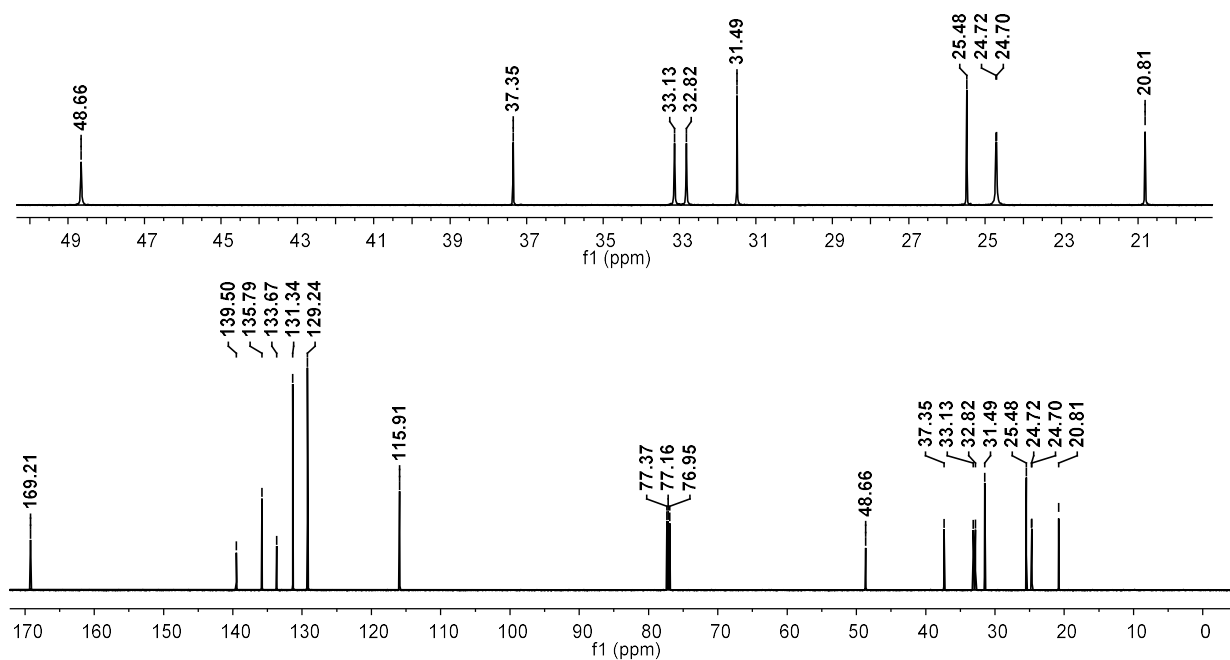



$^1\text{H}$  NMR spectra of **1o** (400 MHz,  $\text{CDCl}_3$ )

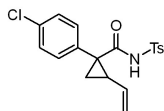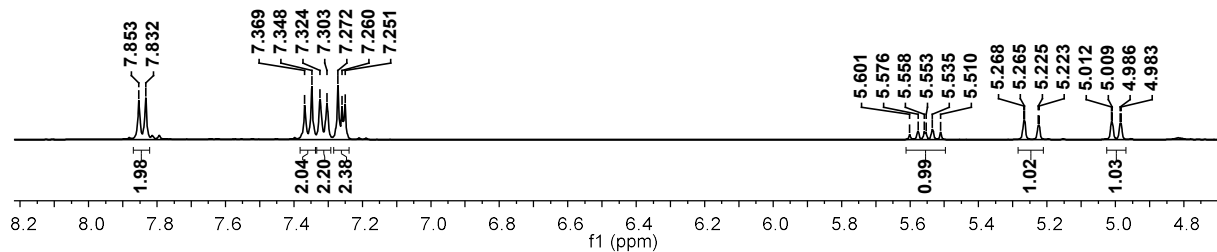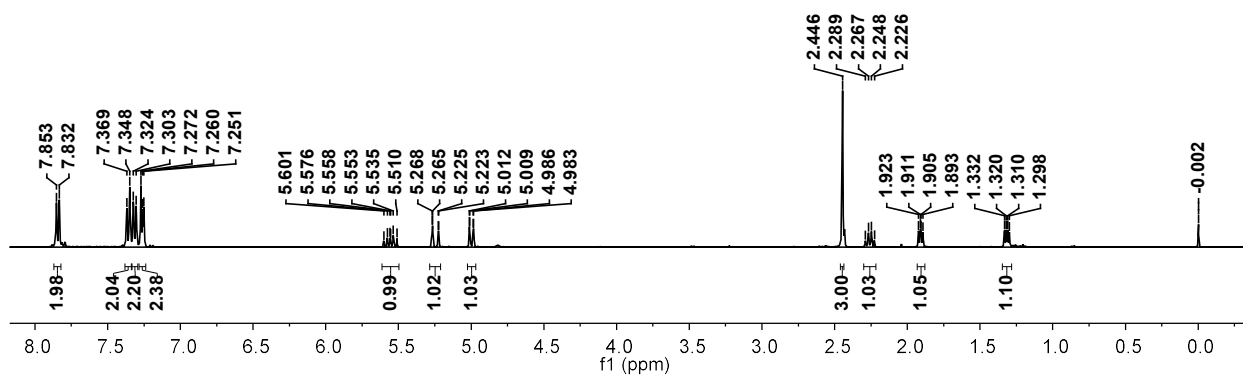

$^{13}\text{C}\{^1\text{H}\}$  NMR spectra of **1o** (101 MHz,  $\text{CDCl}_3$ )

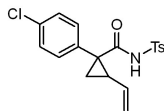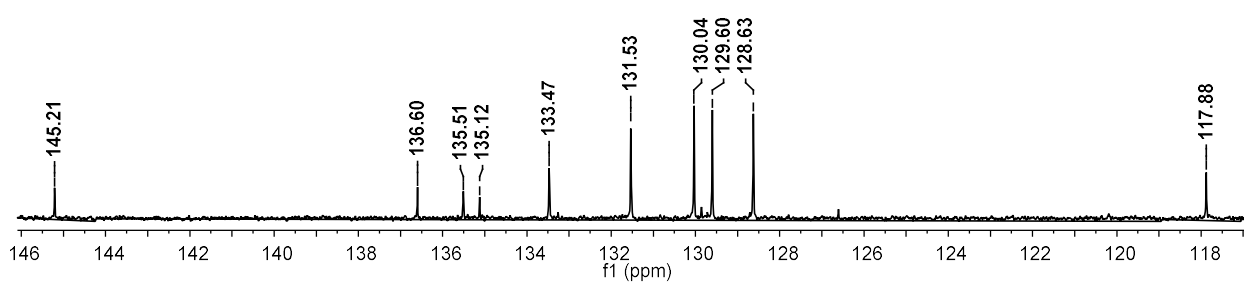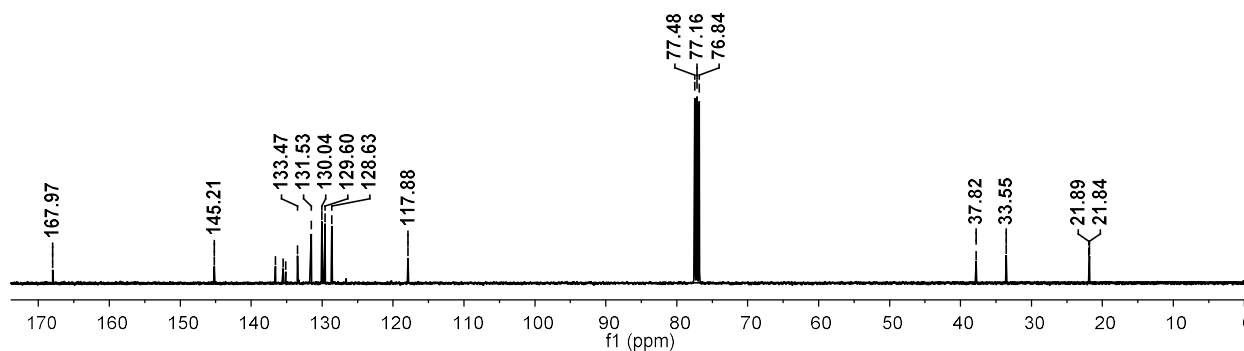

$^1\text{H}$  NMR spectra of **1p** (400 MHz,  $\text{CDCl}_3$ )

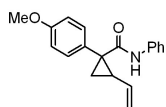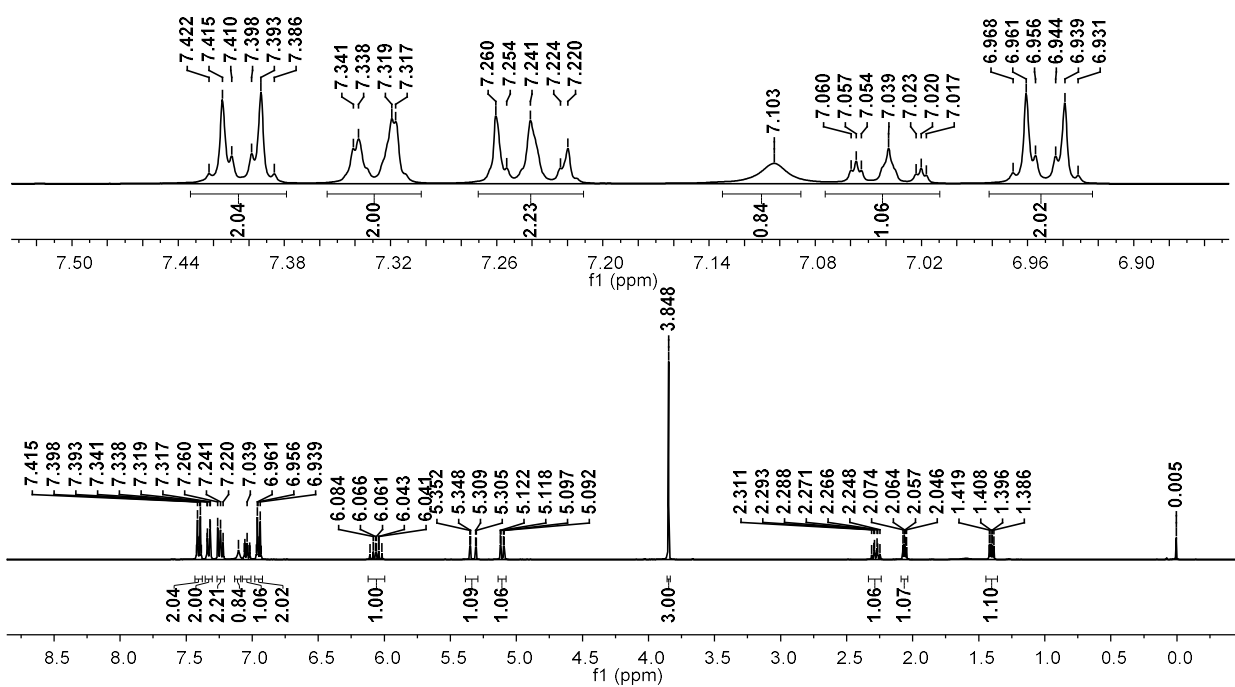

$^{13}\text{C}\{^1\text{H}\}$  NMR spectra of **1p** (101 MHz,  $\text{CDCl}_3$ )

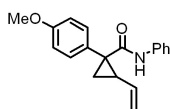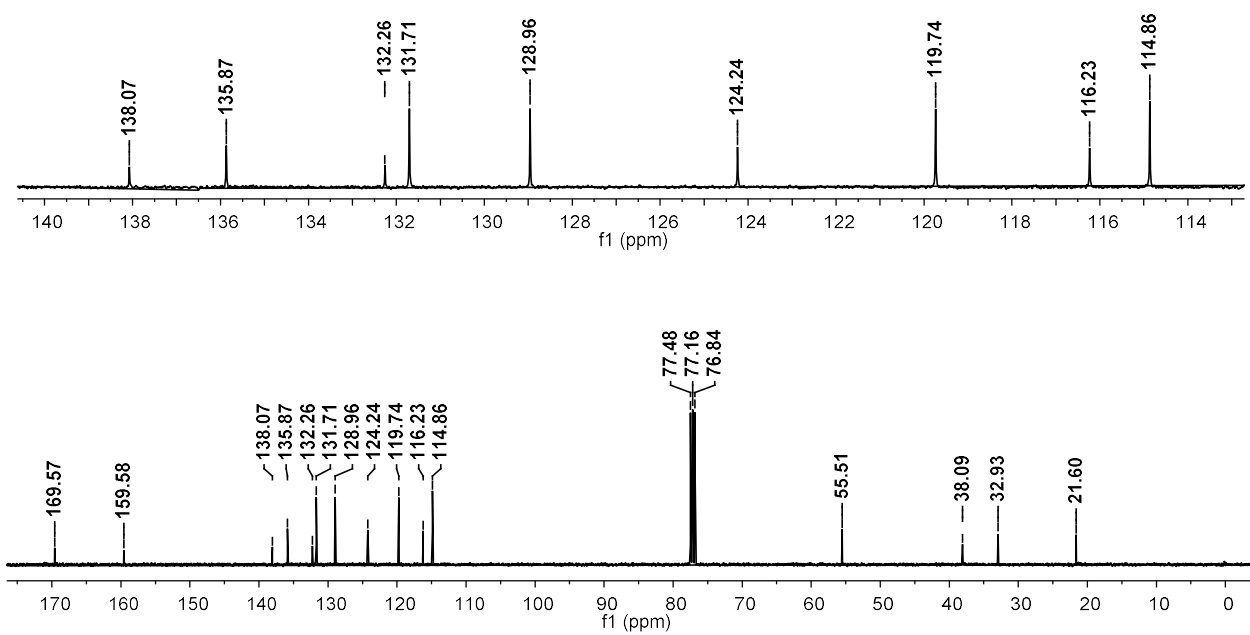

$^{13}\text{C}$  NMR spectra of **1q** (600 MHz,  $\text{CDCl}_3$ )

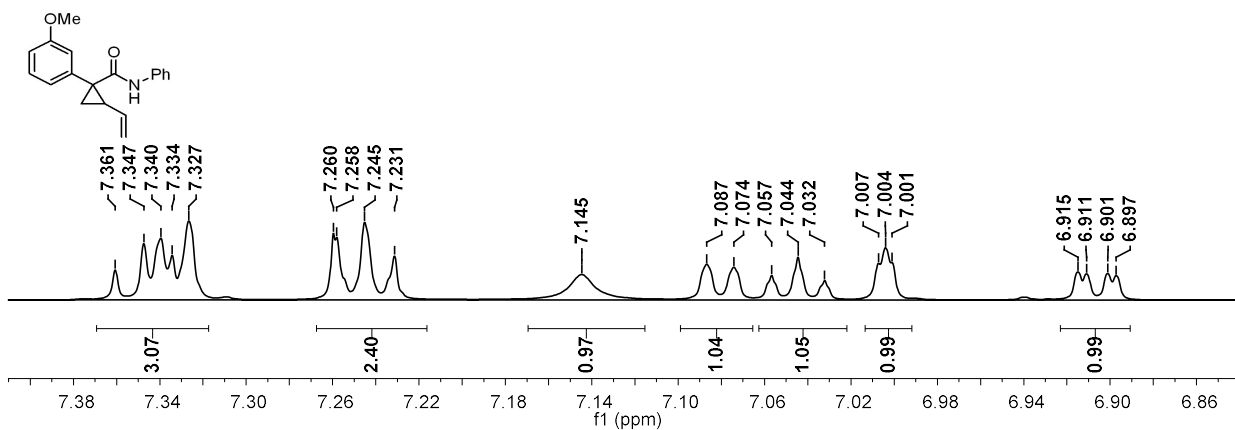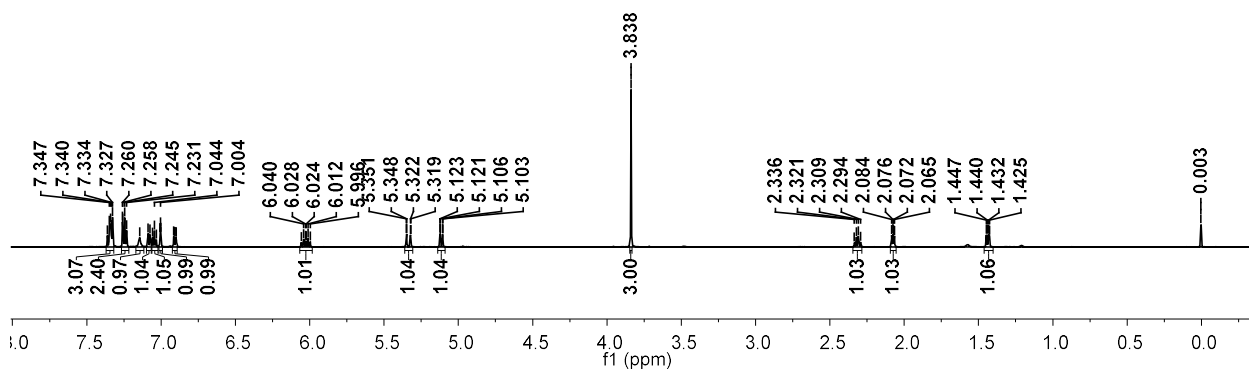

<sup>13</sup>C{<sup>1</sup>H} NMR spectra of **1q** (151 MHz, CDCl<sub>3</sub>)

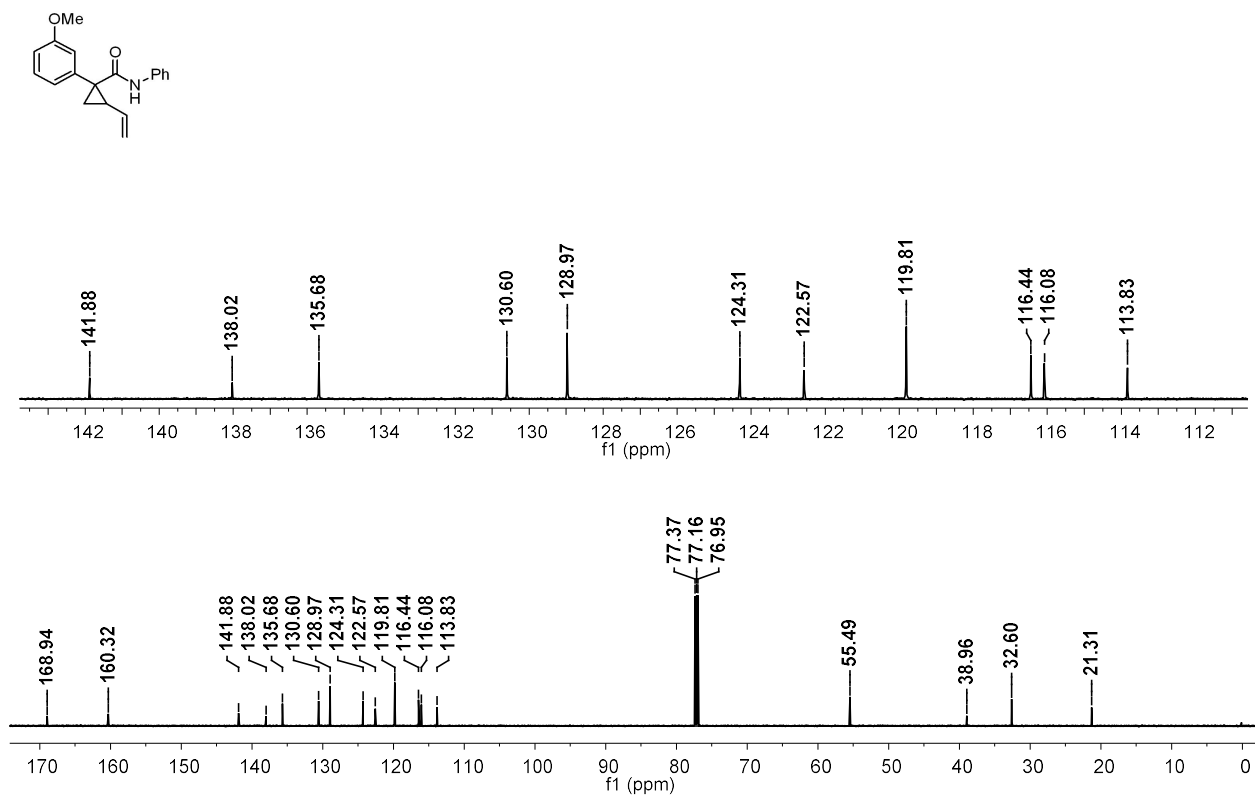

$^1\text{H}$  NMR spectra of **1r** (600 MHz,  $\text{CDCl}_3$ )

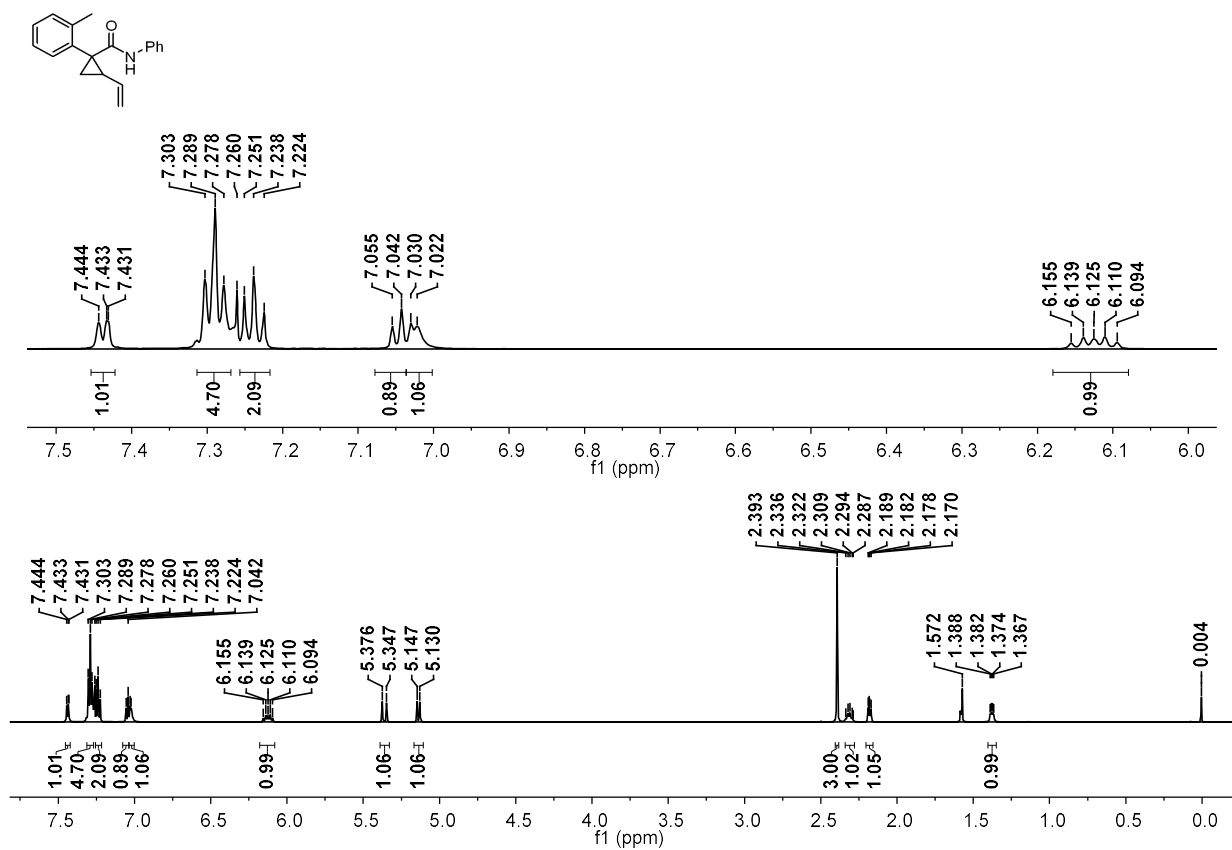

$^{13}\text{C}\{^1\text{H}\}$  NMR spectra of **1r** (151 MHz,  $\text{CDCl}_3$ )

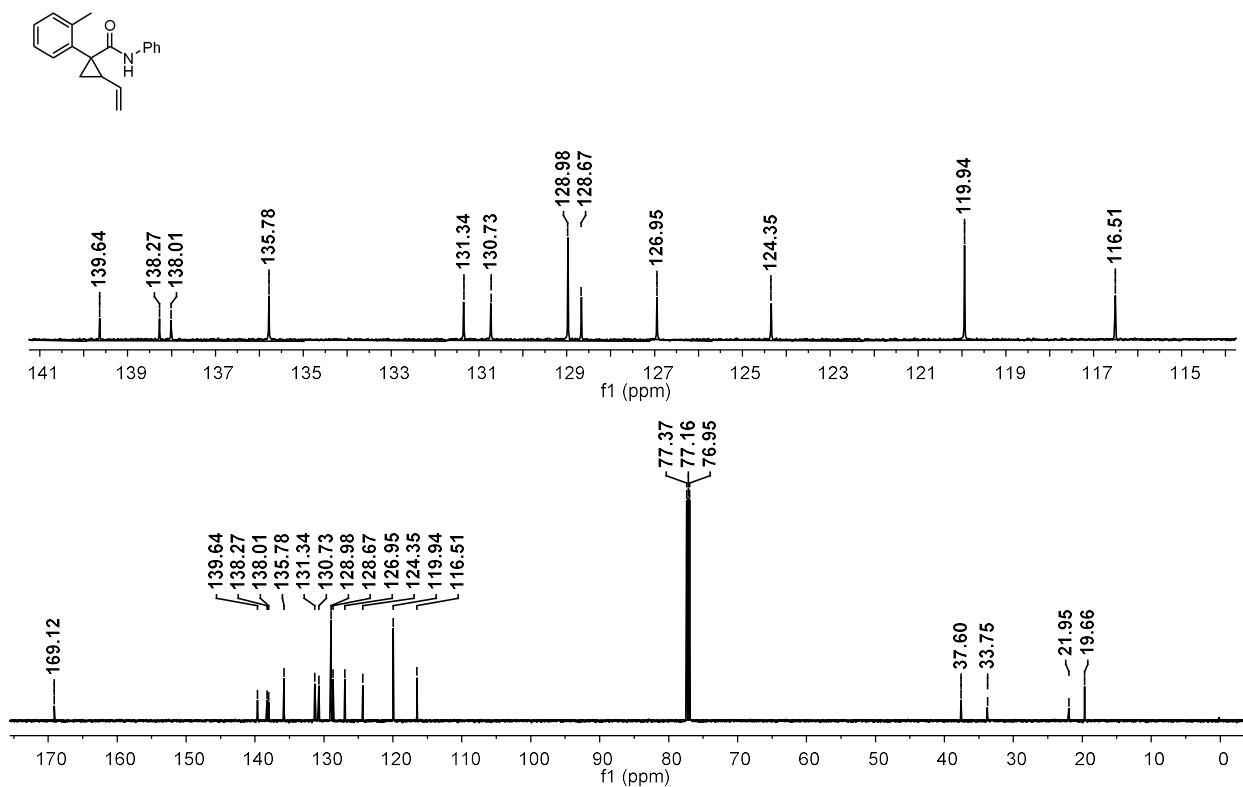

$^1\text{H}$  NMR spectra of **1s** (400 MHz,  $\text{CDCl}_3$ )

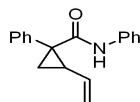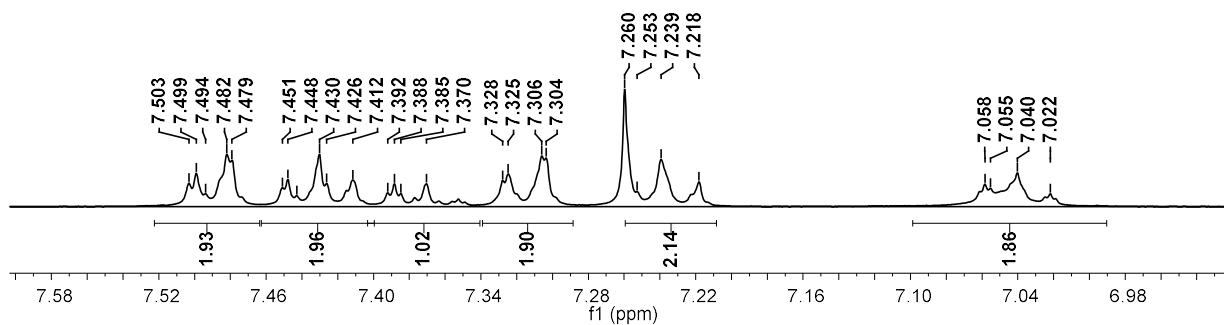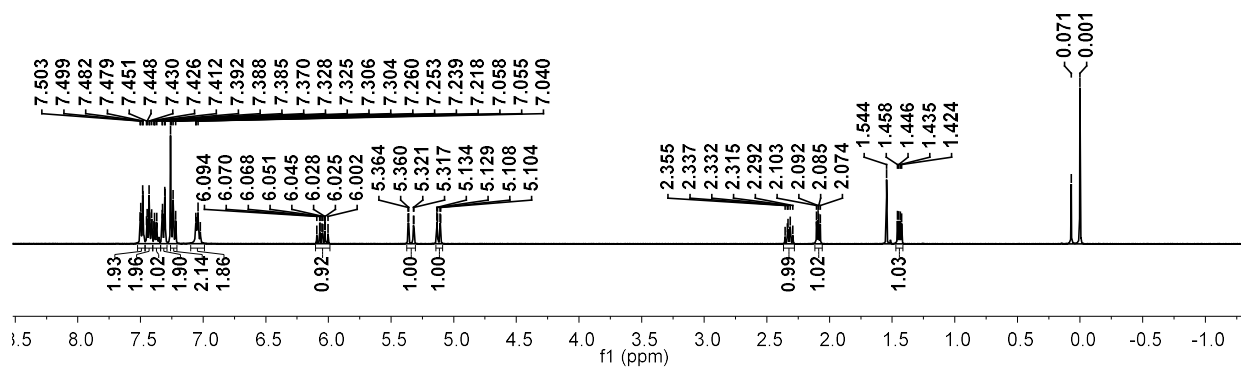

$^{13}\text{C}\{^1\text{H}\}$  NMR spectra of **1s** (101 MHz,  $\text{CDCl}_3$ )

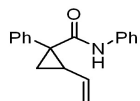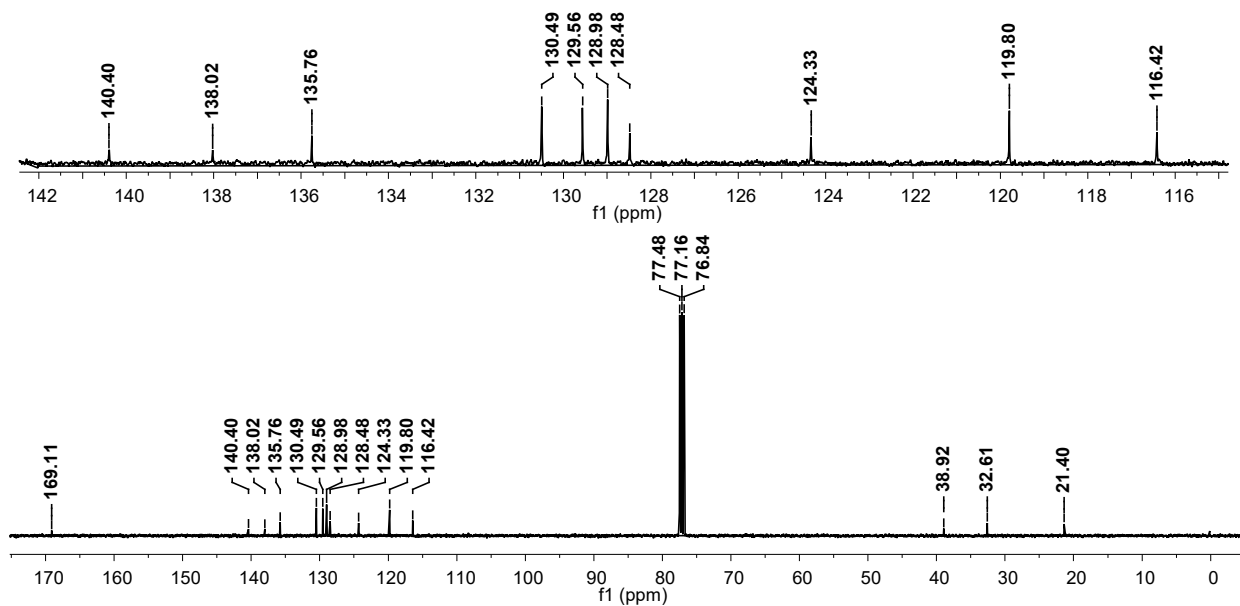

<sup>1</sup>H NMR spectra of **1t** (400 MHz, CDCl<sub>3</sub>)

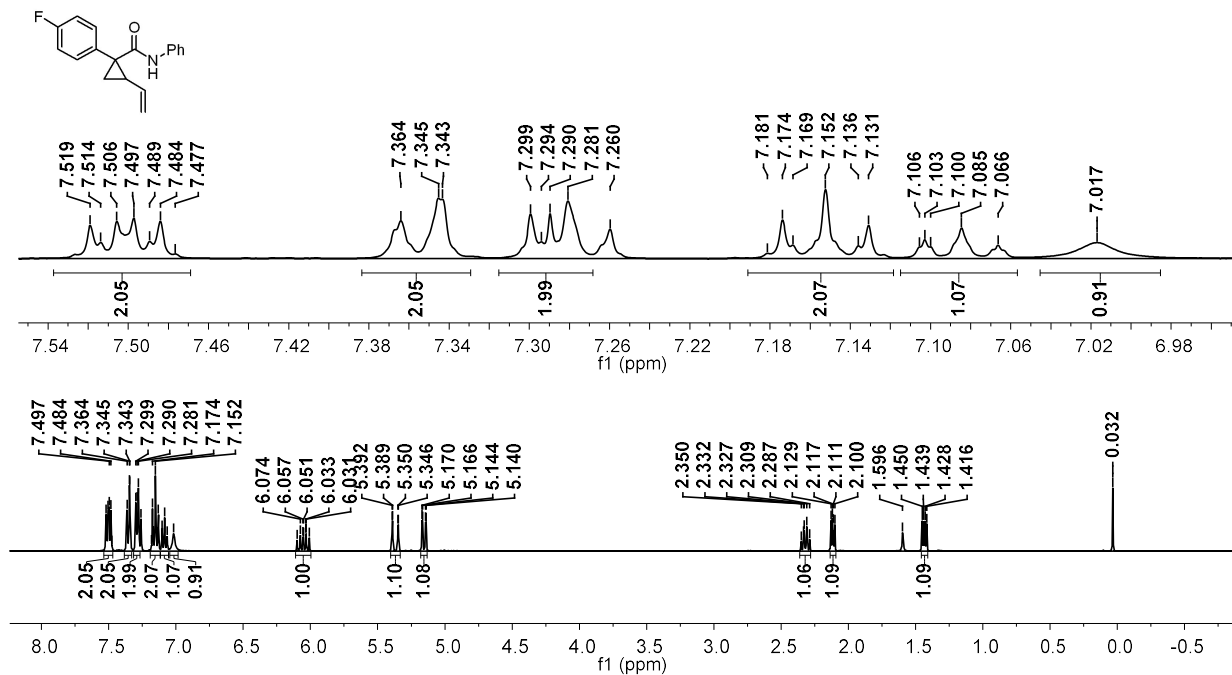

<sup>13</sup>C{<sup>1</sup>H} NMR spectra of **1t** (101 MHz, CDCl<sub>3</sub>)

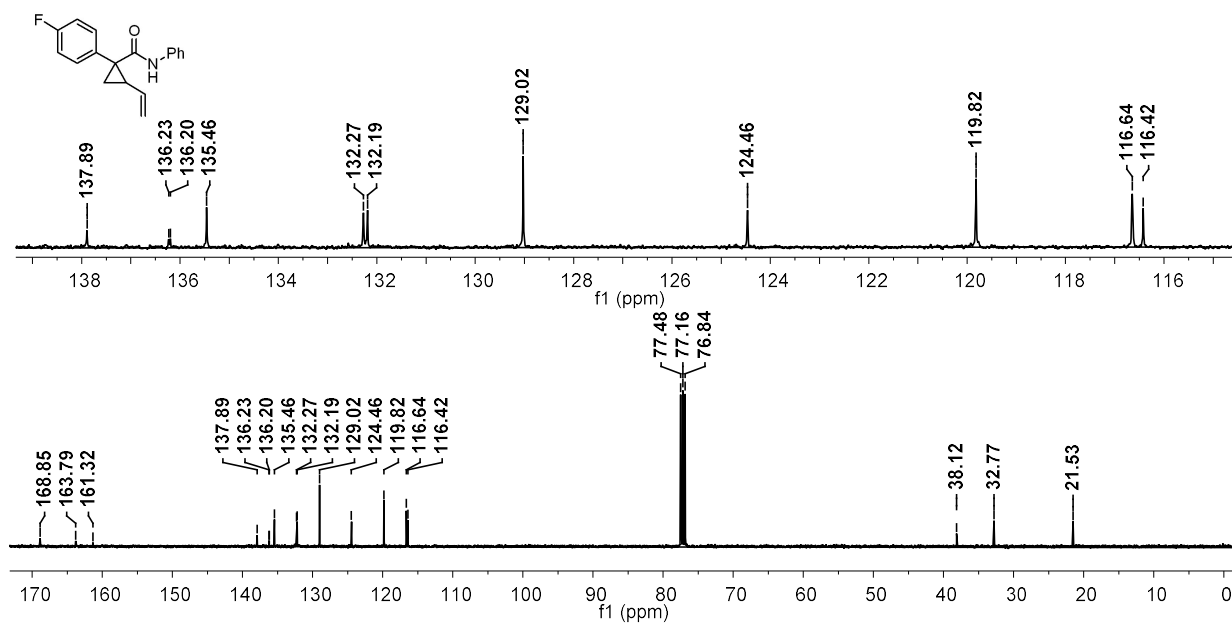

<sup>19</sup>F NMR spectra of **1t** (565 MHz, CDCl<sub>3</sub>)

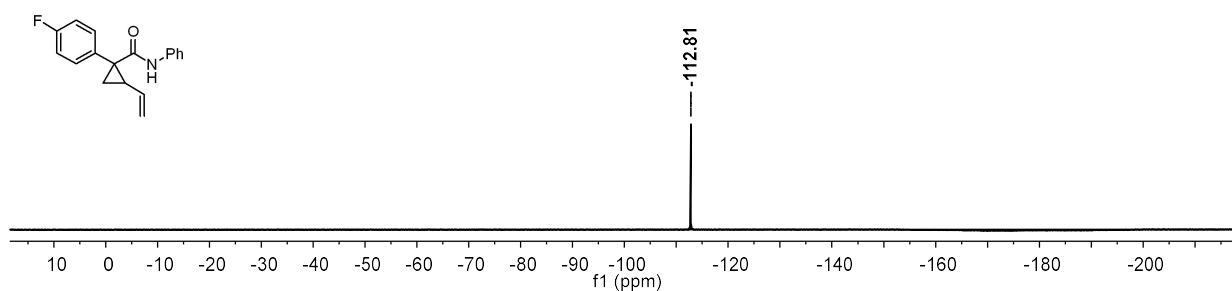

$^1\text{H}$  NMR spectra of **1u** (400 MHz,  $\text{CDCl}_3$ )

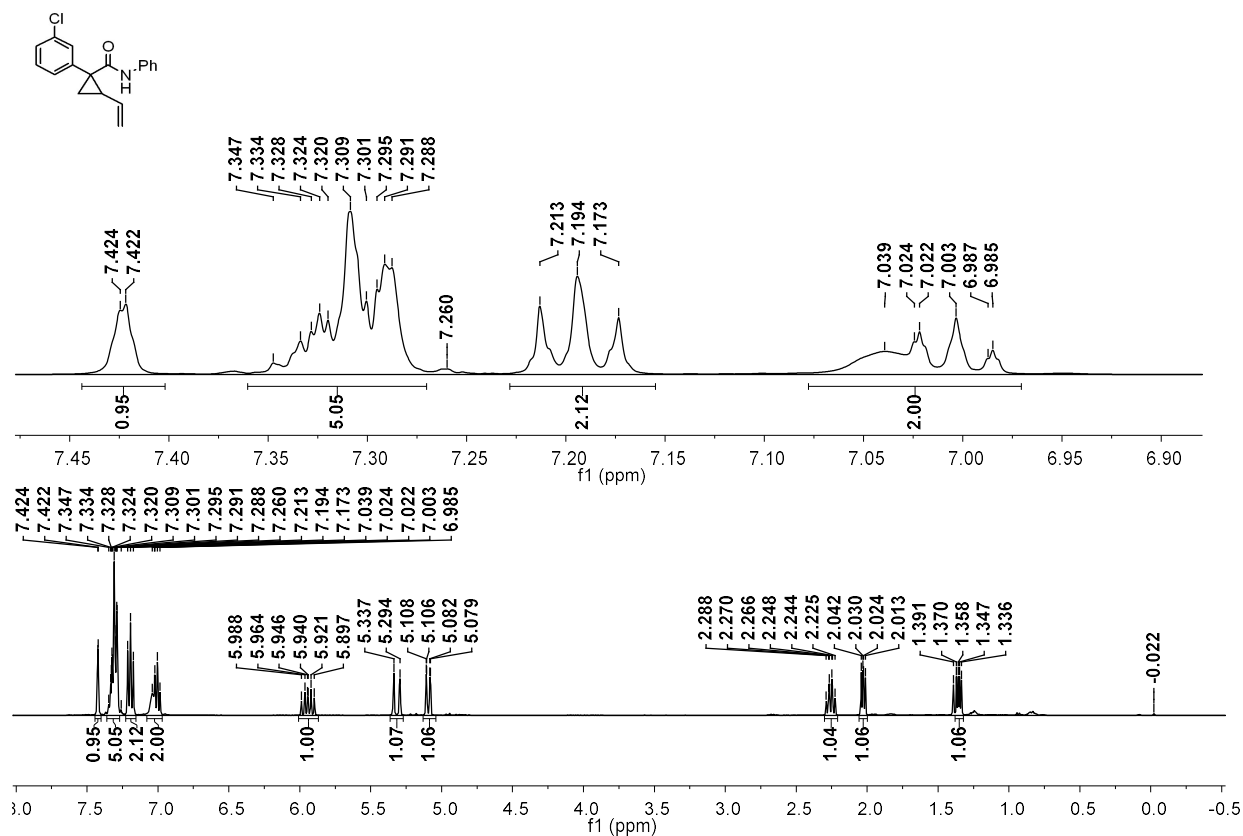

$^{13}\text{C}\{^1\text{H}\}$  NMR spectra of **1u** (101 MHz,  $\text{CDCl}_3$ )

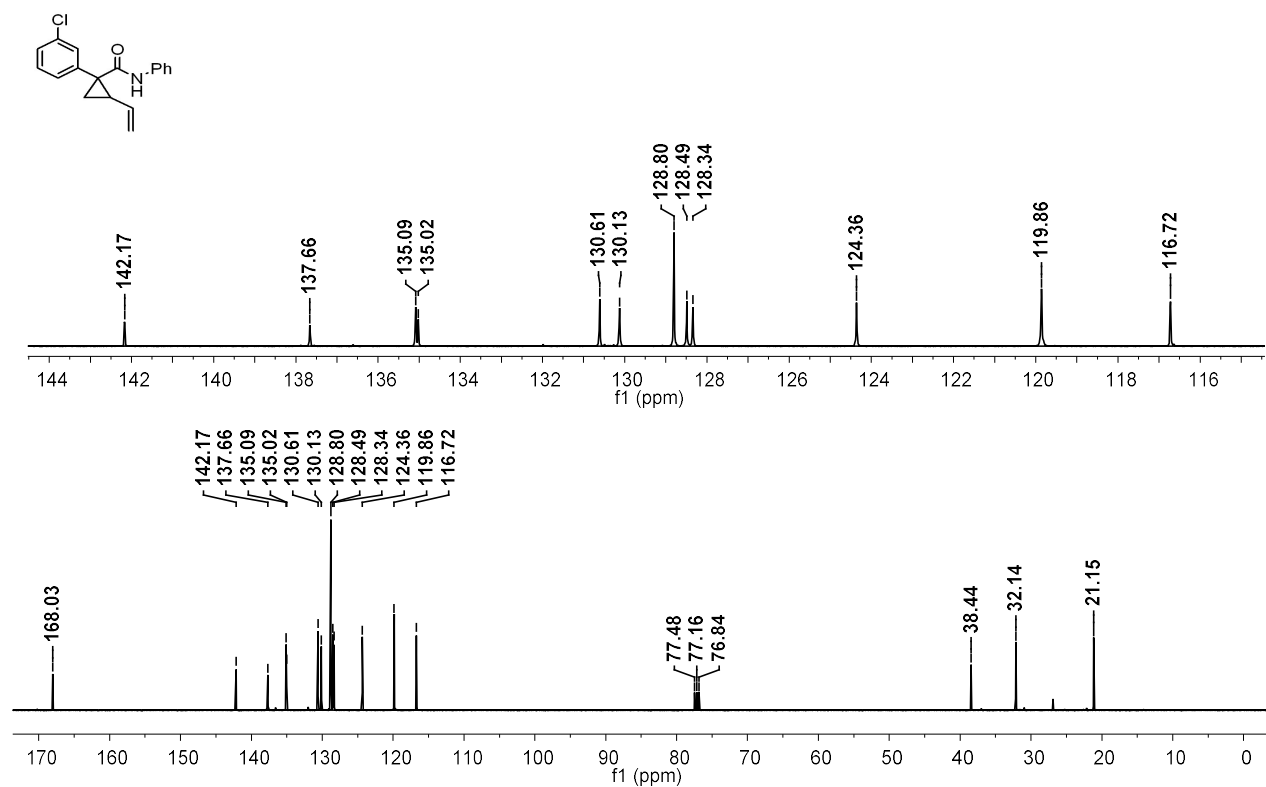

$^1\text{H}$  NMR spectra of **1v** (600 MHz,  $\text{CDCl}_3$ )

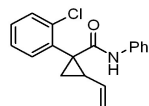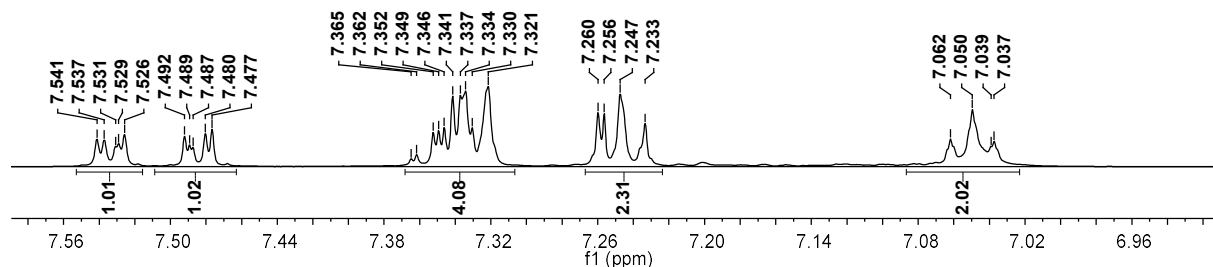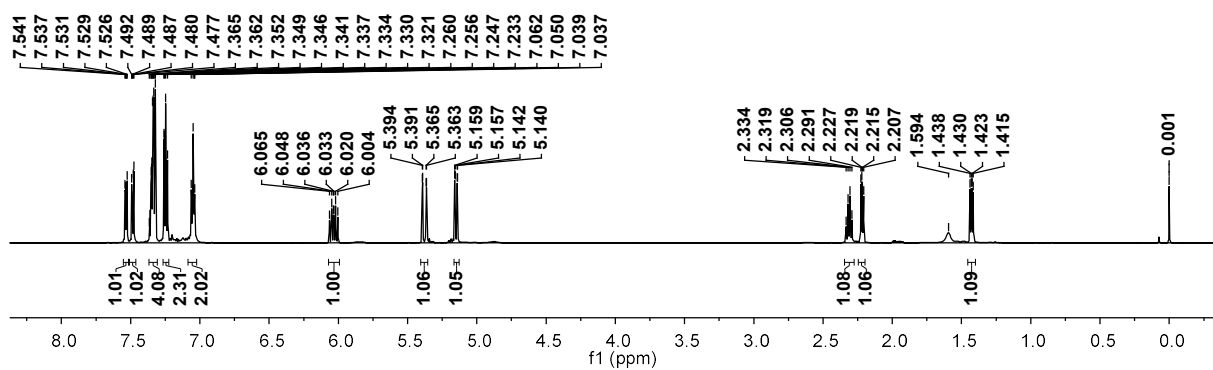

$^{13}\text{C}\{^1\text{H}\}$  NMR spectra of **1v** (151 MHz,  $\text{CDCl}_3$ )

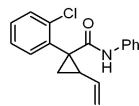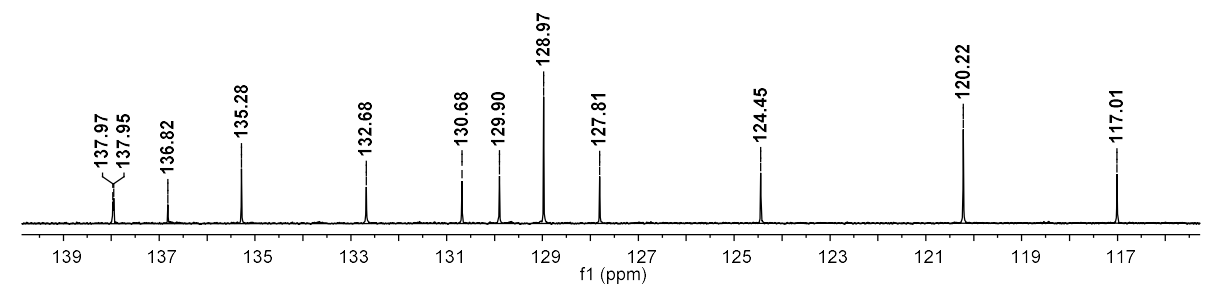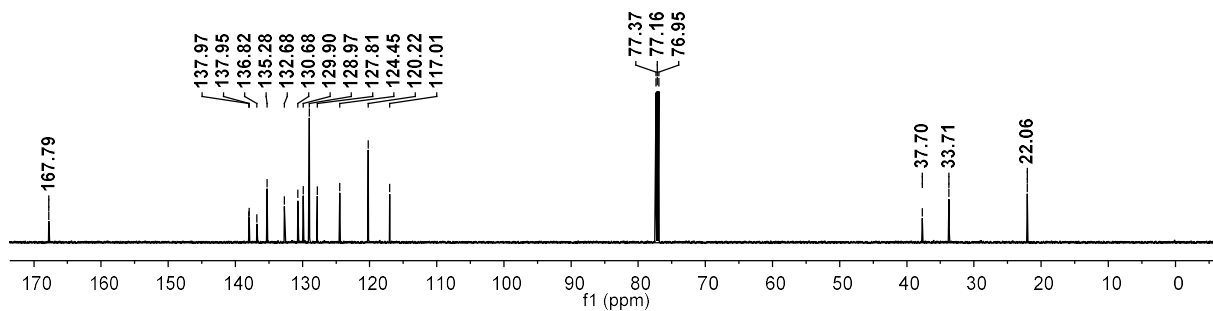



$^1\text{H}$  NMR spectra of **1w** (400 MHz,  $\text{CDCl}_3$ )

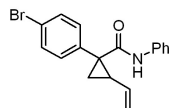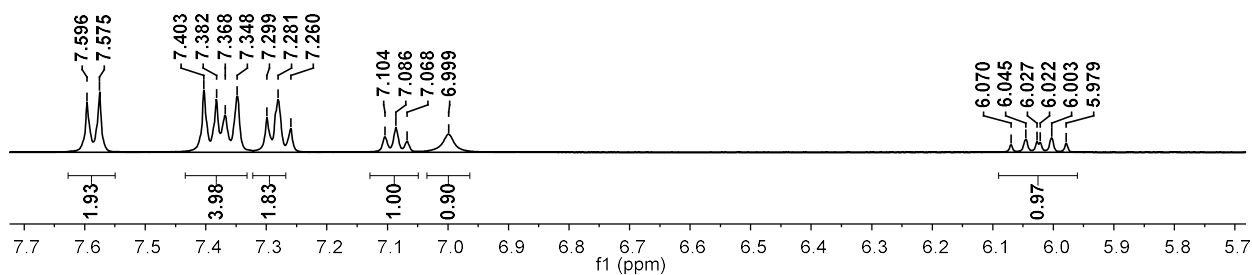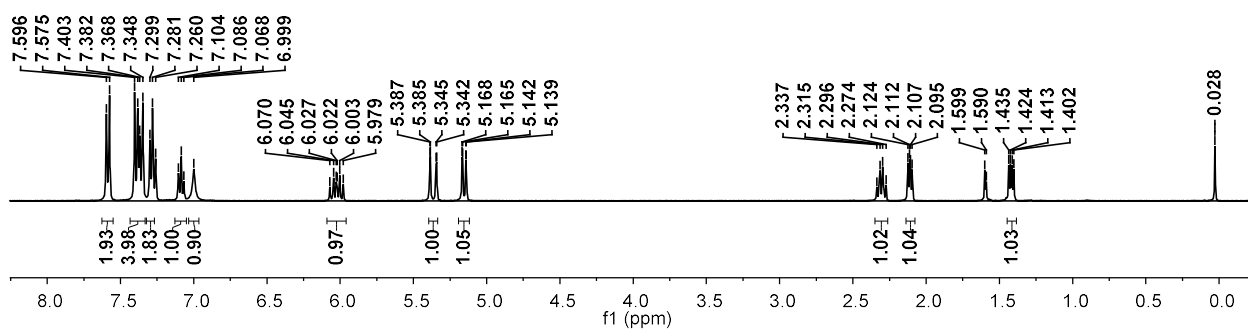

$^{13}\text{C}\{^1\text{H}\}$  NMR spectra of **1w** (101 MHz,  $\text{CDCl}_3$ )

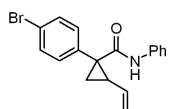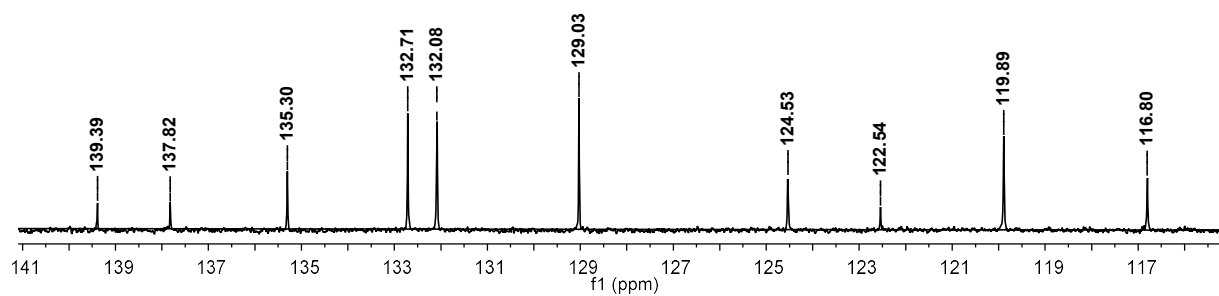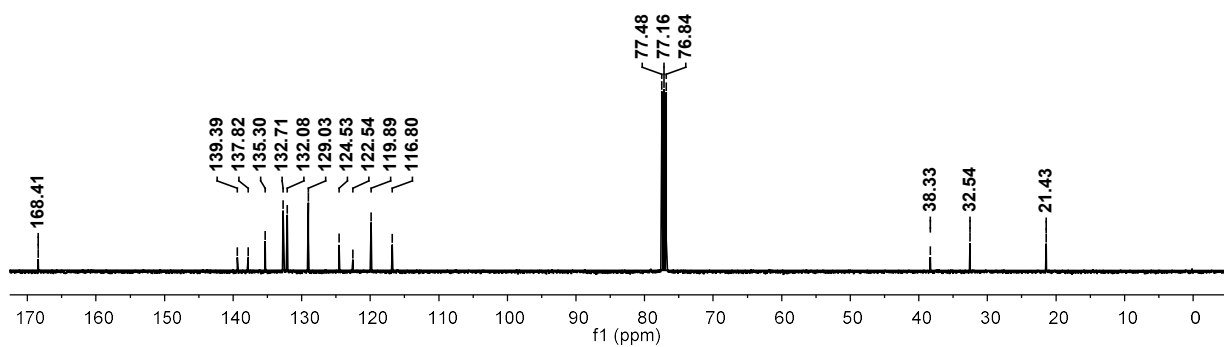

$^1\text{H}$  NMR spectra of **1x** (400 MHz,  $\text{CDCl}_3$ )

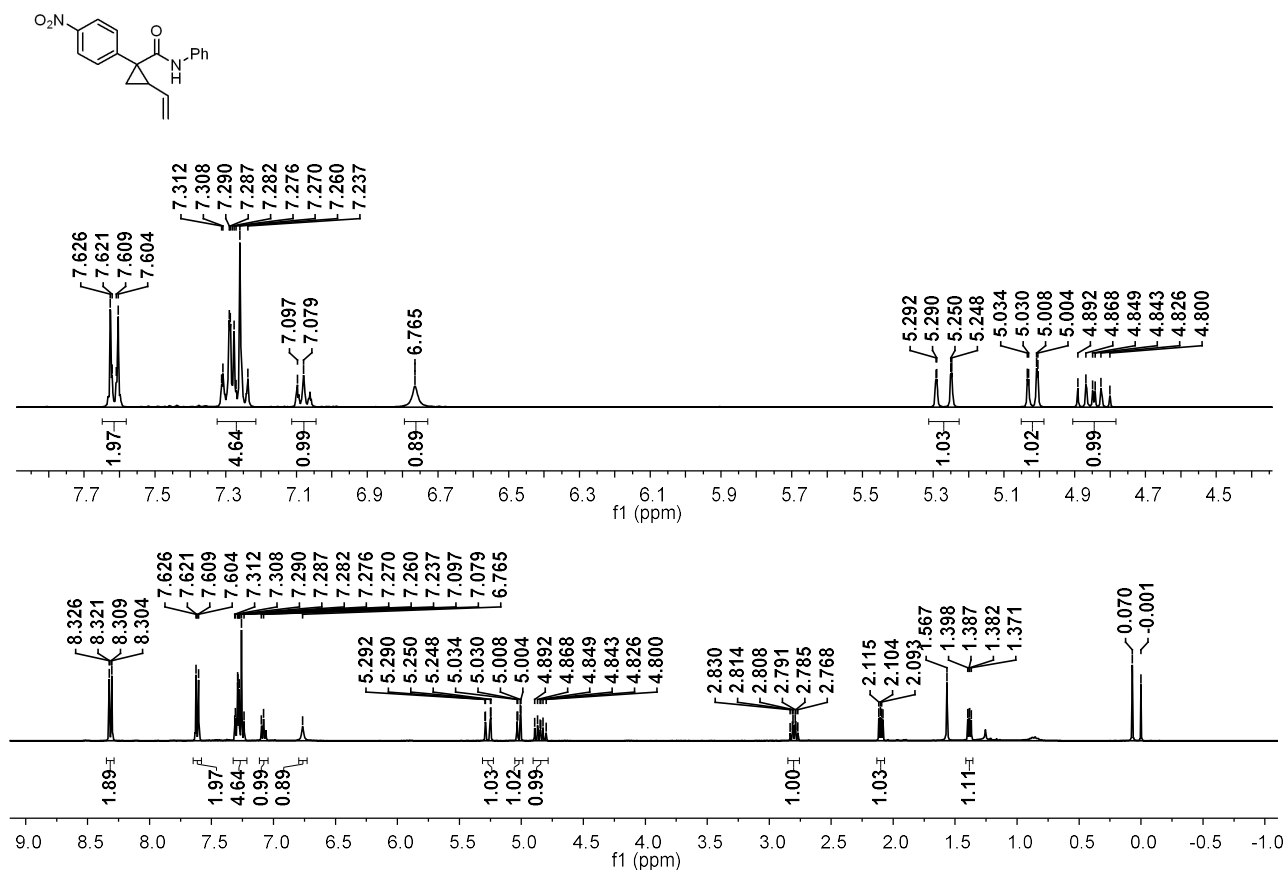

$^{13}\text{C}\{^1\text{H}\}$  NMR spectra of **1x** (101 MHz,  $\text{CDCl}_3$ )

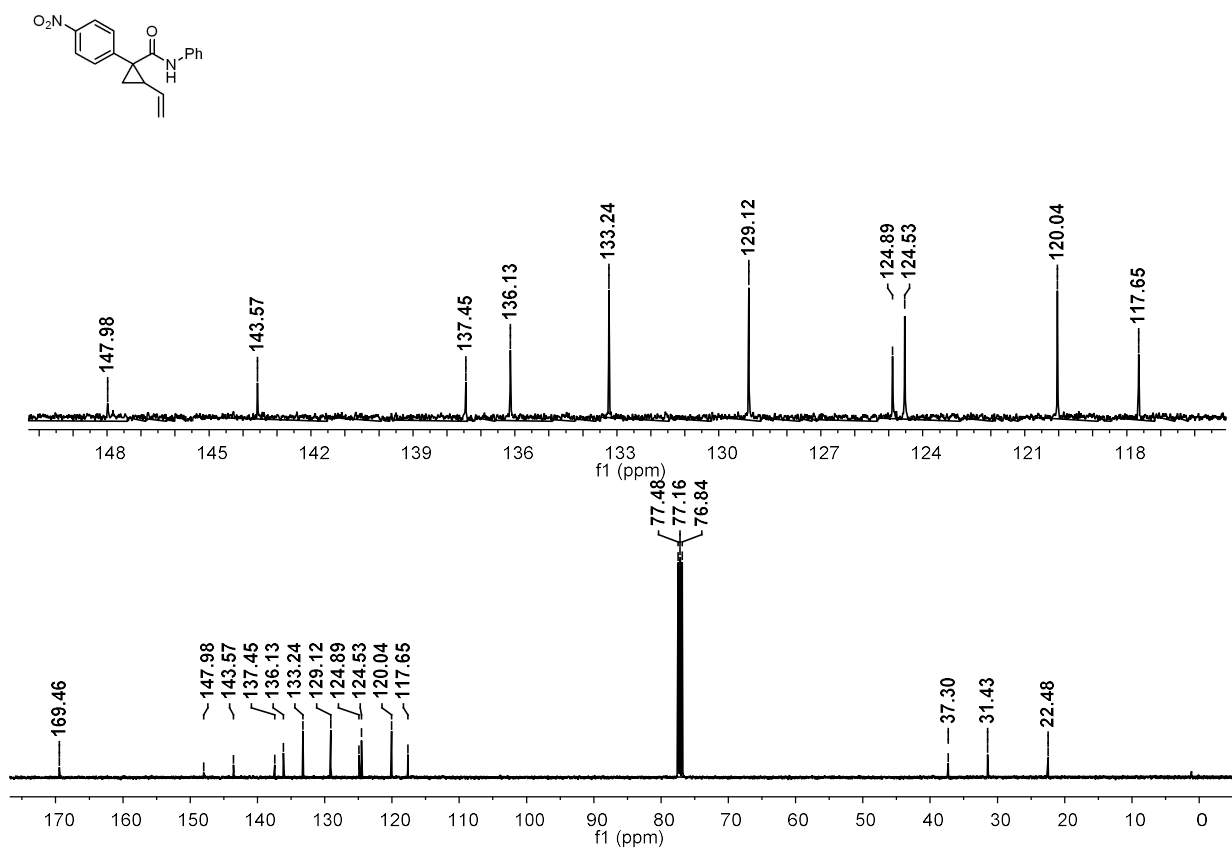

$^1\text{H}$  NMR spectra of **1y** (600 MHz,  $\text{CDCl}_3$ )

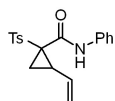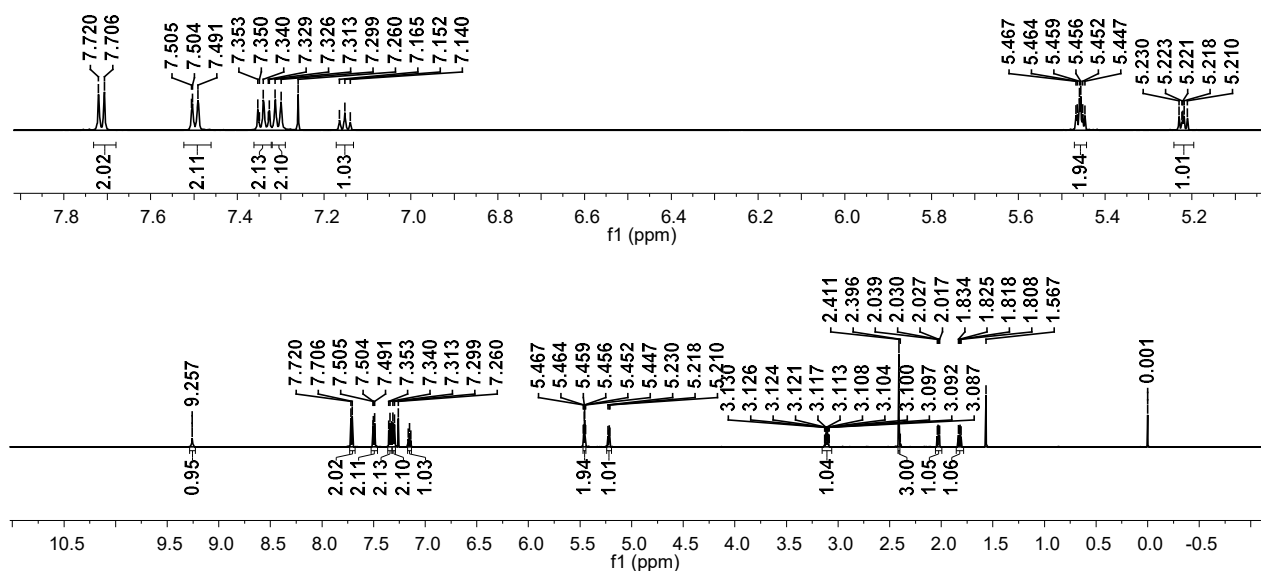

$^{13}\text{C}\{^1\text{H}\}$  NMR spectra of **1y** (101 MHz,  $\text{CDCl}_3$ )

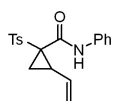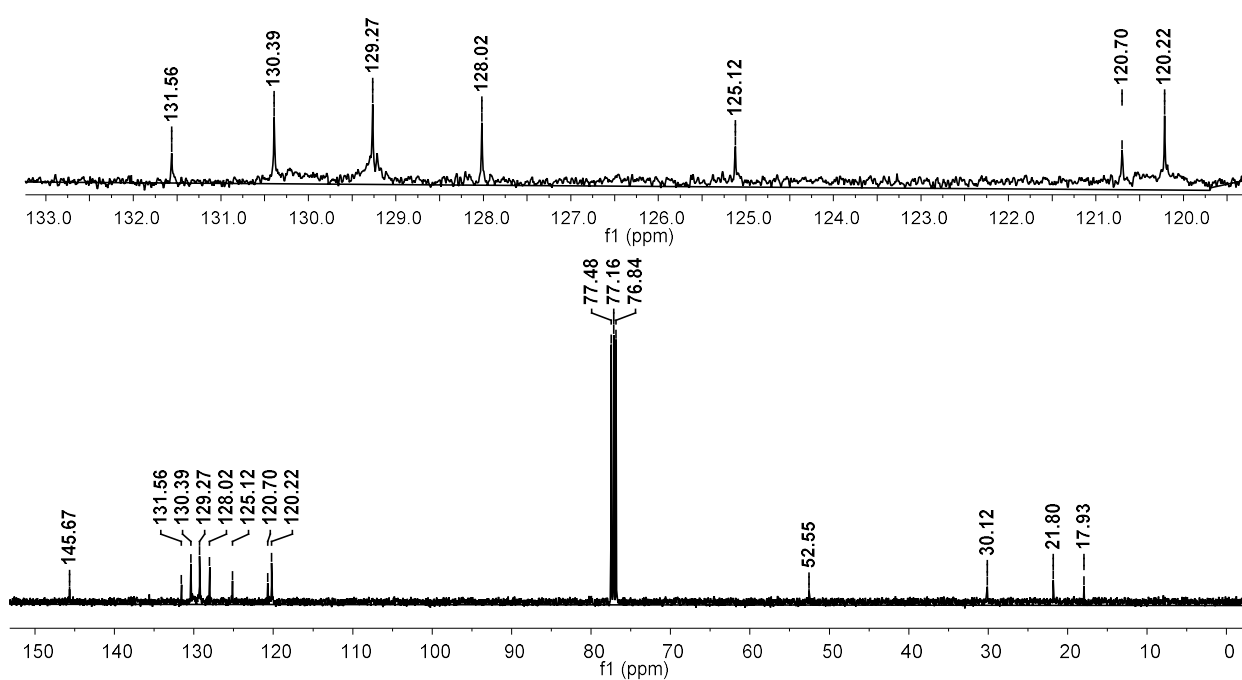

$^1\text{H}$  NMR spectra of **1z** (400 MHz,  $\text{CDCl}_3$ )

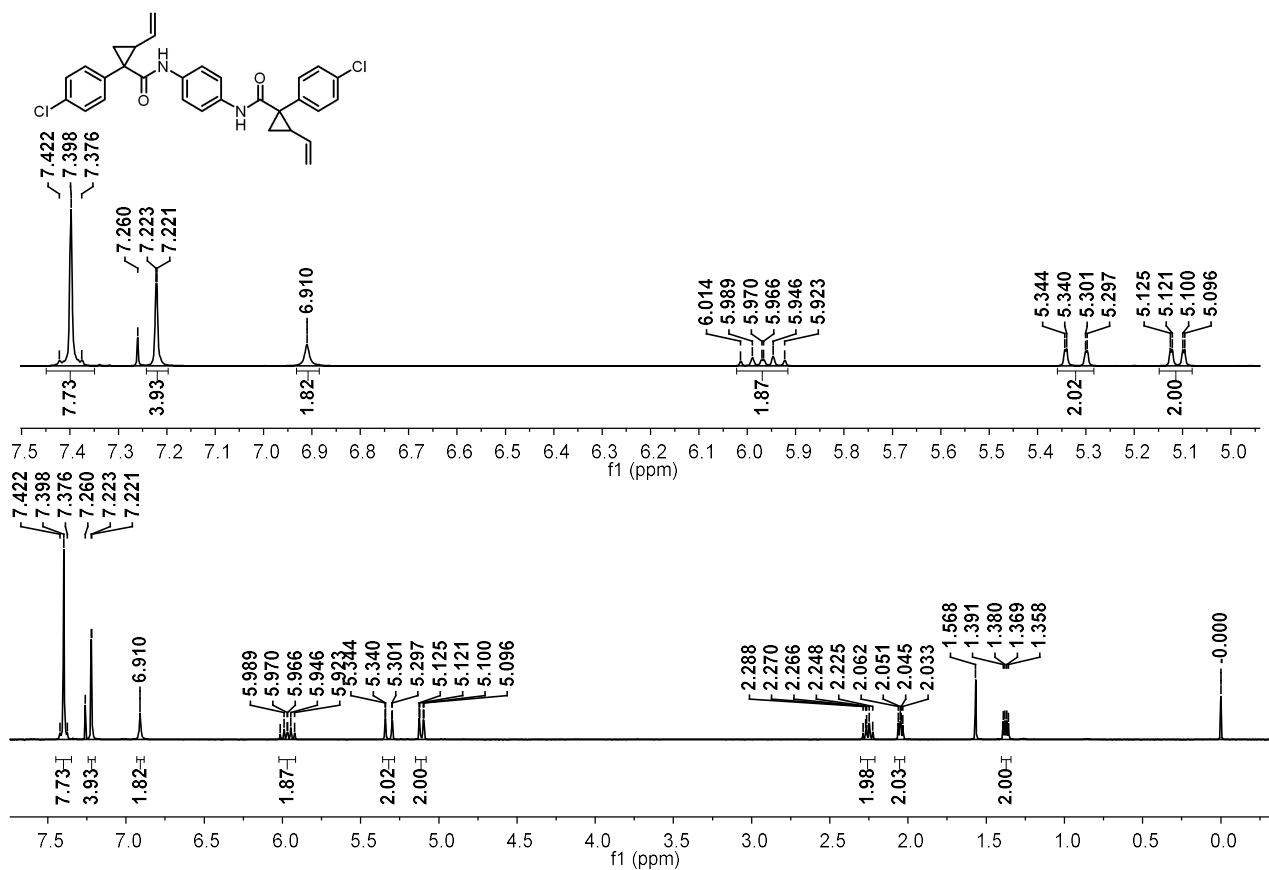

$^{13}\text{C}\{^1\text{H}\}$  NMR spectra of **1z** (101 MHz,  $\text{CDCl}_3$ )

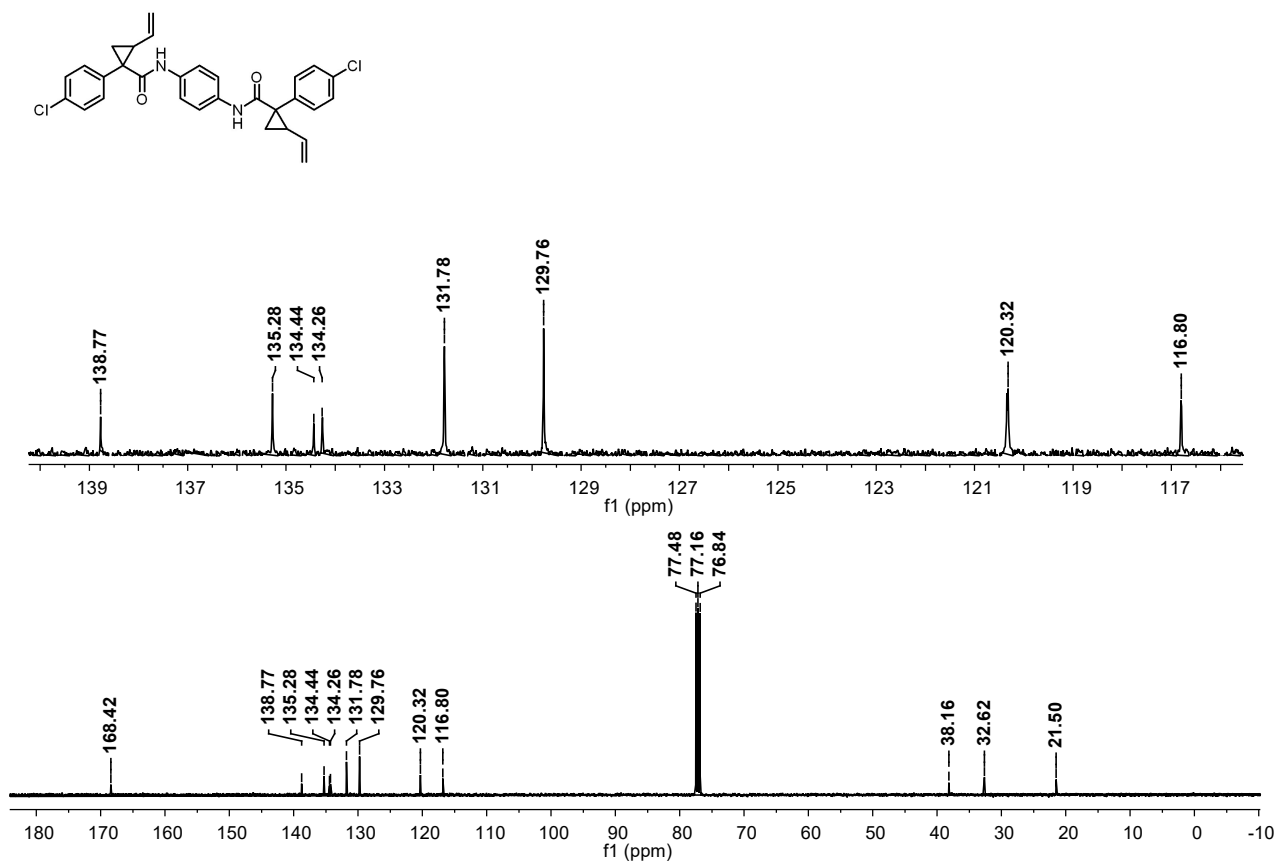

<sup>1</sup>H NMR spectra of **1aa** (600 MHz, CDCl<sub>3</sub>)

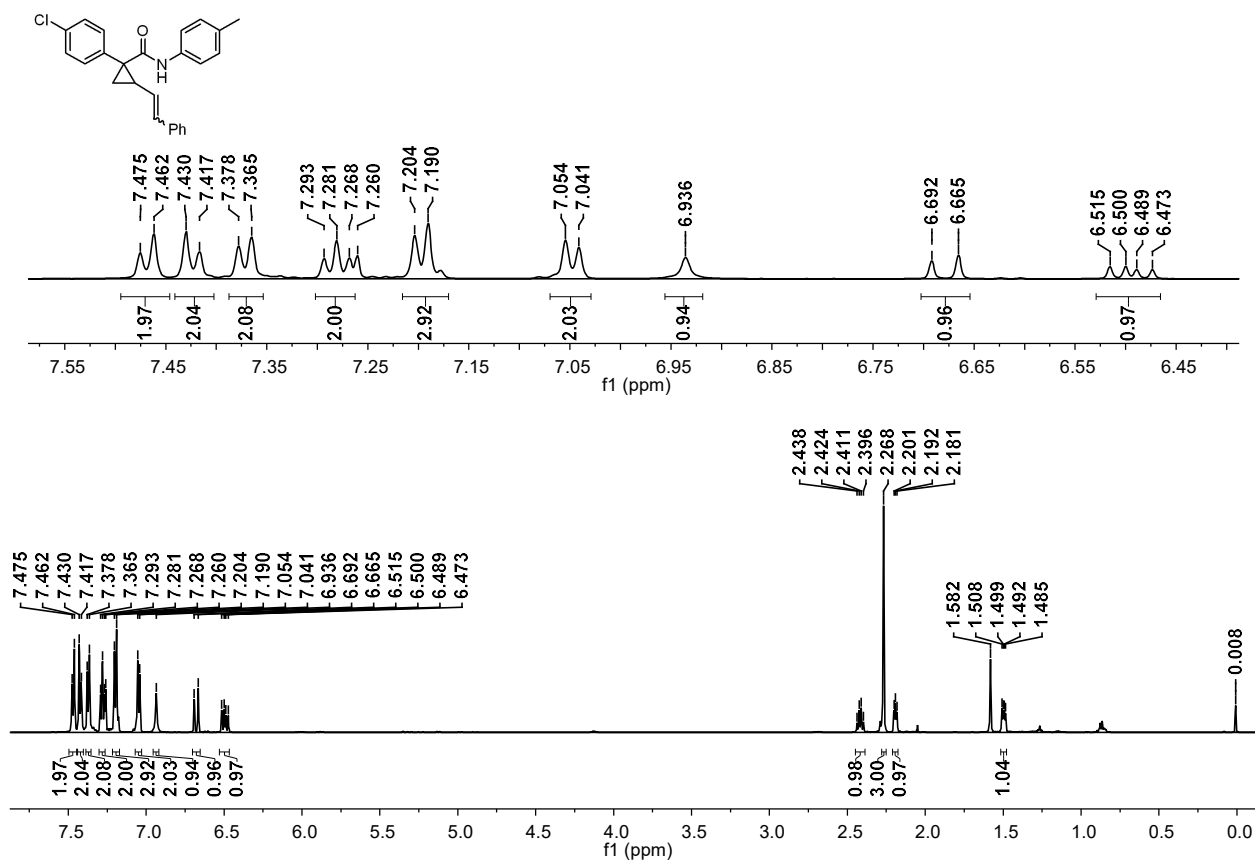

<sup>13</sup>C {<sup>1</sup>H} NMR spectra of **1aa** (151 MHz, CDCl<sub>3</sub>)

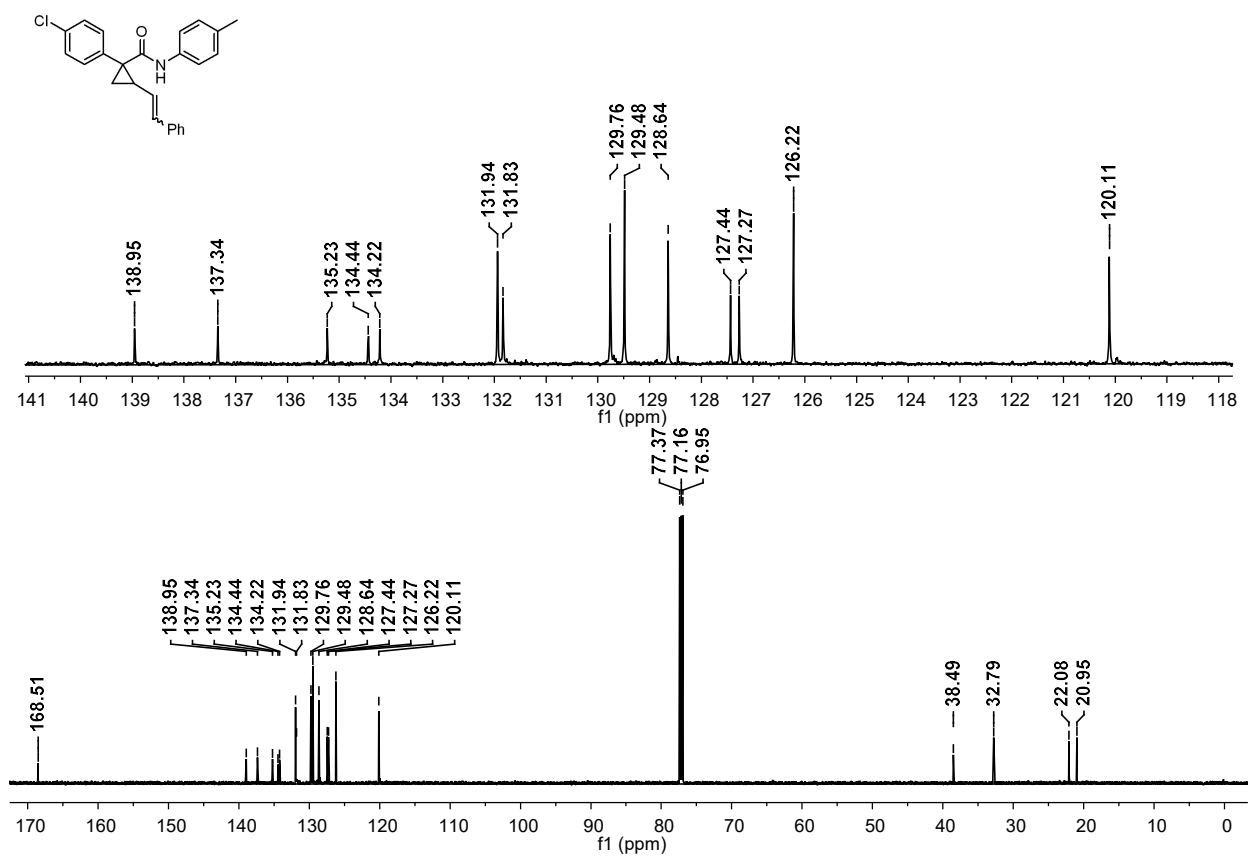

$^1\text{H}$  NMR spectra of **1ab** (600 MHz,  $\text{CDCl}_3$ )

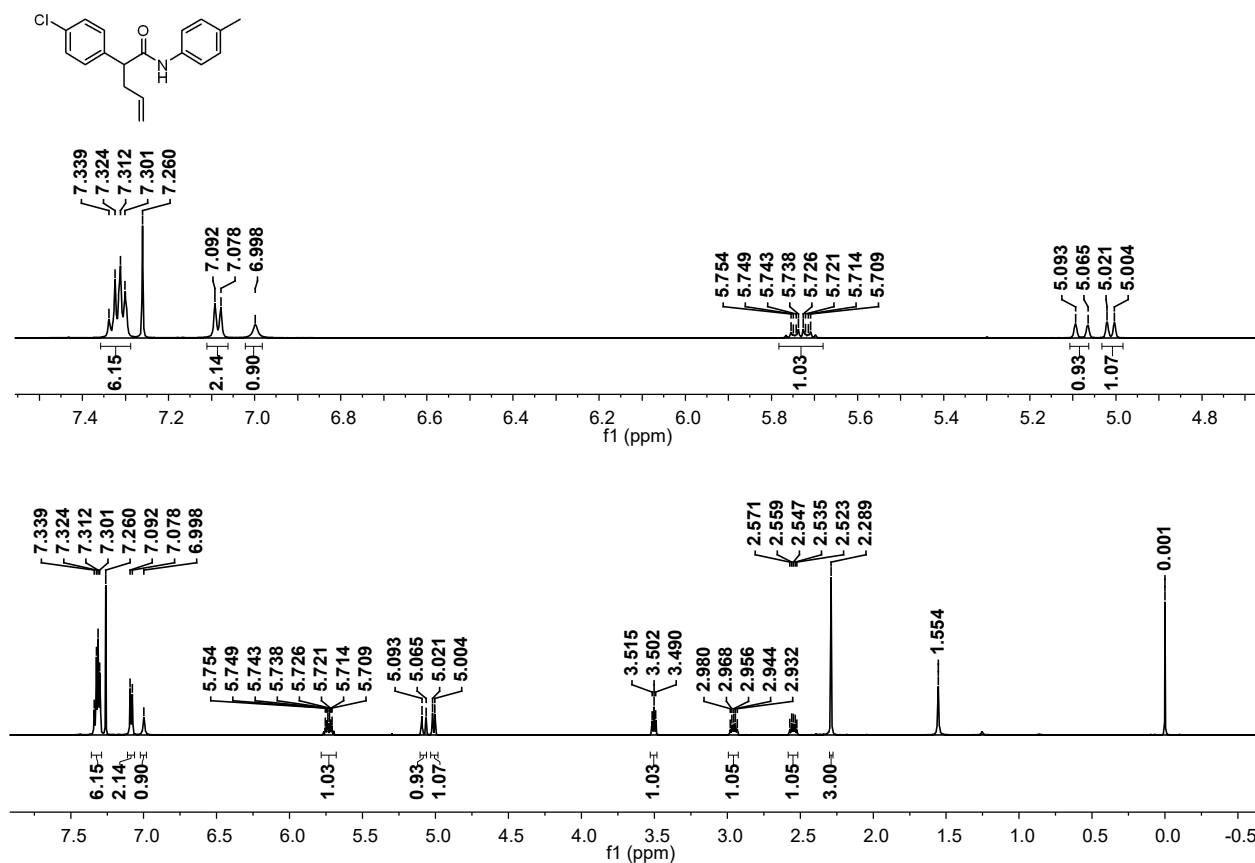

$^{13}\text{C}\{^1\text{H}\}$  NMR spectra of **1ab** (151 MHz,  $\text{CDCl}_3$ )

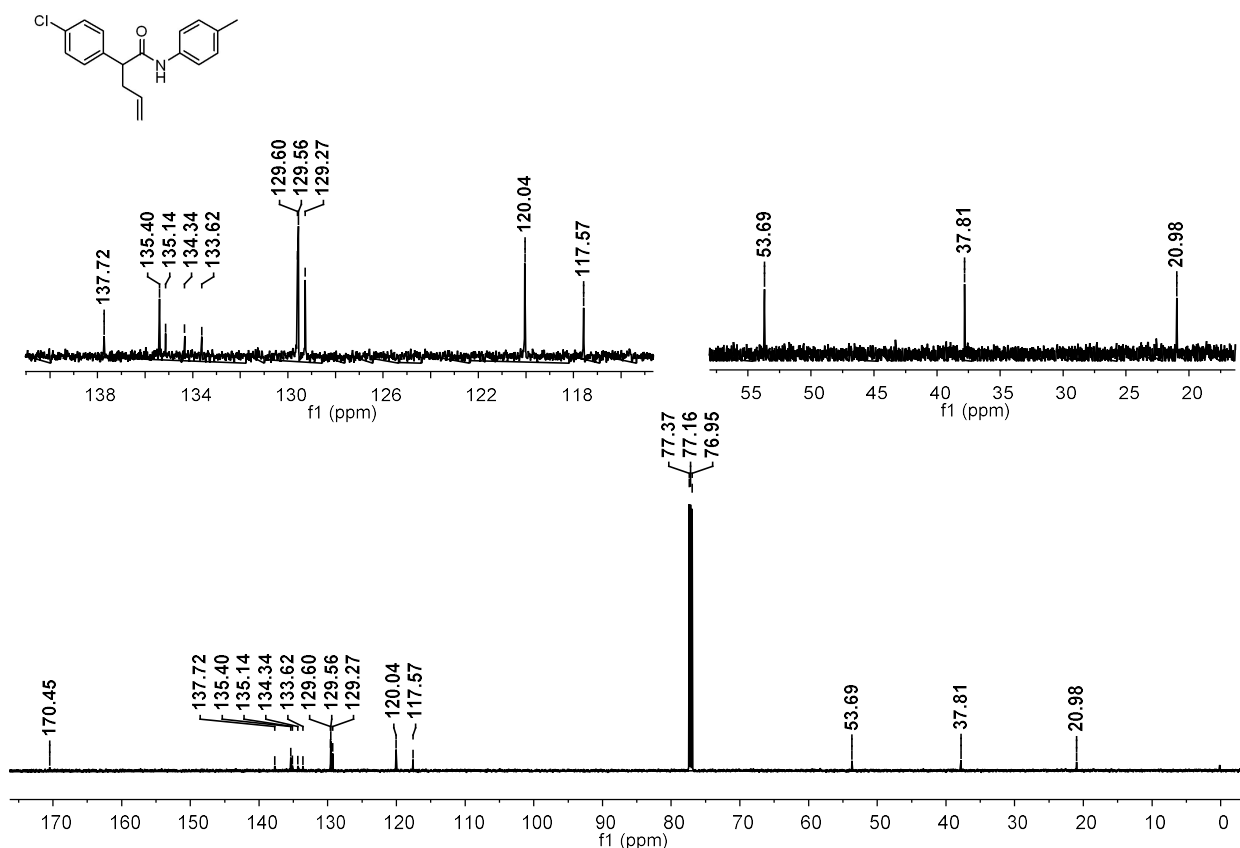

$^1\text{H}$  NMR spectra of **2a** (400 MHz,  $\text{CDCl}_3$ )

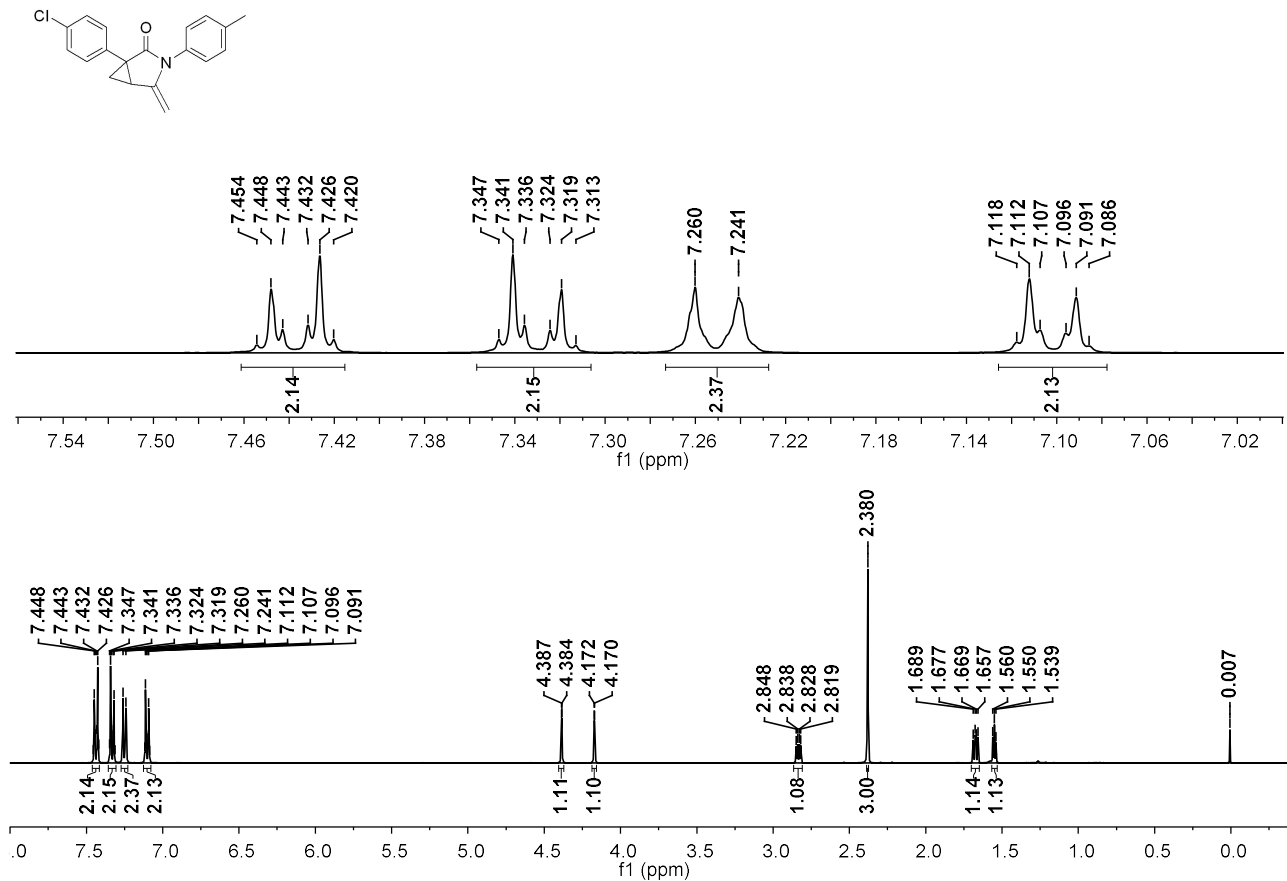

$^{13}\text{C}\{^1\text{H}\}$  NMR spectra of **2a** (101 MHz,  $\text{CDCl}_3$ )

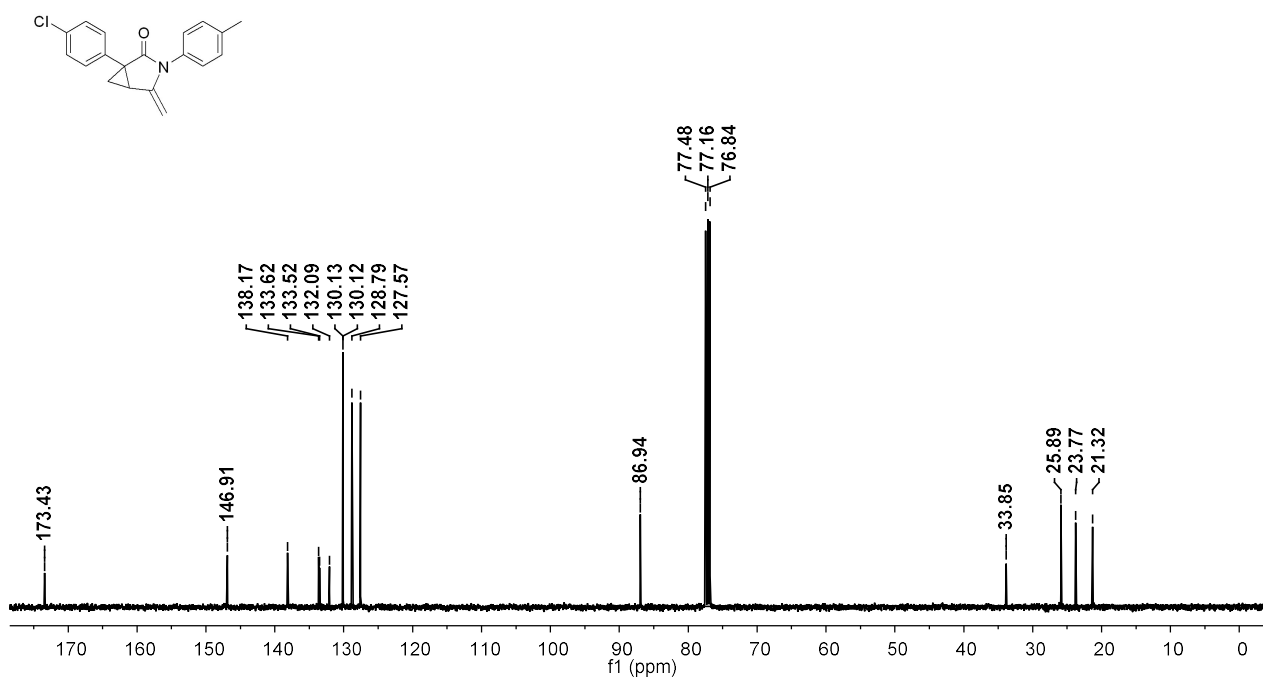

$^1\text{H}$  NMR spectra of **2b** (600 MHz,  $\text{CDCl}_3$ )

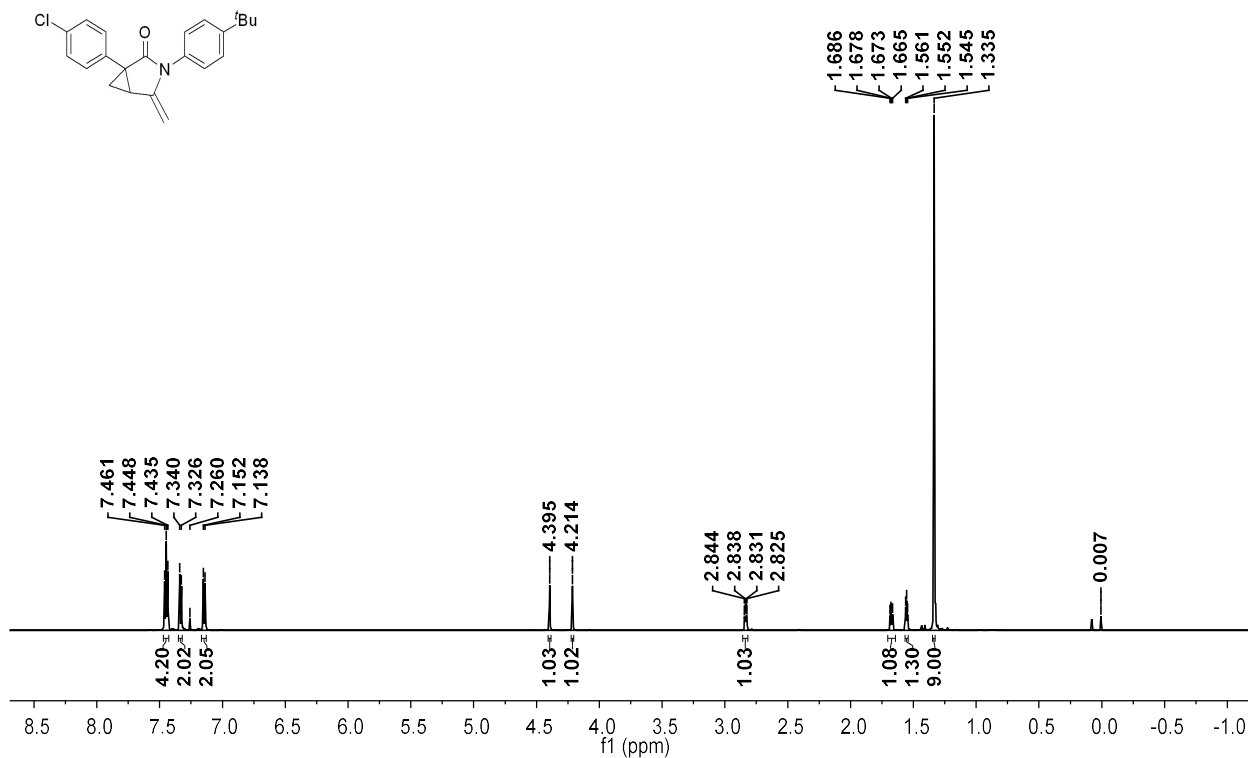

$^{13}\text{C}\{^1\text{H}\}$  NMR spectra of **2b** (151 MHz,  $\text{CDCl}_3$ )

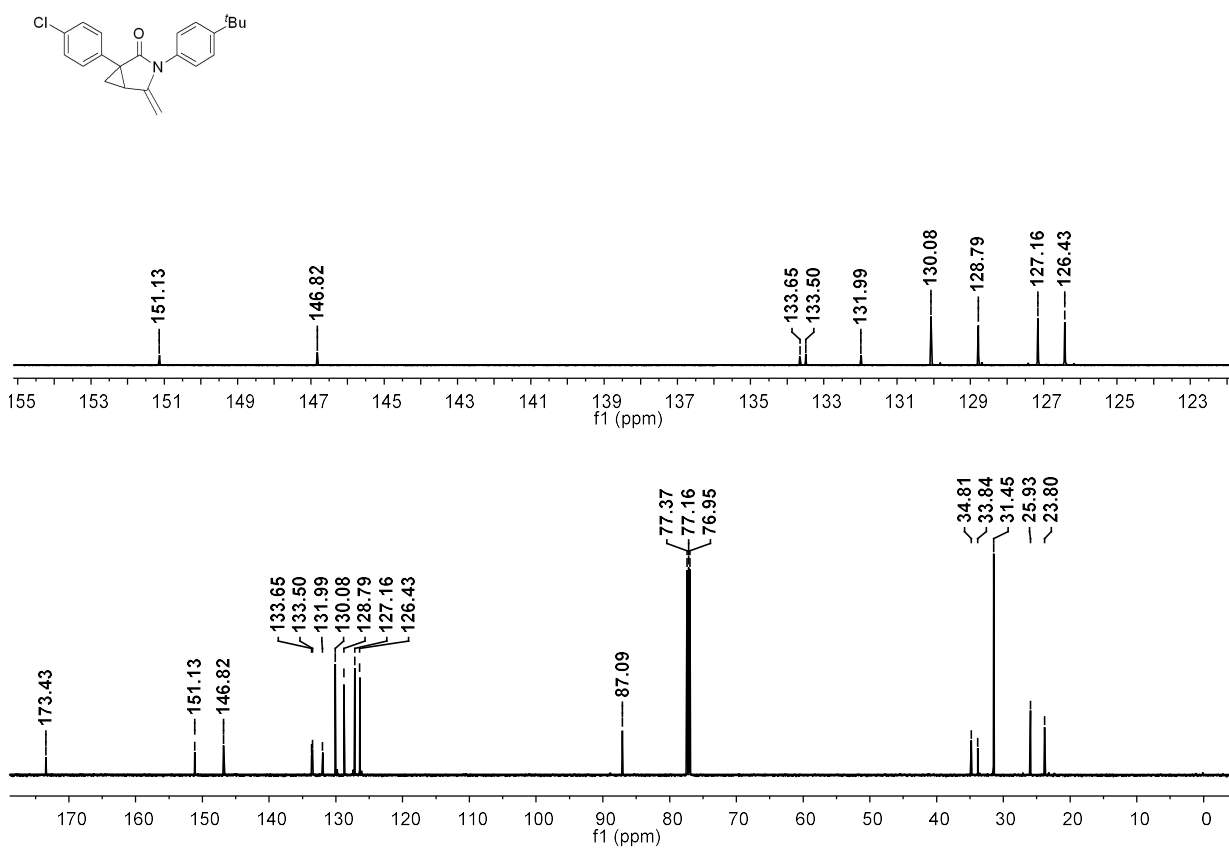



$^1\text{H}$  NMR spectra of **2c** (600 MHz,  $\text{CDCl}_3$ )

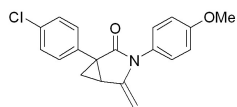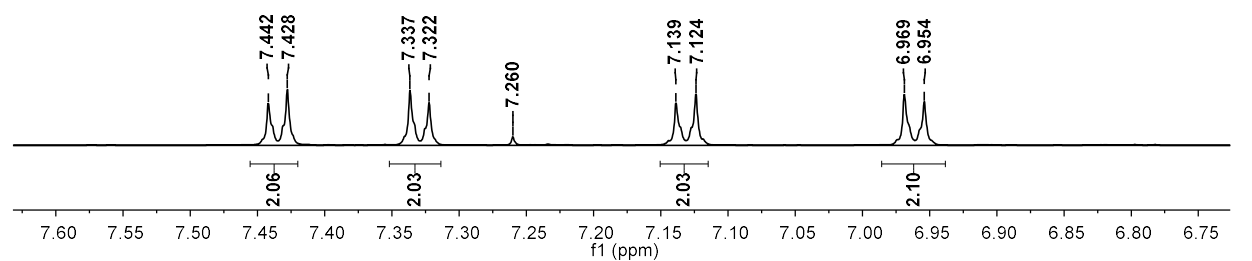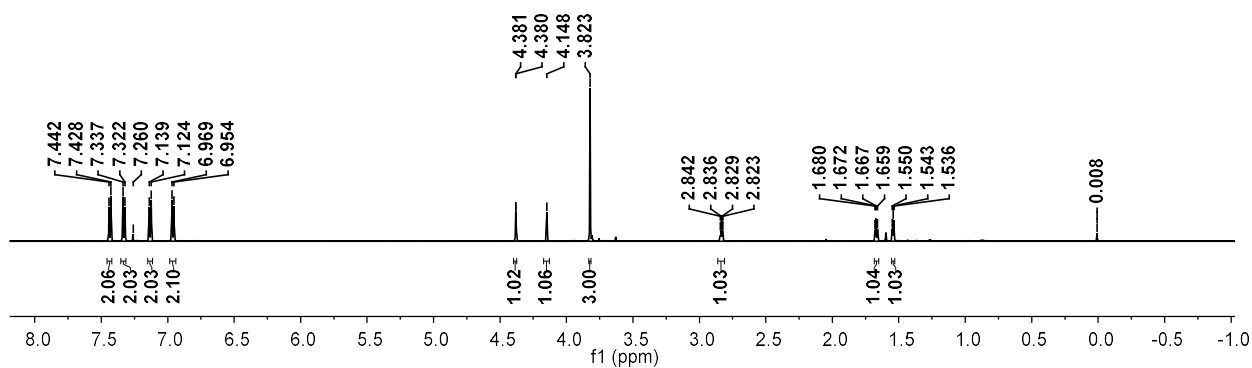

$^{13}\text{C}\{^1\text{H}\}$  NMR spectra of **2c** (151 MHz,  $\text{CDCl}_3$ )

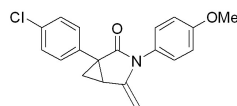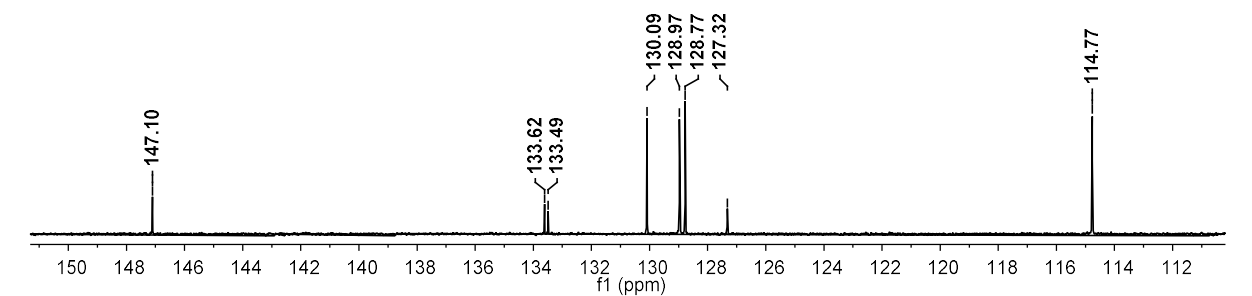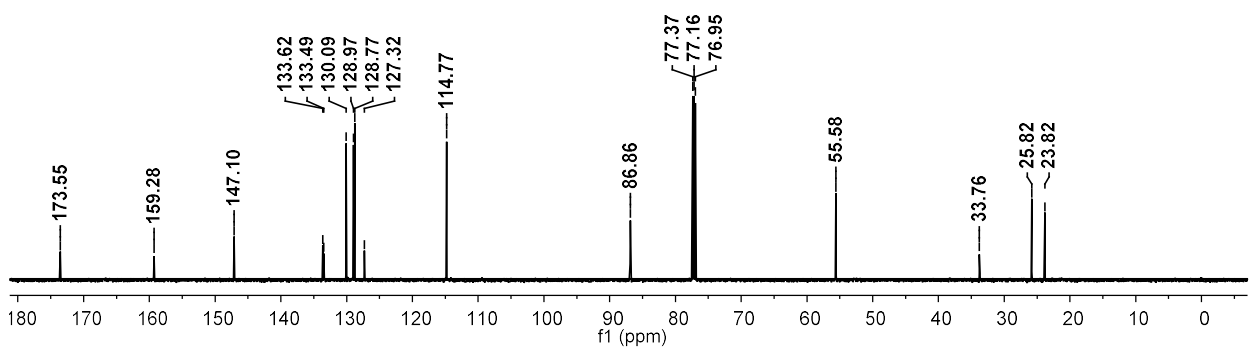

$^1\text{H}$  NMR spectra of **2d** (600 MHz,  $\text{CDCl}_3$ )

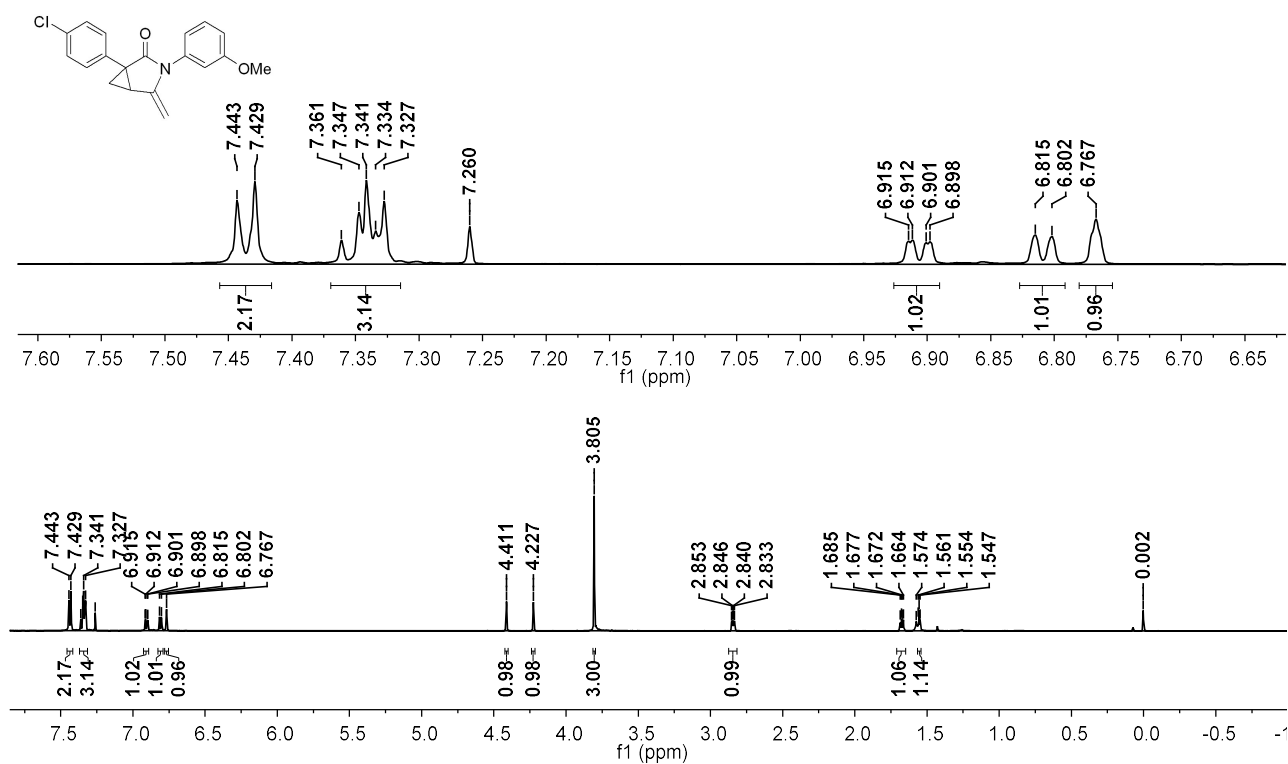

$^{13}\text{C}\{^1\text{H}\}$  NMR spectra of **2d** (151 MHz,  $\text{CDCl}_3$ )

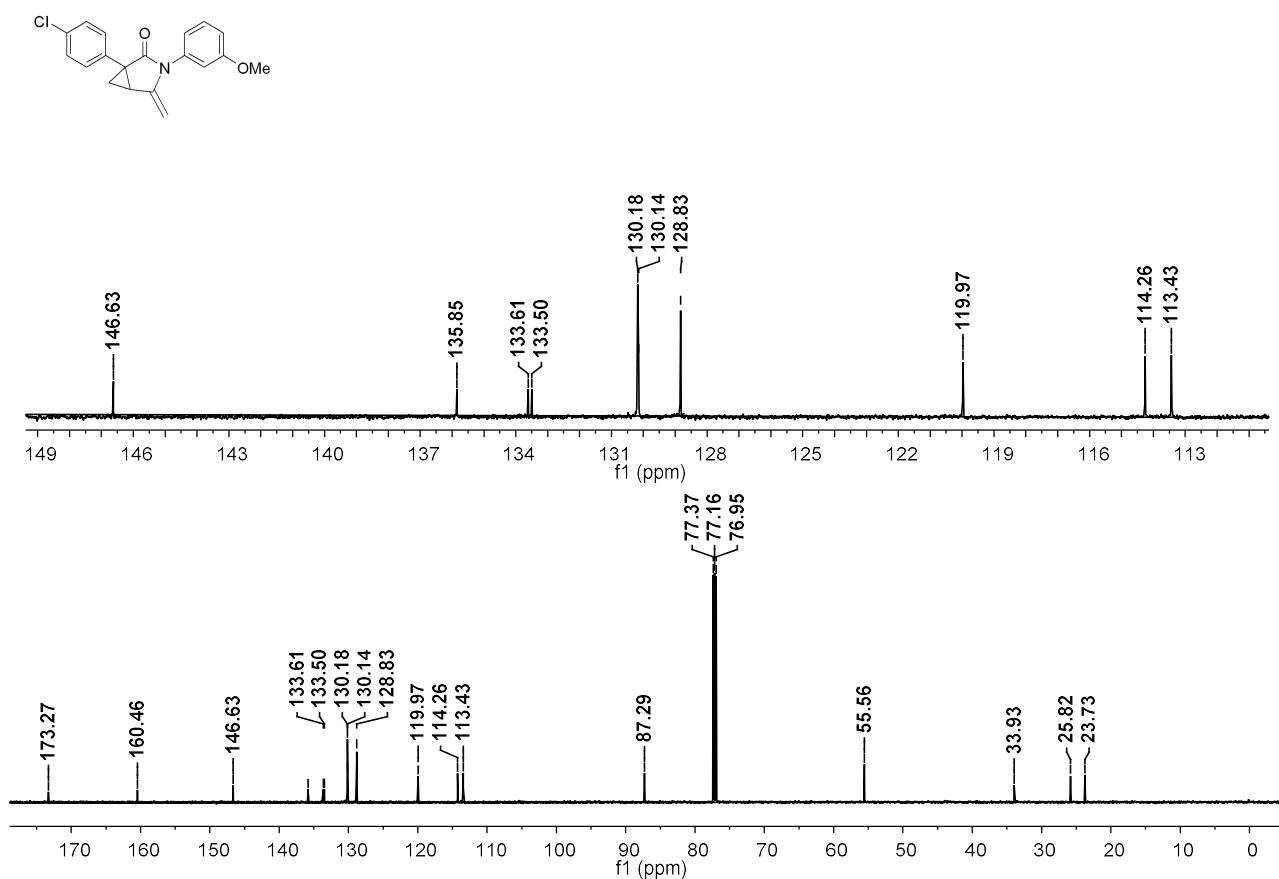

$^1\text{H}$  NMR spectra of **2e** (600 MHz,  $\text{CDCl}_3$ )

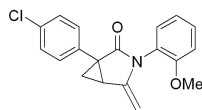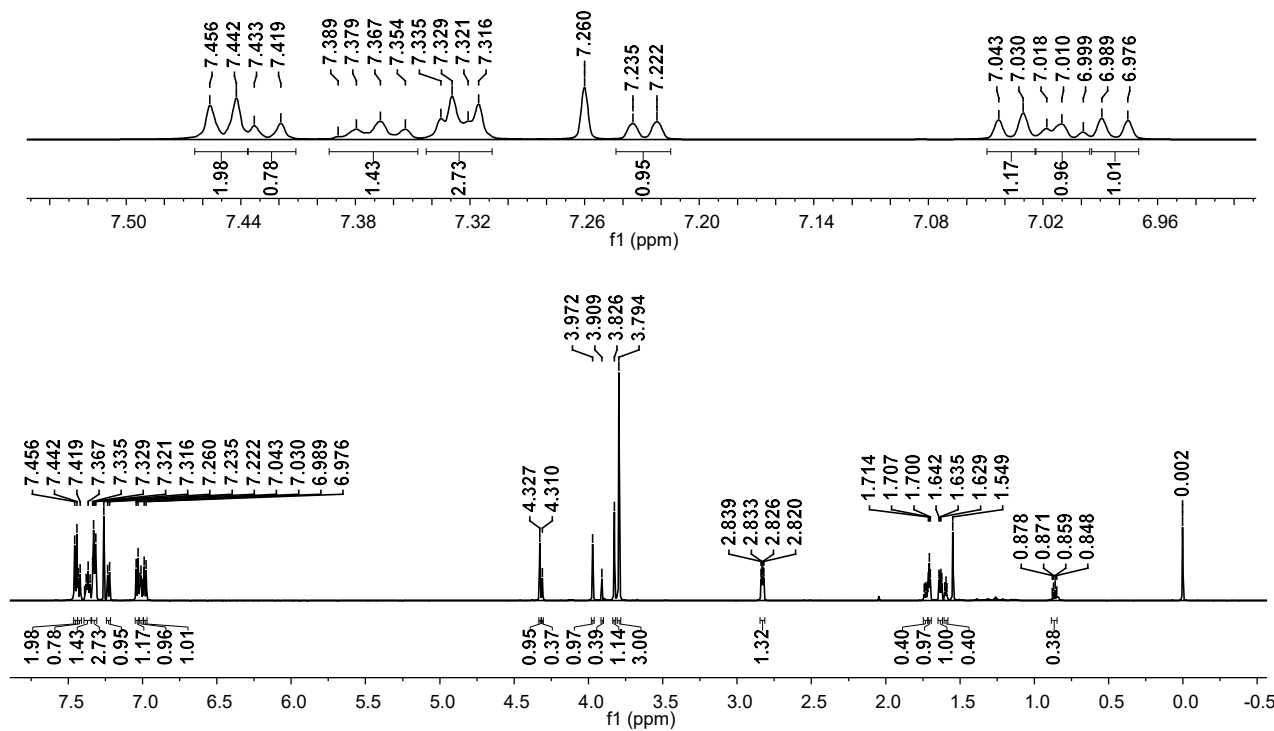

<sup>13</sup>C{<sup>1</sup>H} NMR spectra of **2e** (101 MHz, CDCl<sub>3</sub>)

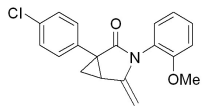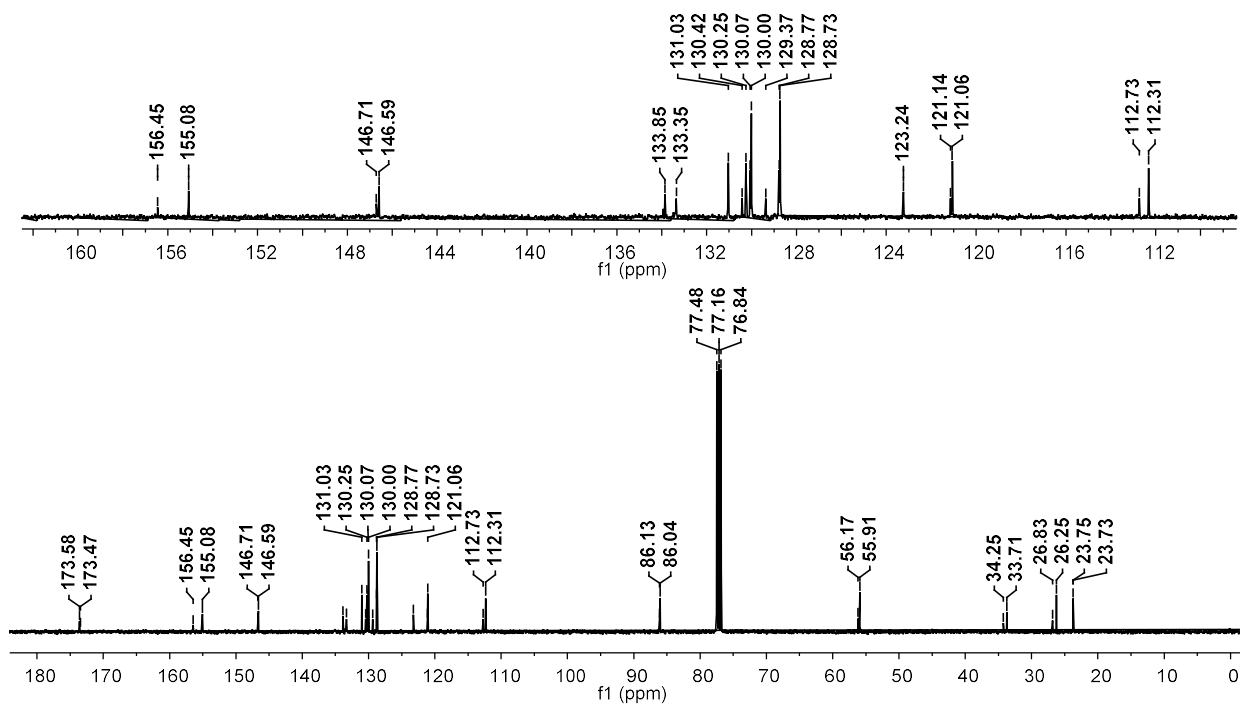

<sup>1</sup>H NMR spectra of **2f** (600 MHz, DMSO)

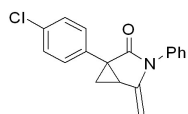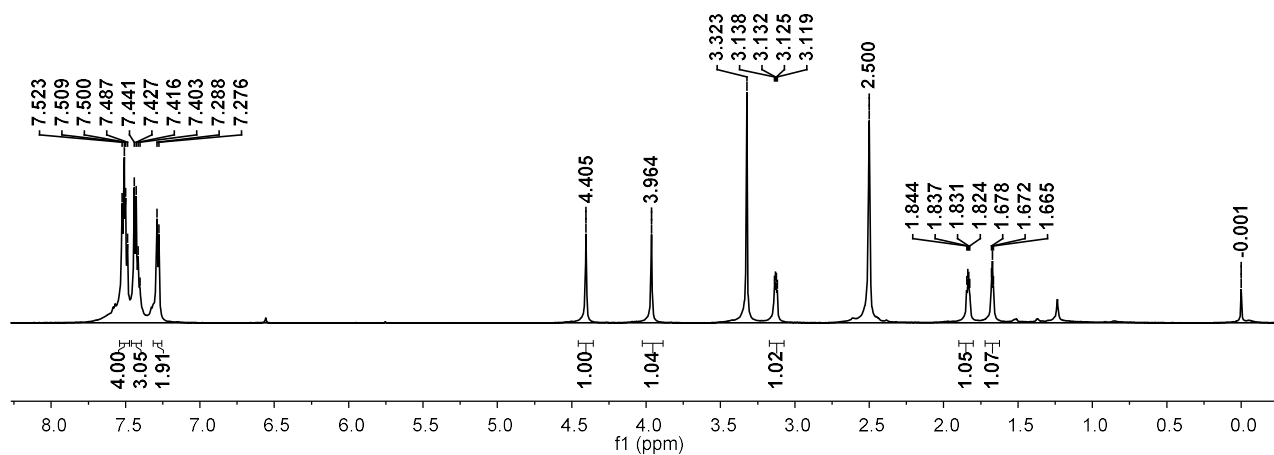

$^{13}\text{C}\{^1\text{H}\}$  NMR spectra of **2f** (151 MHz, DMSO)

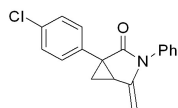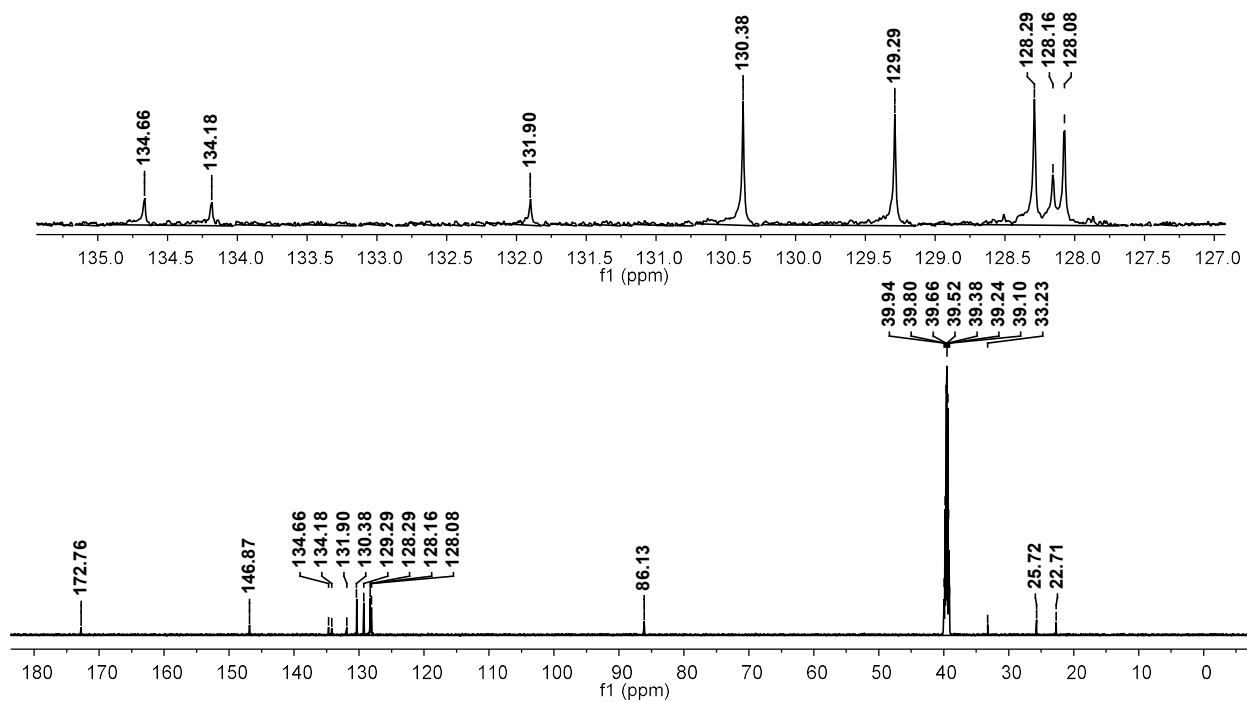

$^1\text{H}$  NMR spectra of **2g** (400 MHz,  $\text{CDCl}_3$ )

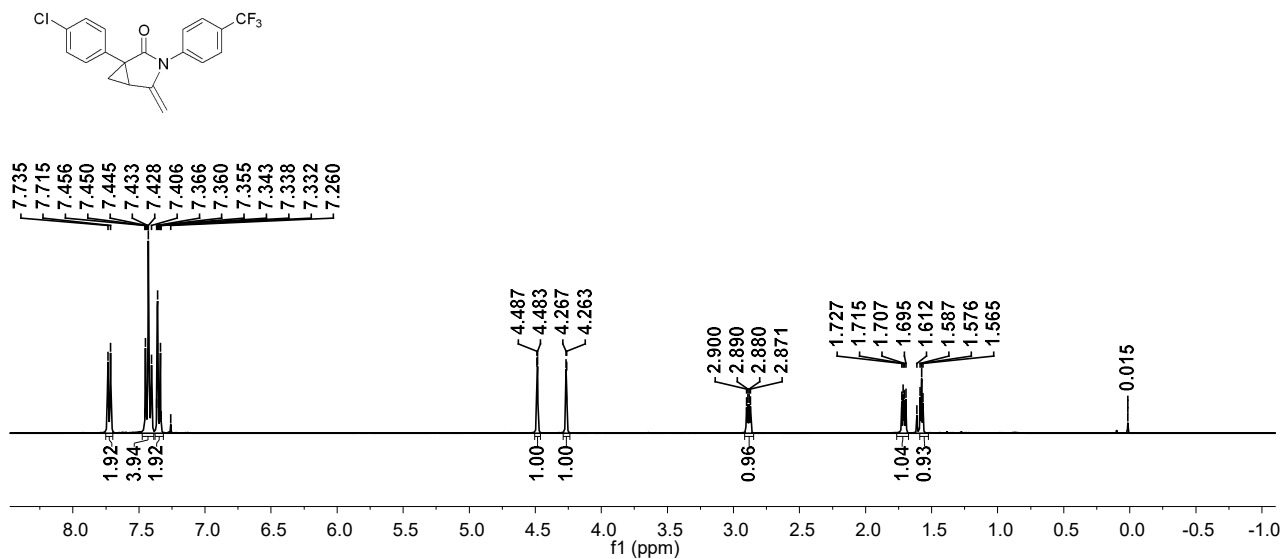

<sup>13</sup>C{<sup>1</sup>H} NMR spectra of **2g** (101 MHz, CDCl<sub>3</sub>)

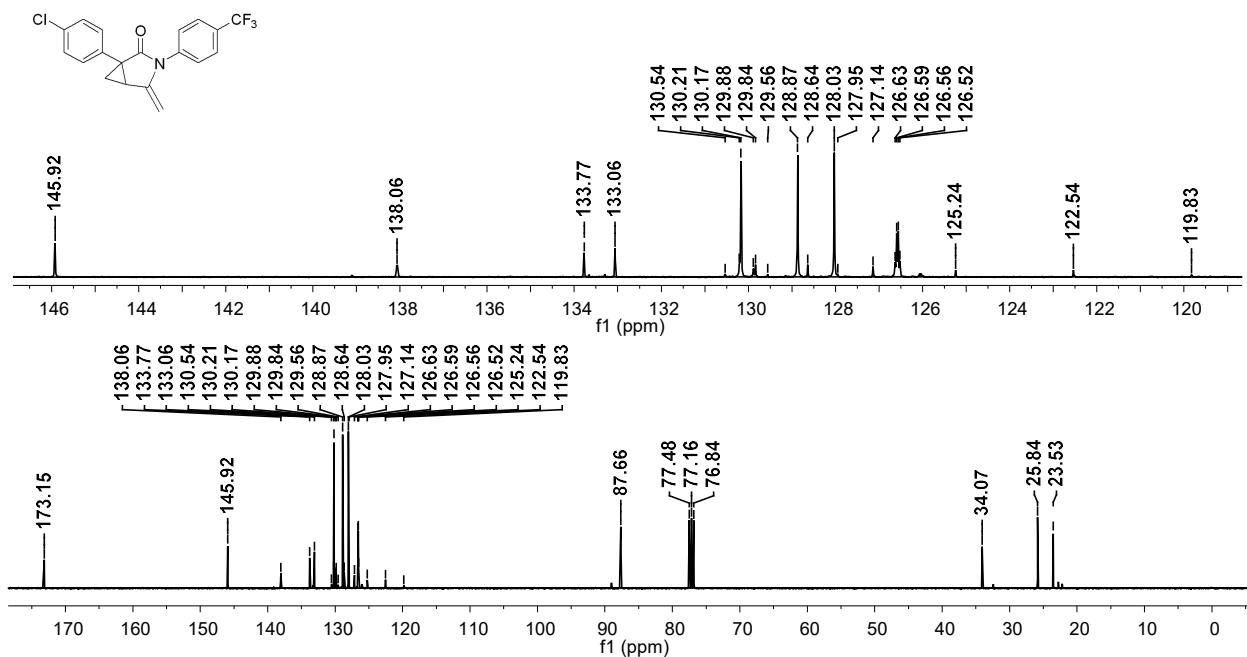

<sup>19</sup>F NMR spectra of **2g** (376 MHz, CDCl<sub>3</sub>)

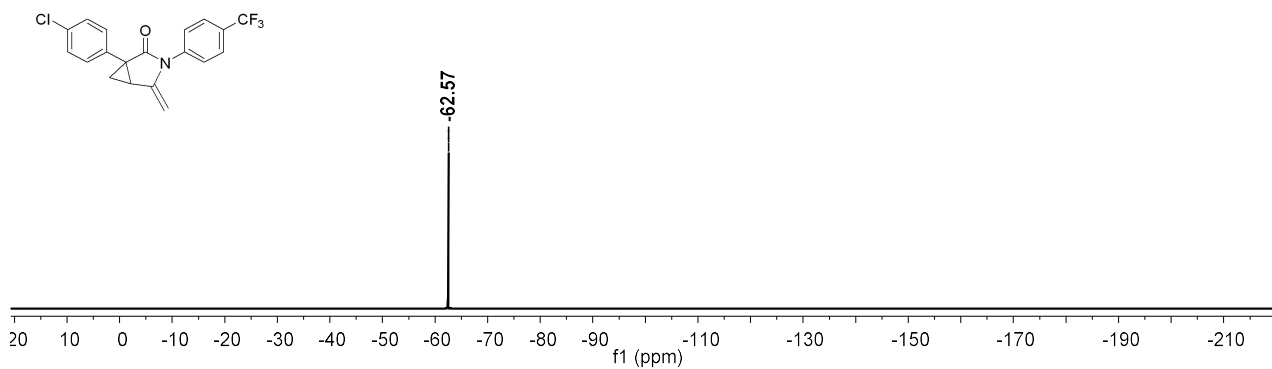

$^1\text{H}$  NMR spectra of **2h** (600 MHz,  $\text{CDCl}_3$ )

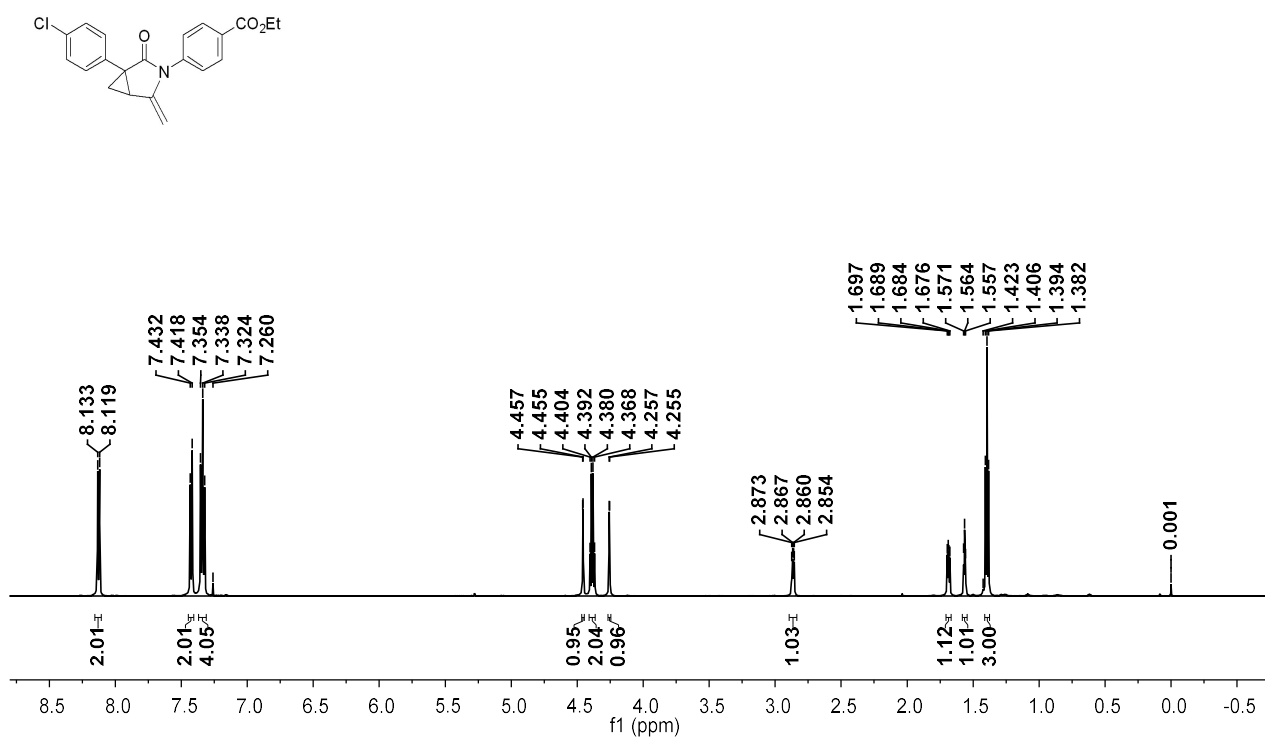

$^{13}\text{C}\{^1\text{H}\}$  NMR spectra of **2h** (151 MHz,  $\text{CDCl}_3$ )

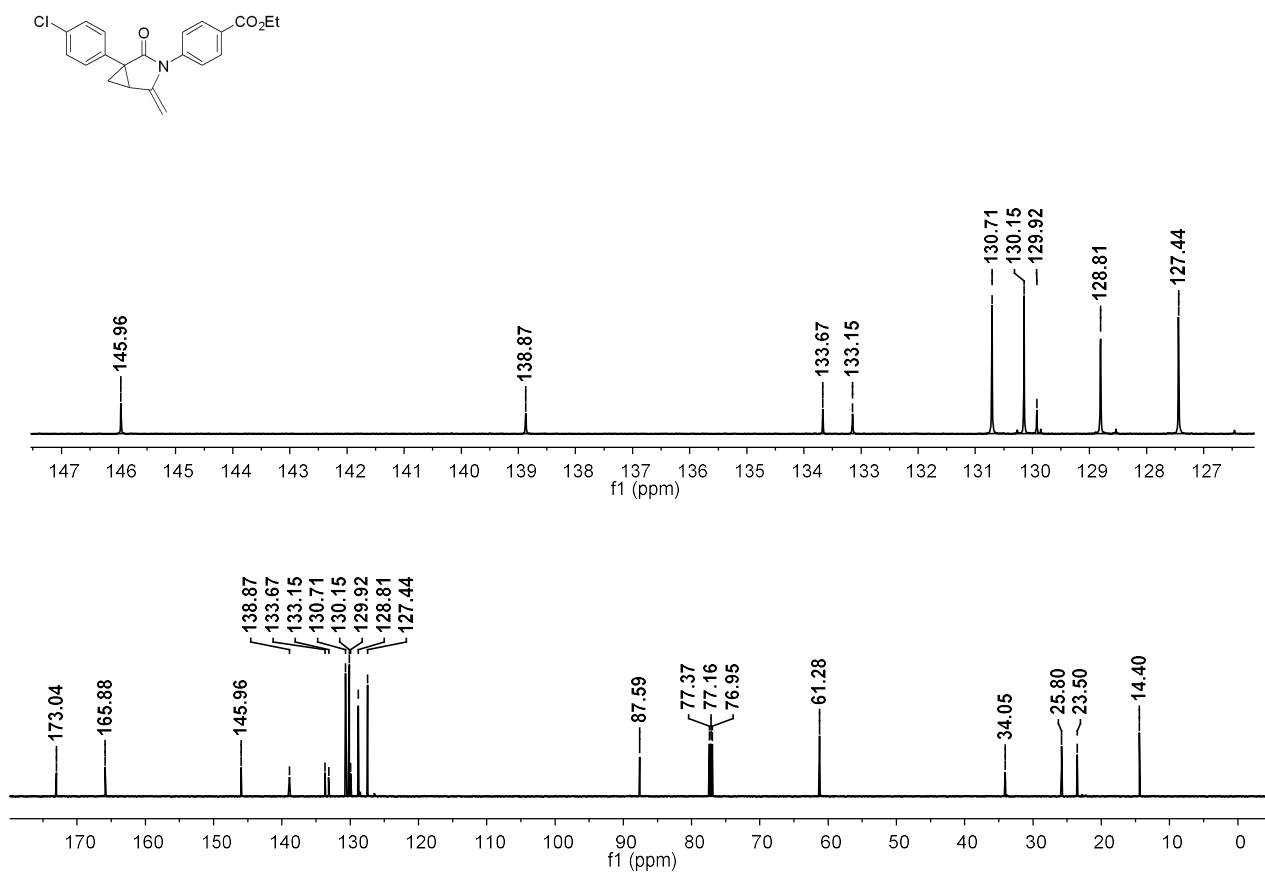

$^1\text{H}$  NMR spectra of **2i** (400 MHz,  $\text{CDCl}_3$ )

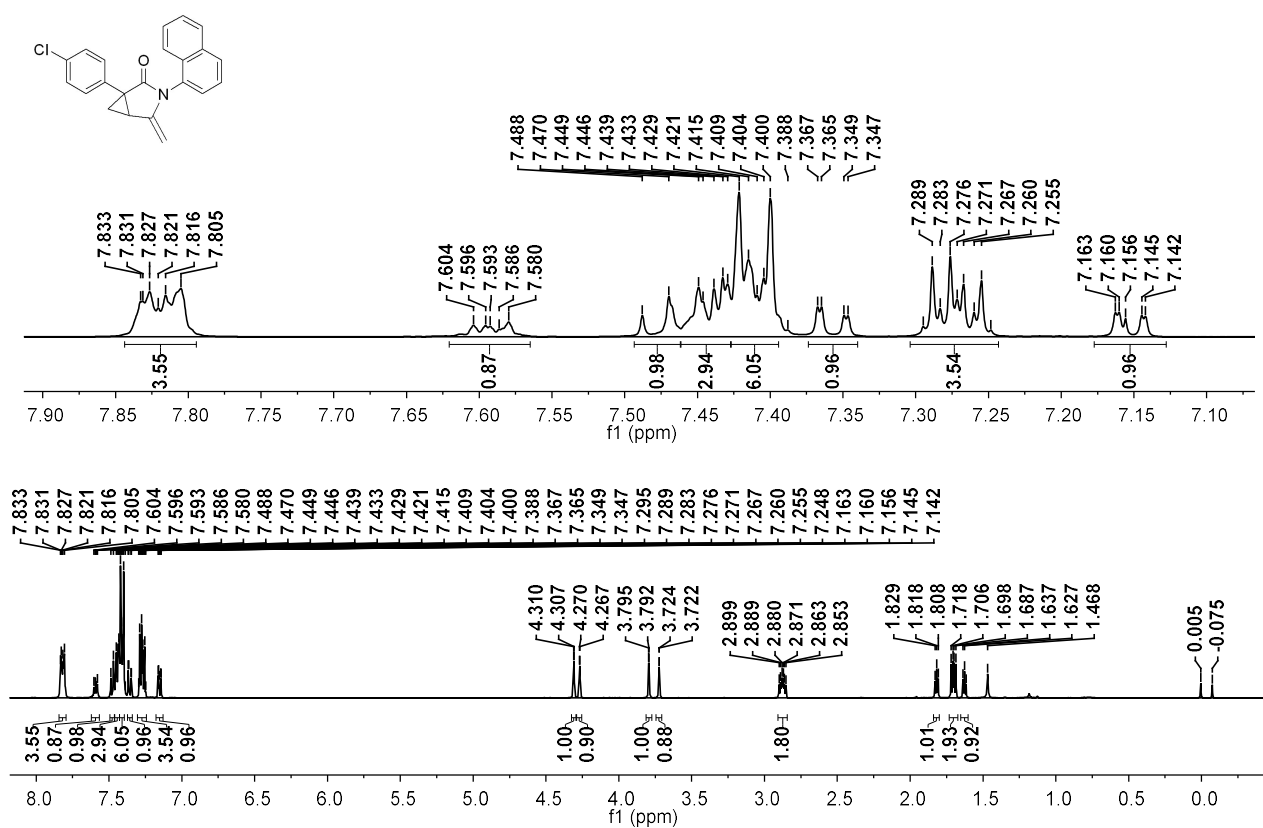

$^{13}\text{C}\{^1\text{H}\}$  NMR spectra of **2i** (151 MHz,  $\text{CDCl}_3$ )

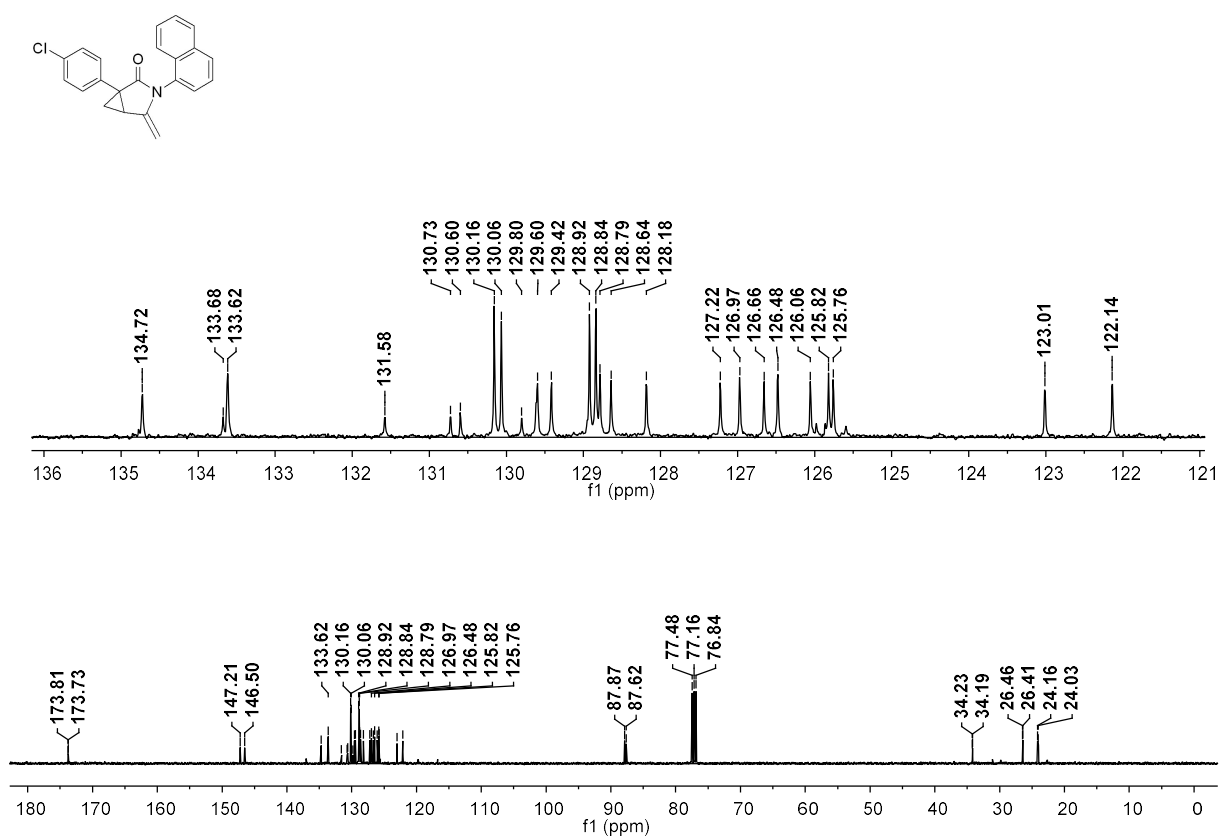

$^1\text{H}$  NMR spectra of **2k** (400 MHz,  $\text{CDCl}_3$ )

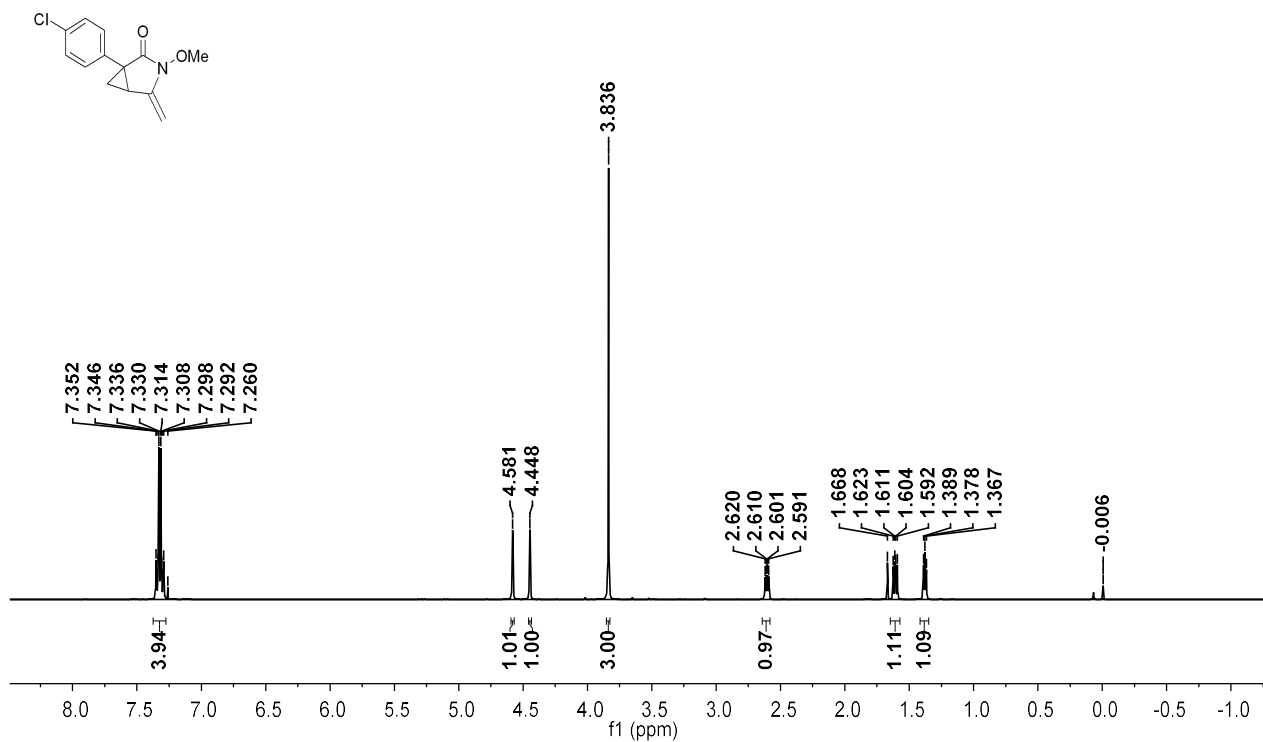

$^{13}\text{C}\{^1\text{H}\}$  NMR spectra of **2k** (101 MHz,  $\text{CDCl}_3$ )

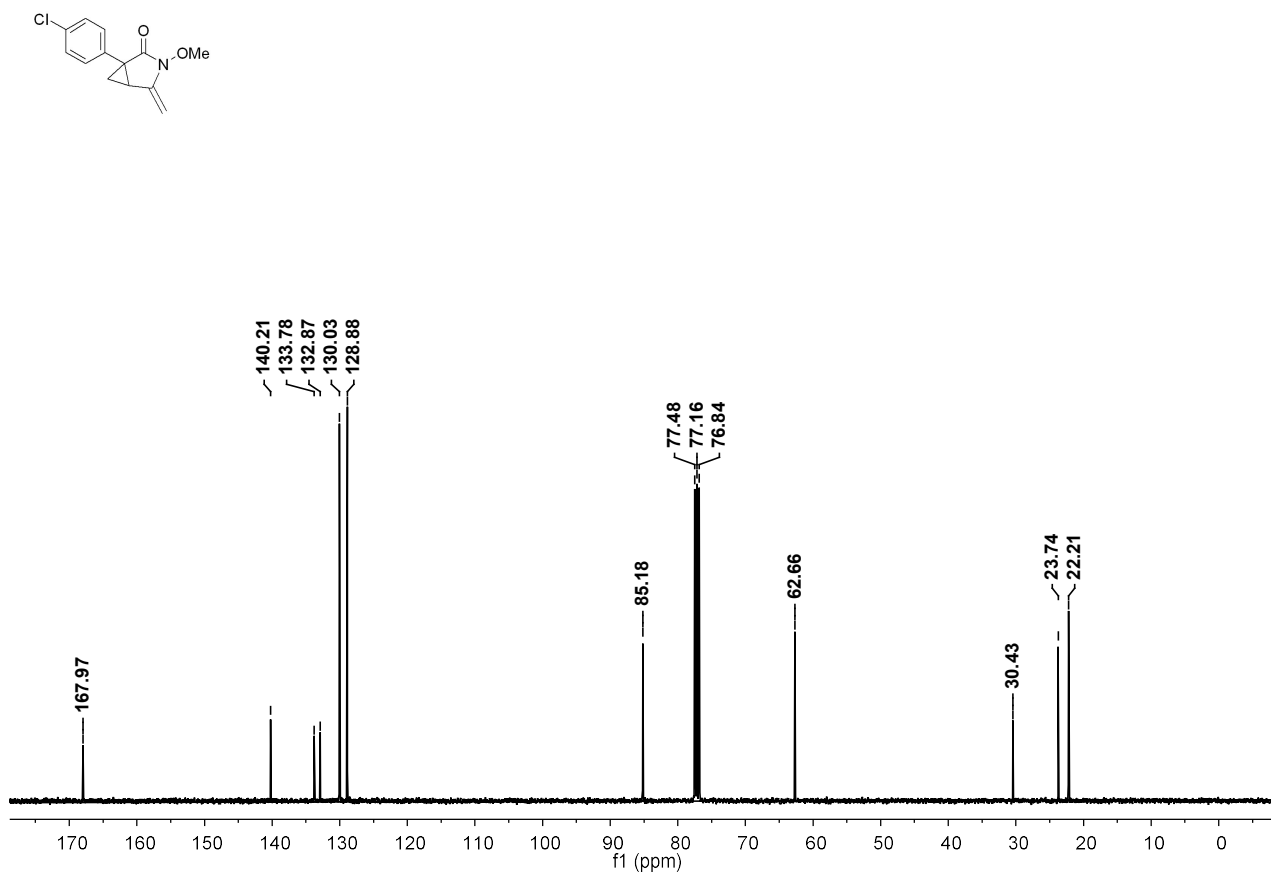



<sup>1</sup>H NMR spectra of **21** (400 MHz, CDCl<sub>3</sub>)

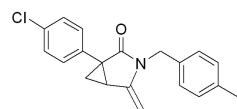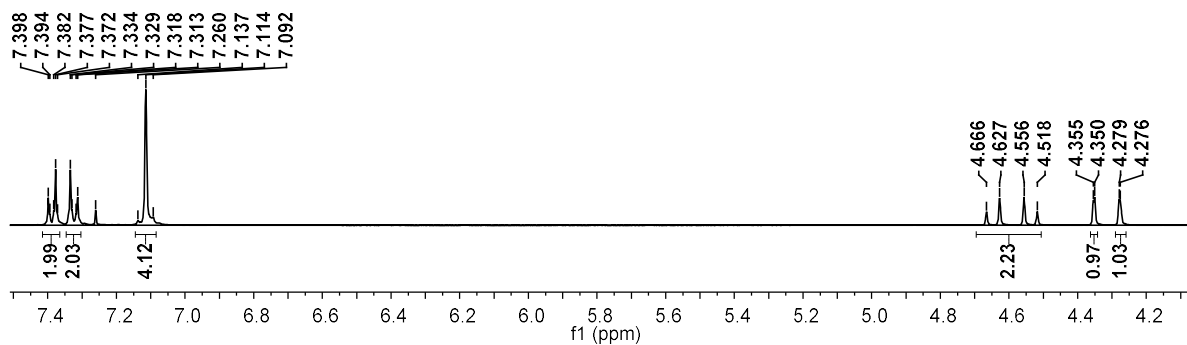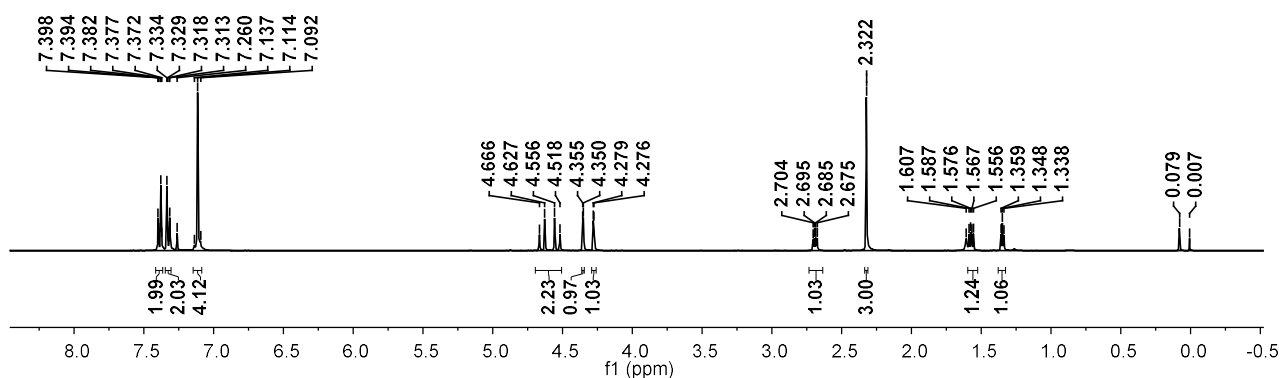

<sup>13</sup>C {<sup>1</sup>H} NMR spectra of **21** (101 MHz, CDCl<sub>3</sub>)

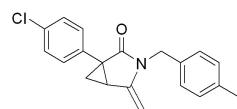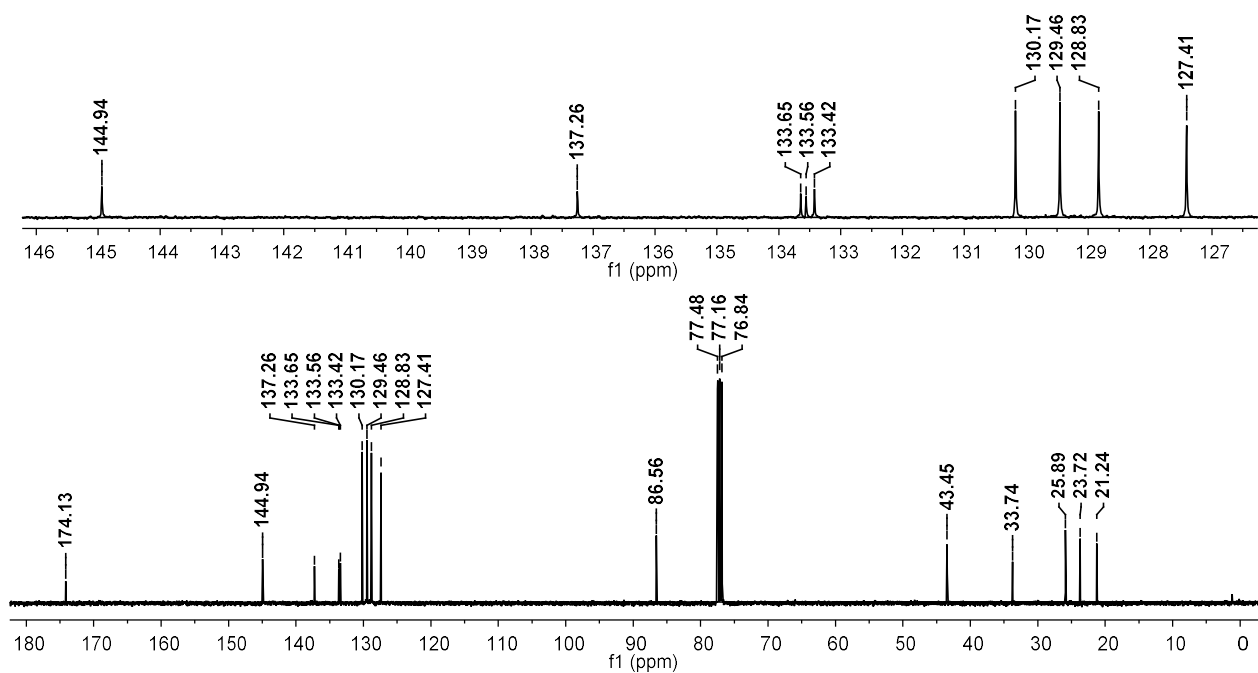

$^1\text{H}$  NMR spectra of **2m** (400 MHz,  $\text{CDCl}_3$ )

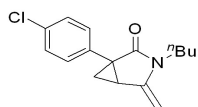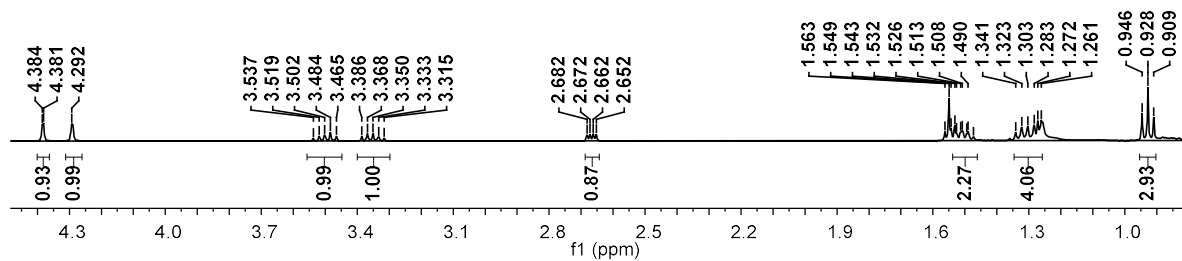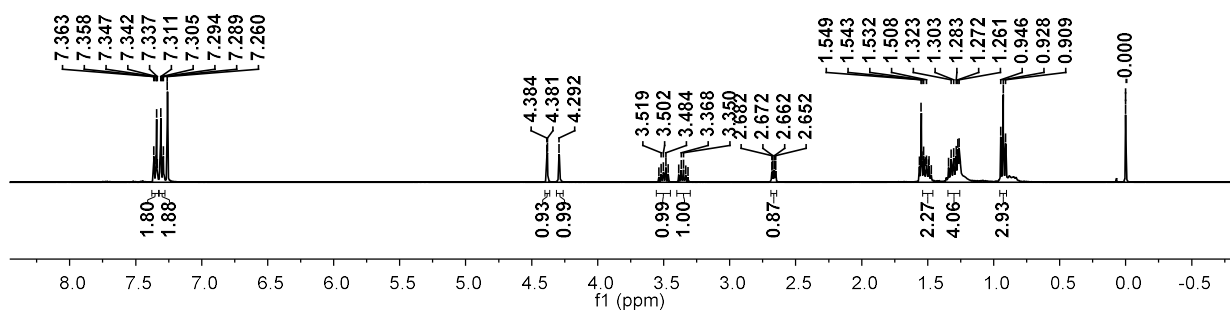

$^{13}\text{C}\{^1\text{H}\}$  NMR spectra of **2m** (101 MHz,  $\text{CDCl}_3$ )

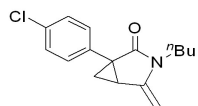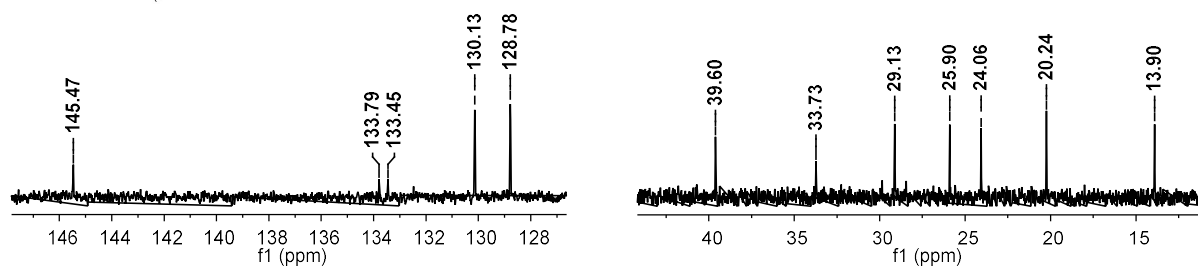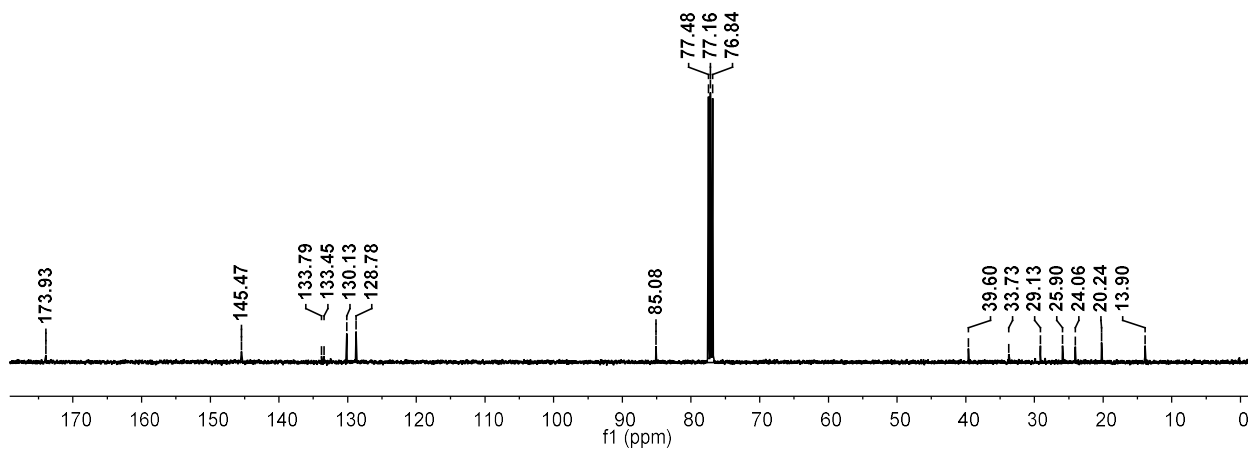

$^1\text{H}$  NMR spectra of **2p** (400 MHz,  $\text{CDCl}_3$ )

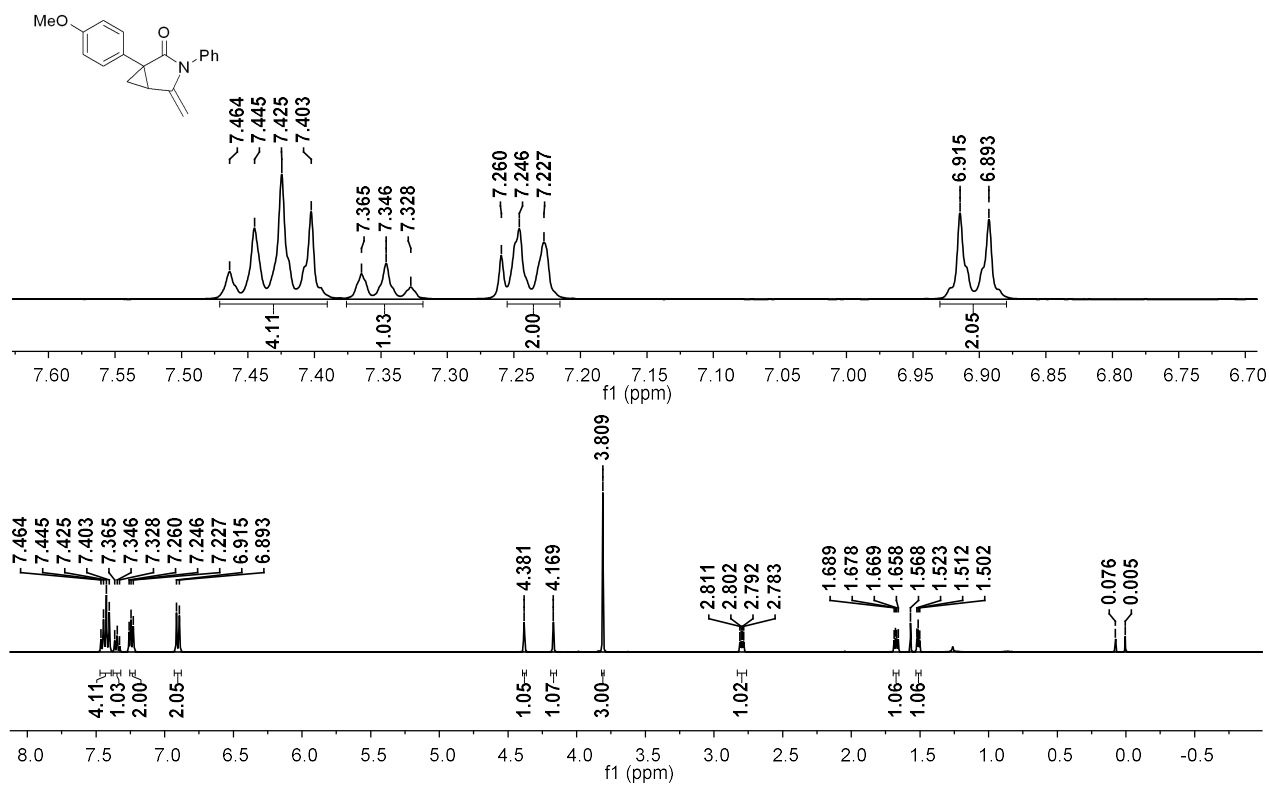

$^{13}\text{C}\{^1\text{H}\}$  NMR spectra of **2p** (101 MHz,  $\text{CDCl}_3$ )

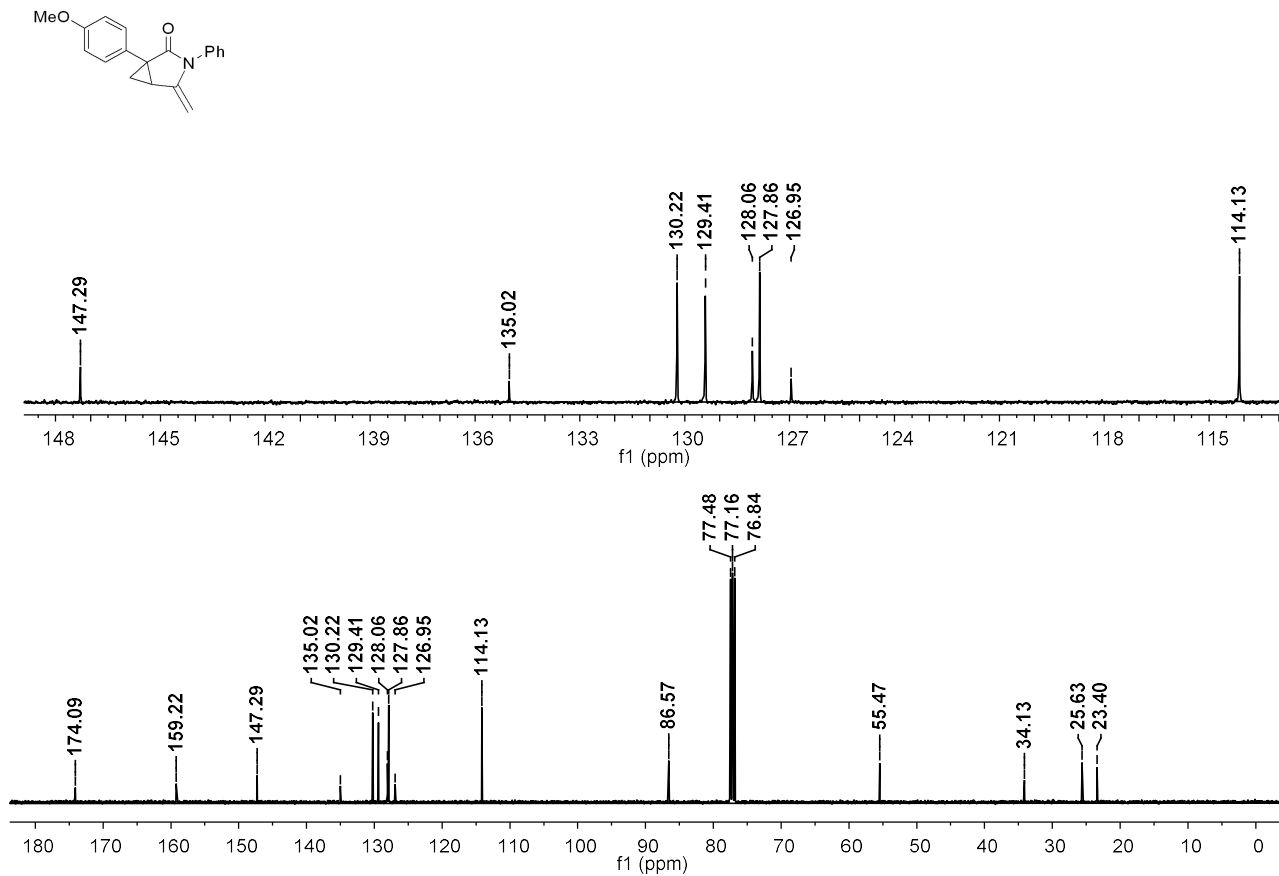

$^1\text{H}$  NMR spectra of **2q** (400 MHz,  $\text{CDCl}_3$ )

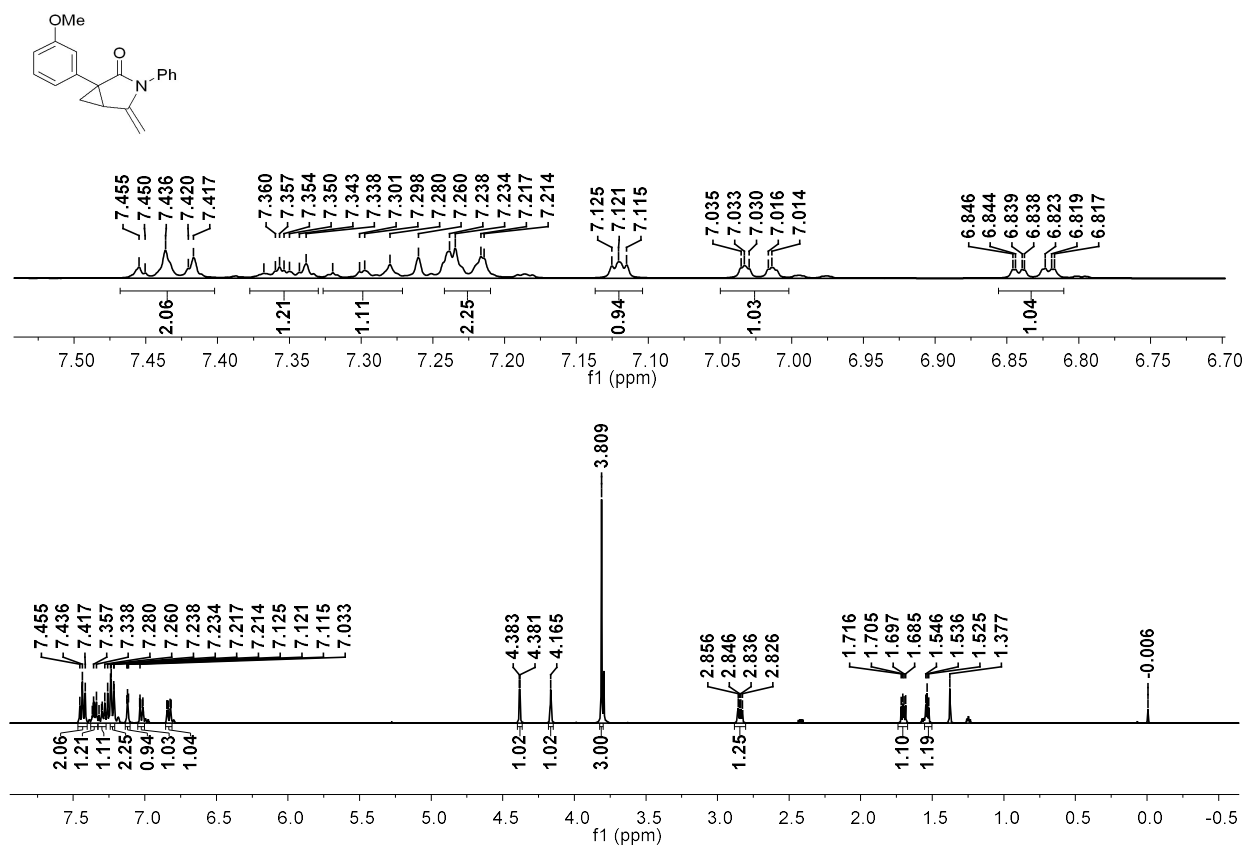

$^{13}\text{C}\{^1\text{H}\}$  NMR spectra of **2q** (101 MHz,  $\text{CDCl}_3$ )

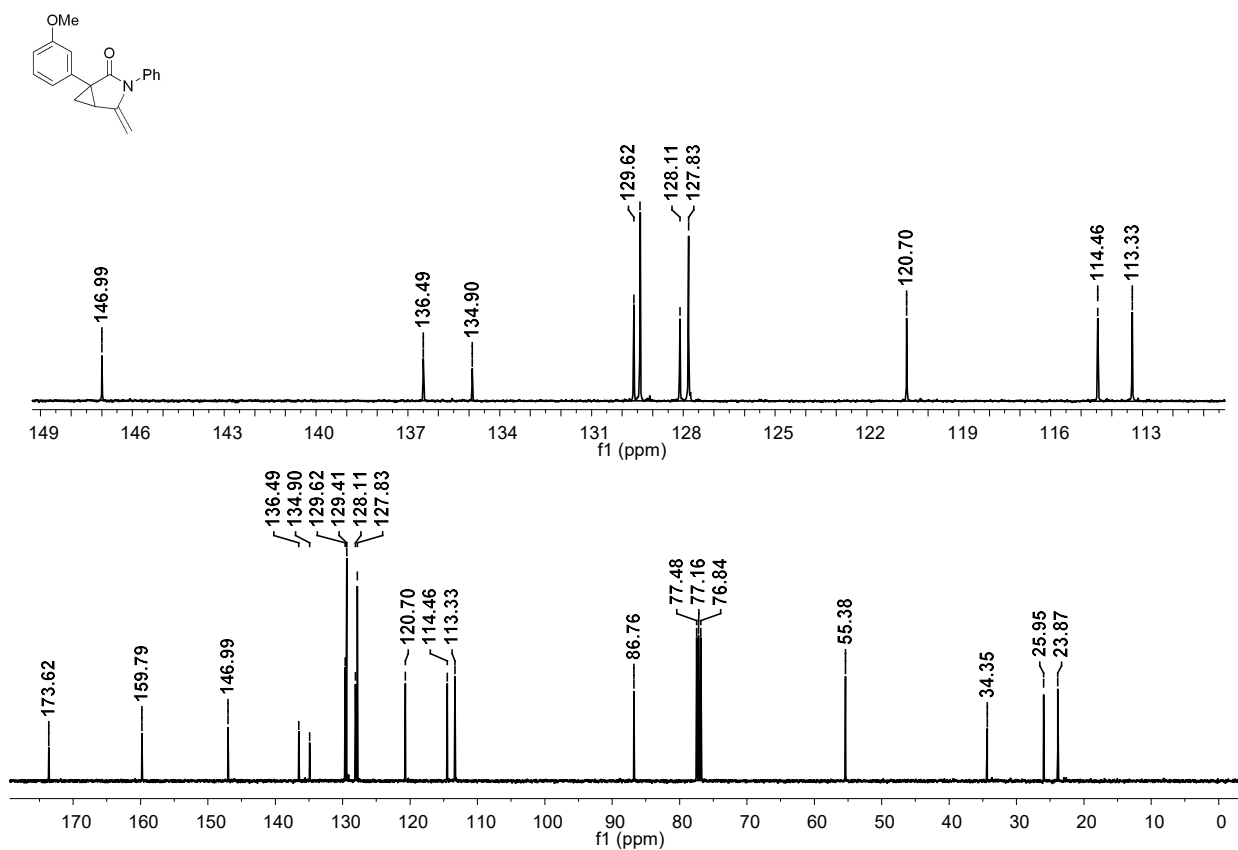

$^1\text{H}$  NMR spectra of **2r** (600 MHz,  $\text{CDCl}_3$ )

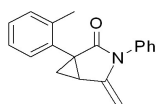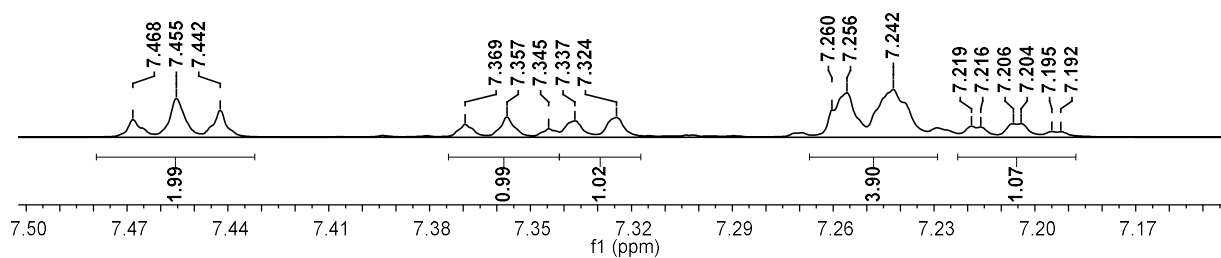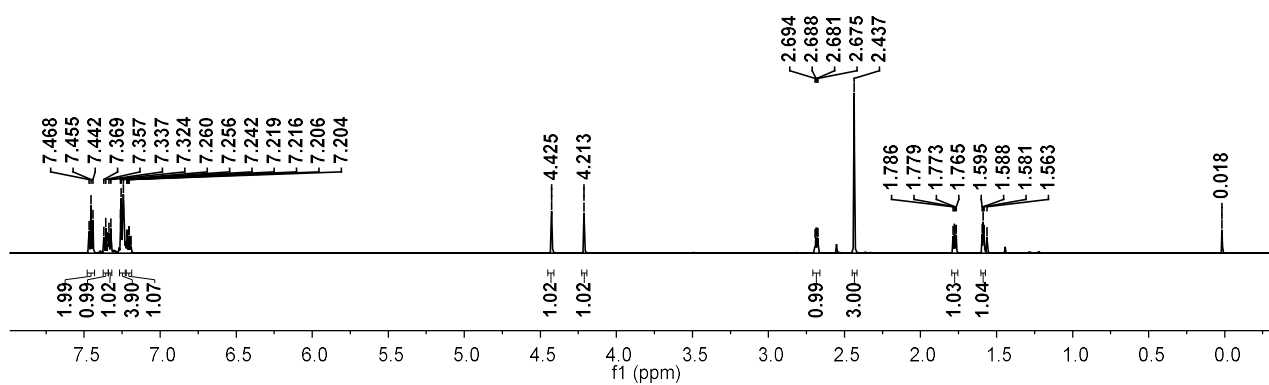

$^{13}\text{C}\{^1\text{H}\}$  NMR spectra of **2r** (151 MHz,  $\text{CDCl}_3$ )

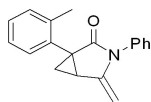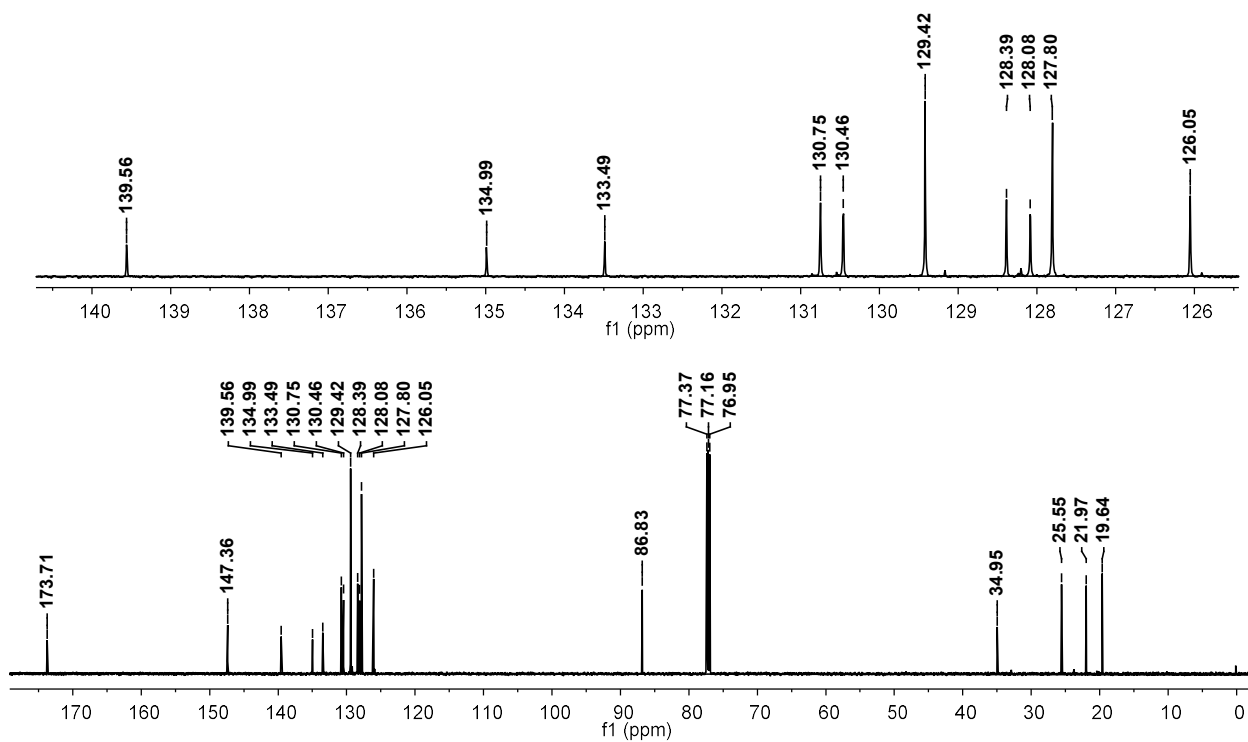

$^{13}\text{C}$  NMR spectra of **2s** (151 MHz,  $\text{CDCl}_3$ )

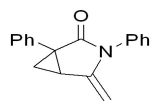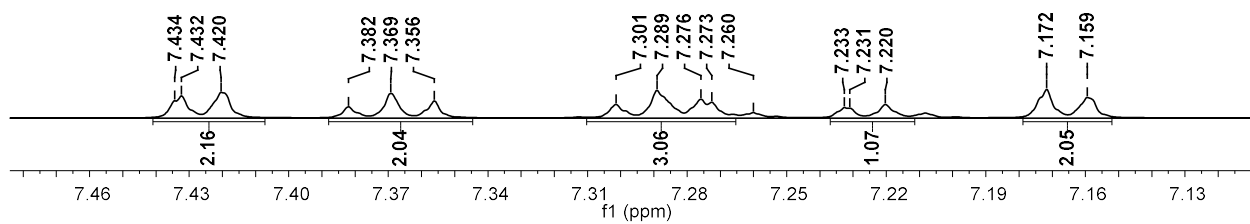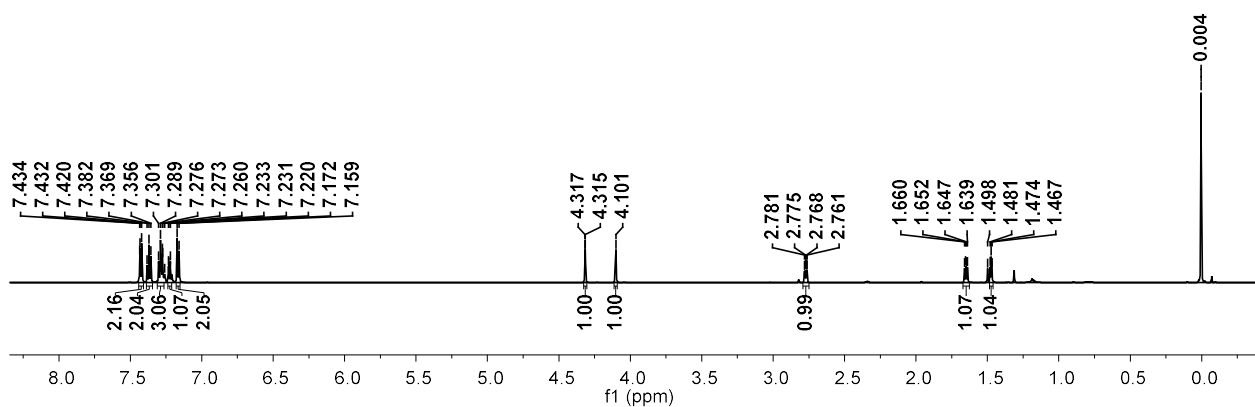

$^{13}\text{C}\{^1\text{H}\}$  NMR spectra of **2s** (151 MHz,  $\text{CDCl}_3$ )

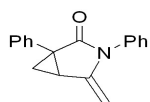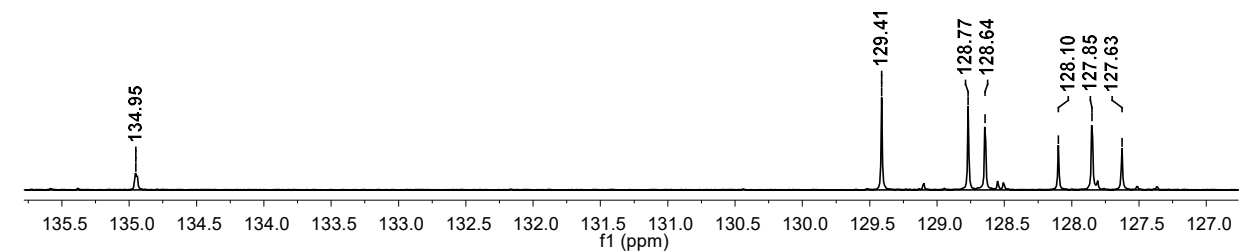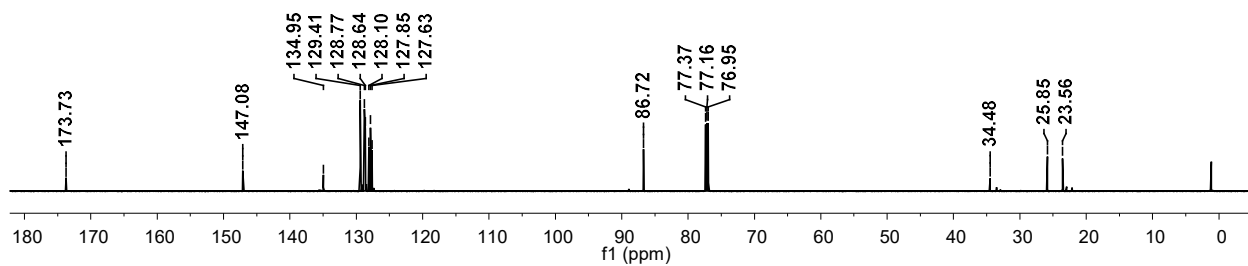

$^1\text{H}$  NMR spectra of **2t** (600 MHz,  $\text{CDCl}_3$ )

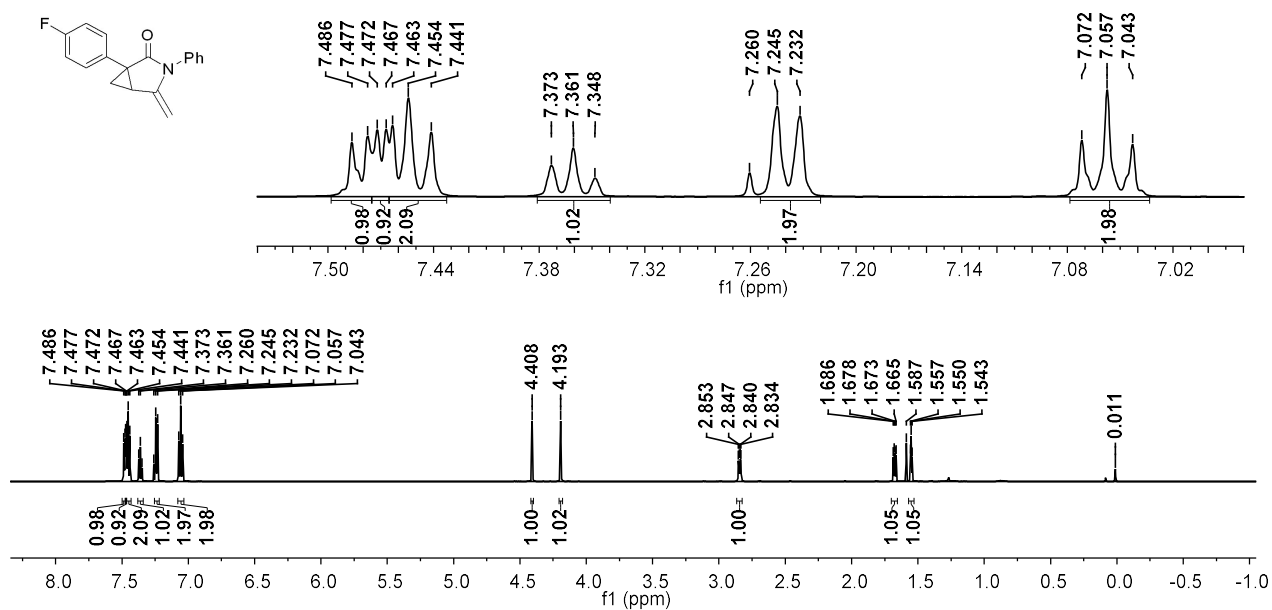

$^{13}\text{C}\{^1\text{H}\}$  NMR spectra of **2t** (151 MHz,  $\text{CDCl}_3$ )

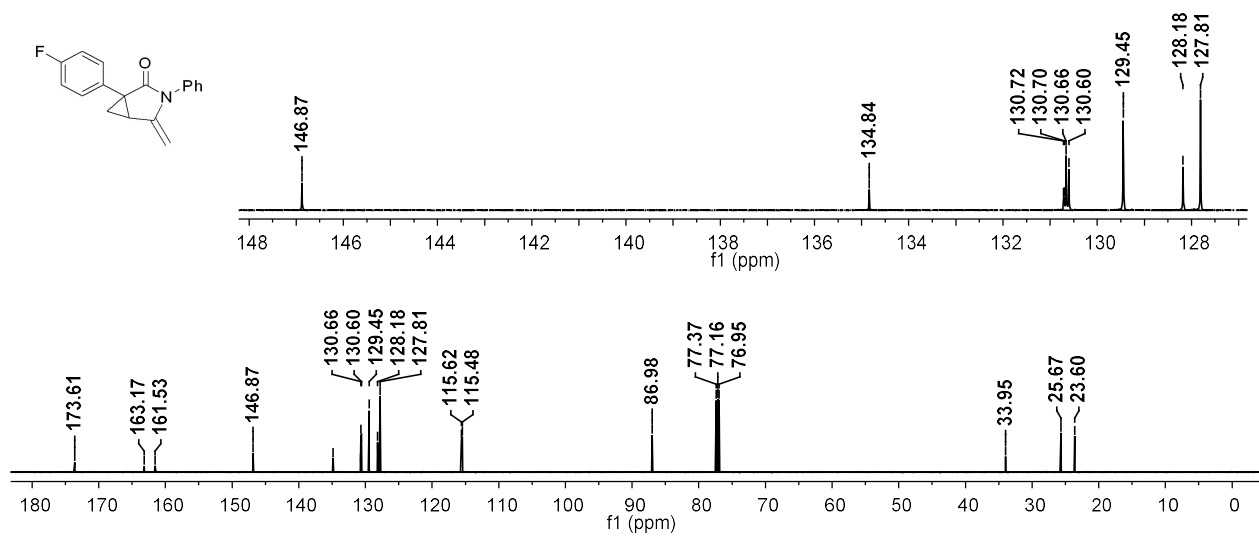

$^{19}\text{F}$  NMR spectra of **2t** (565 MHz,  $\text{CDCl}_3$ )

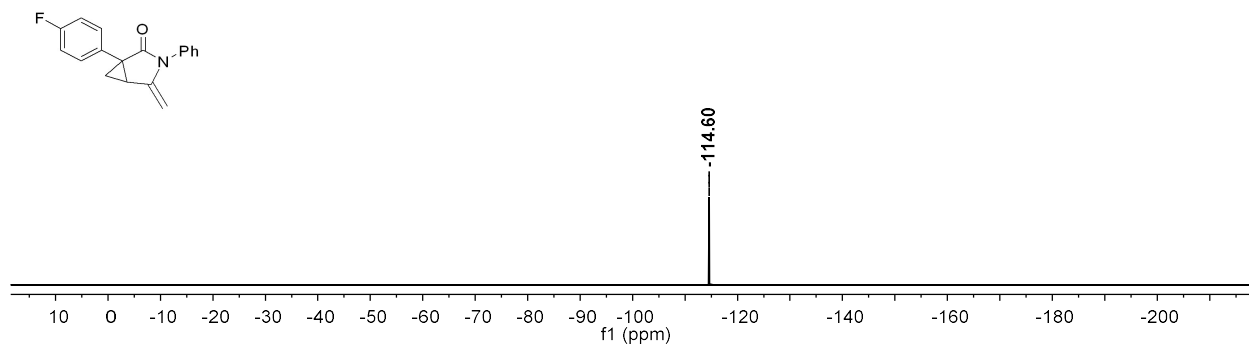

$^1\text{H}$  NMR spectra of **2u** (400 MHz,  $\text{CDCl}_3$ )

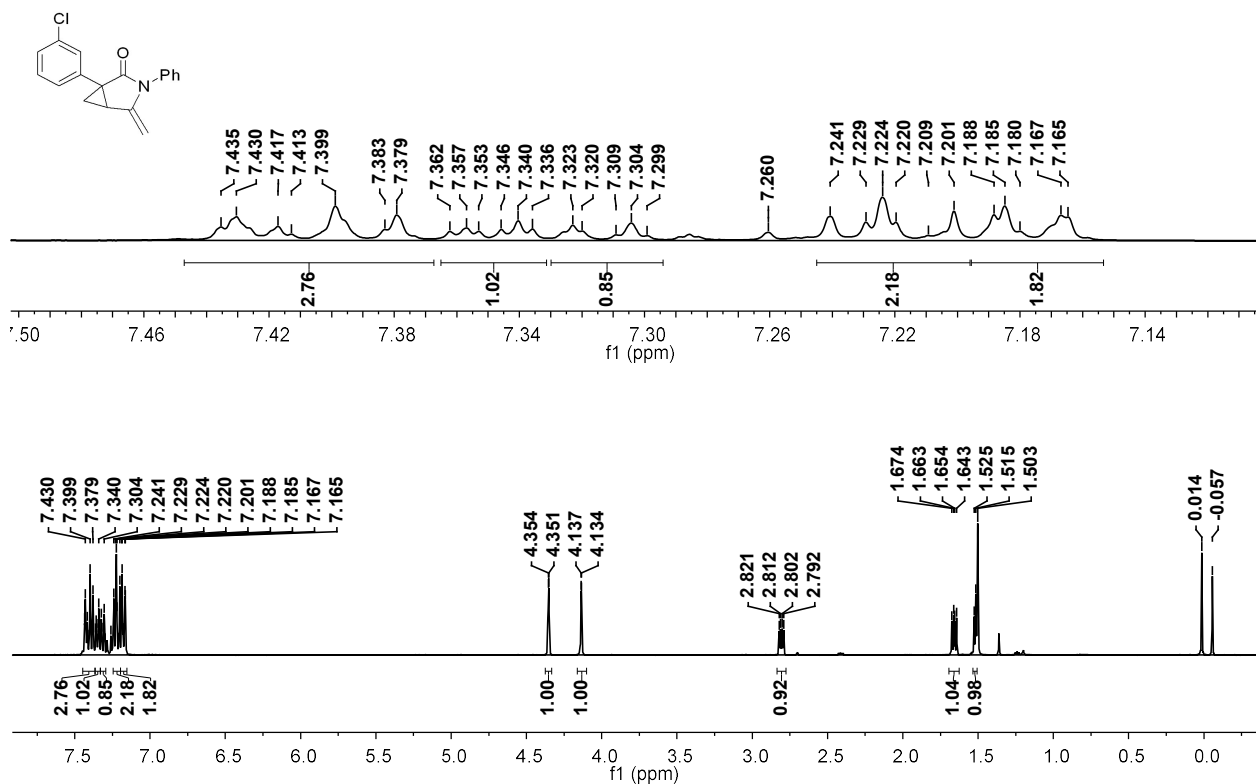

$^{13}\text{C}\{^1\text{H}\}$  NMR spectra of **2u** (101 MHz,  $\text{CDCl}_3$ )

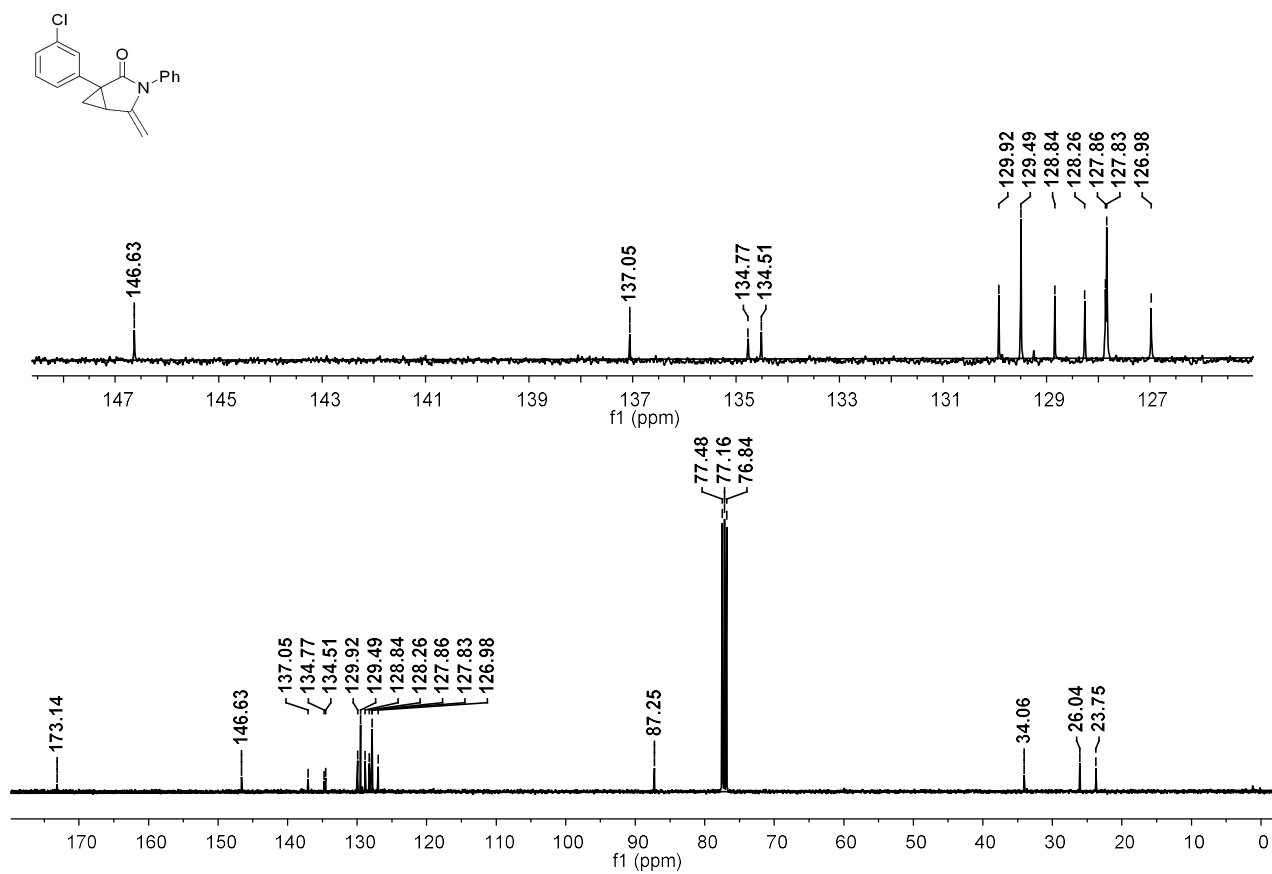



$^1\text{H}$  NMR spectra of **2v** (600 MHz,  $\text{CDCl}_3$ )

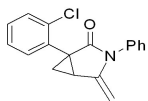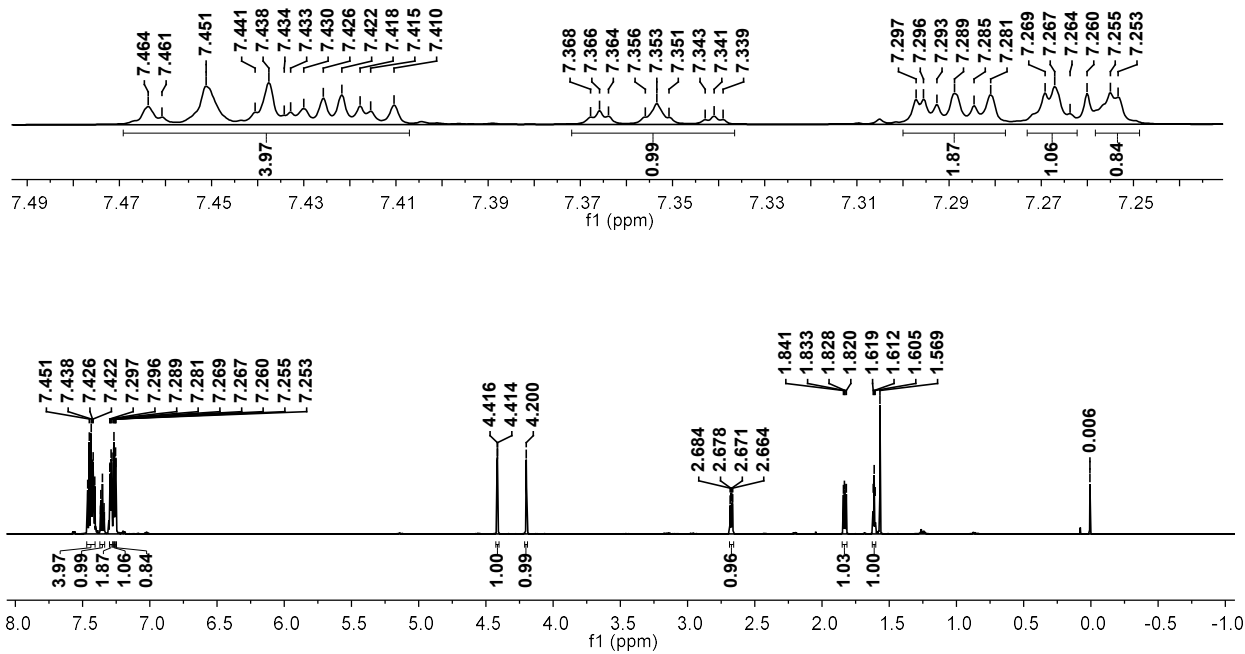

$^{13}\text{C}\{^1\text{H}\}$  NMR spectra of **2v** (151 MHz,  $\text{CDCl}_3$ )

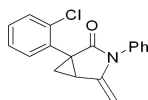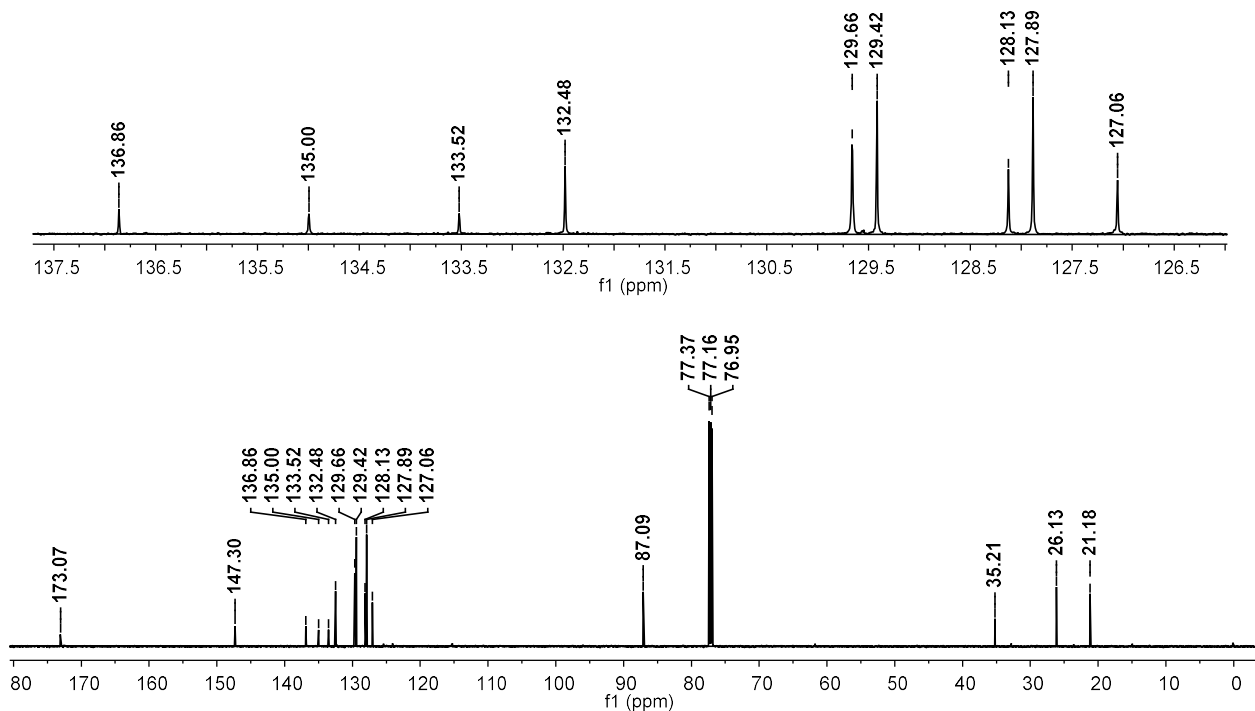

$^1\text{H}$  NMR spectra of **2w** (600 MHz,  $\text{CDCl}_3$ )

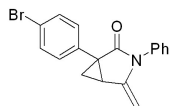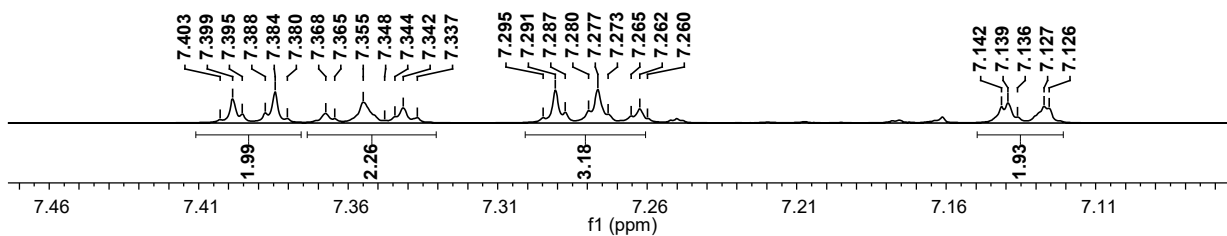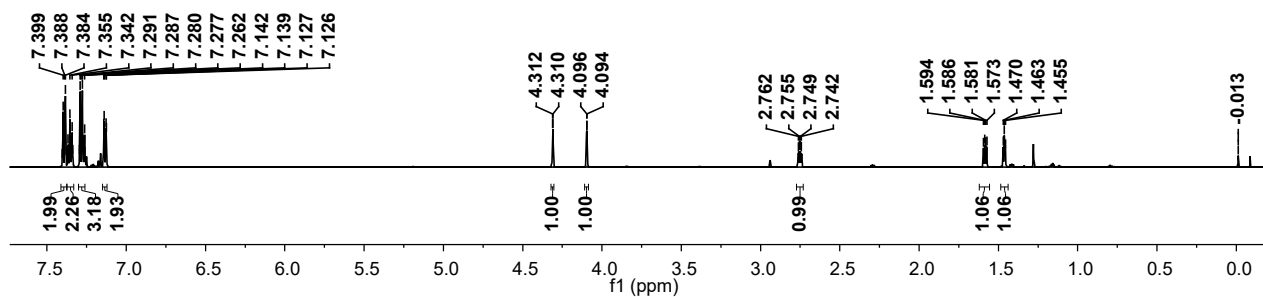

$^{13}\text{C}\{^1\text{H}\}$  NMR spectra of **2w** (101 MHz,  $\text{CDCl}_3$ )

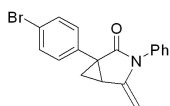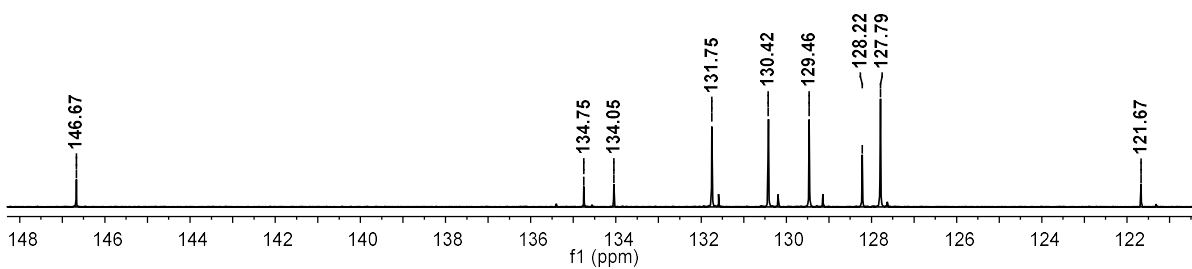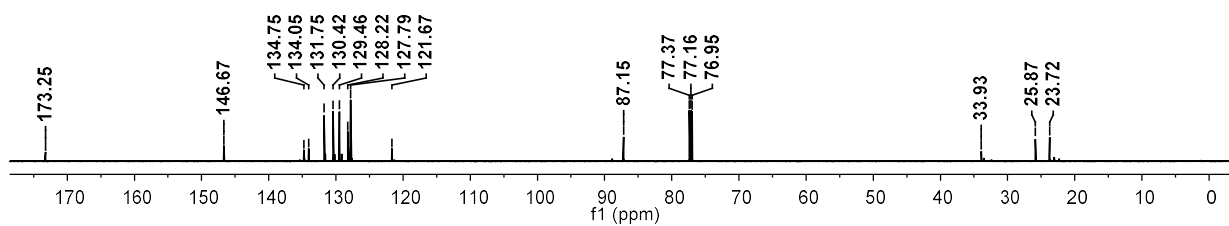

$^1\text{H}$  NMR spectra of **2x** (400 MHz,  $\text{CDCl}_3$ )

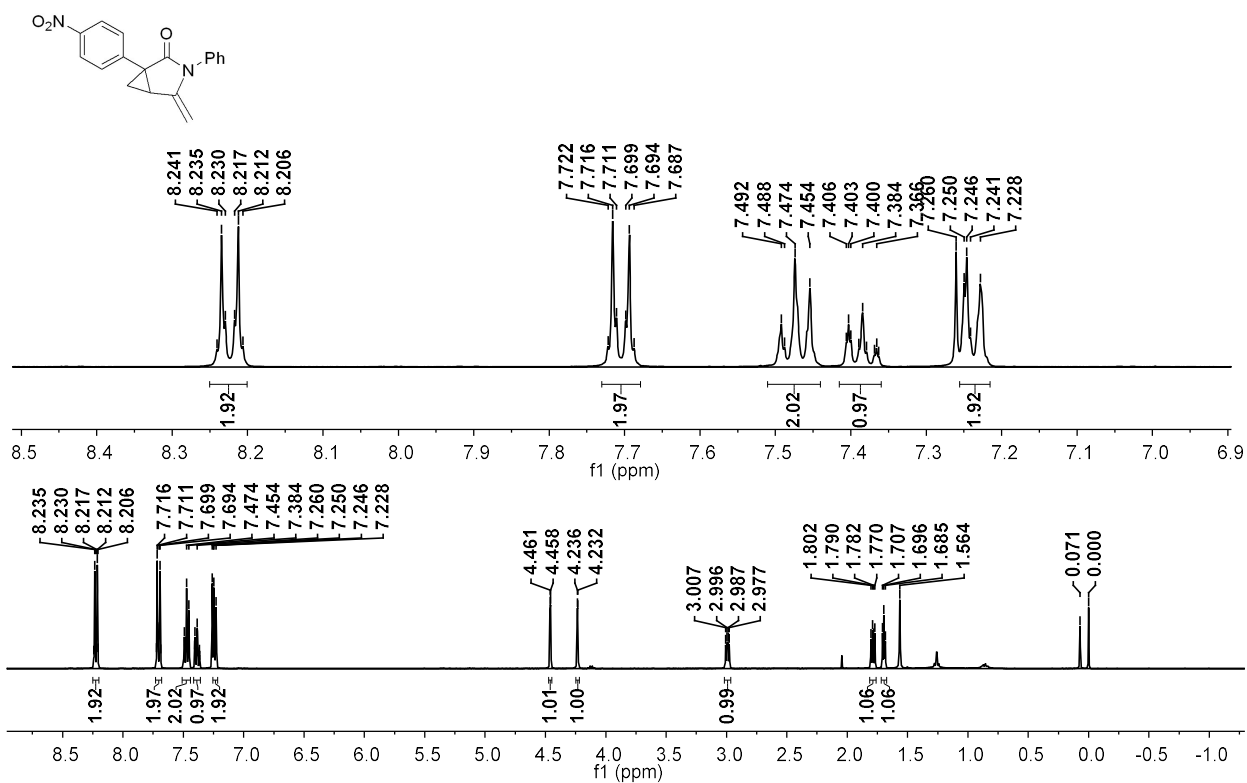

**<sup>13</sup>C{<sup>1</sup>H} NMR spectra of 2x (101 MHz, CDCl<sub>3</sub>)**

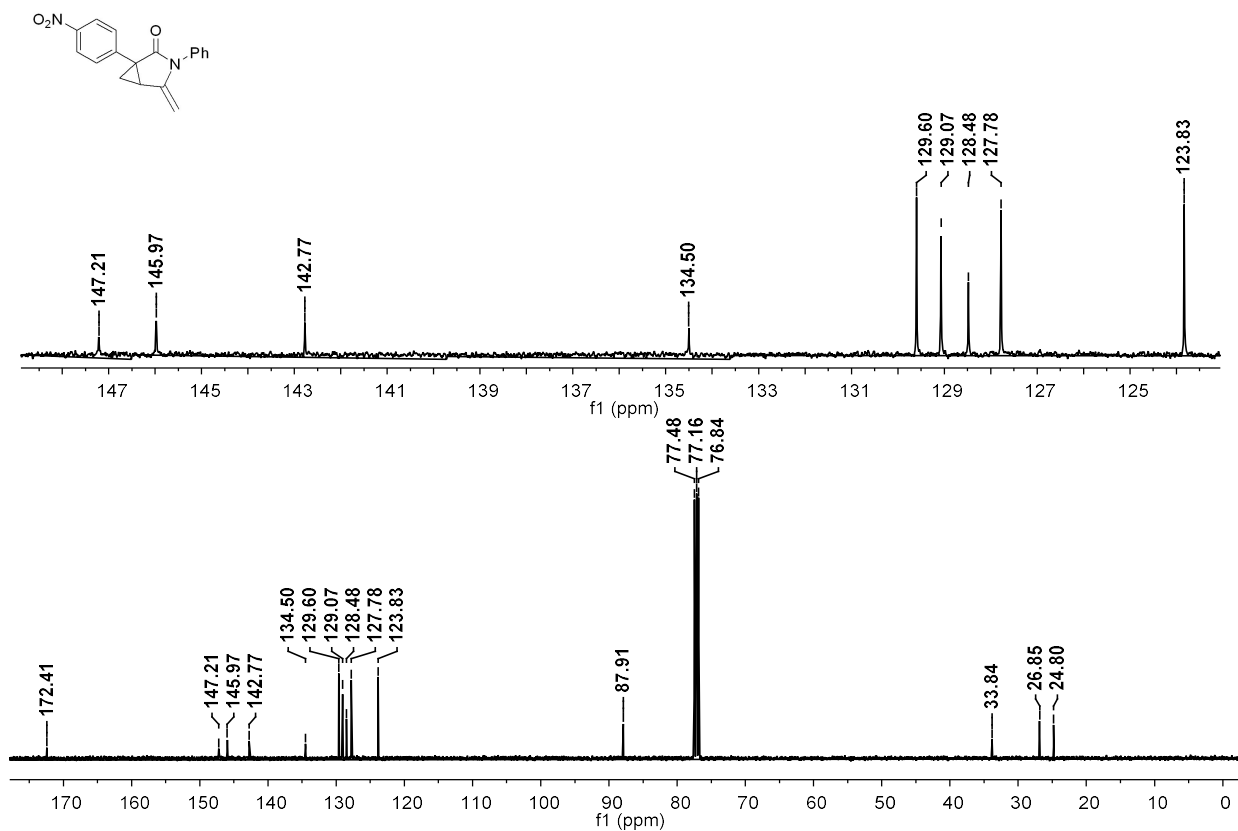

**<sup>1</sup>H NMR spectra of 2y (600 MHz, CDCl<sub>3</sub>)**

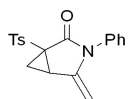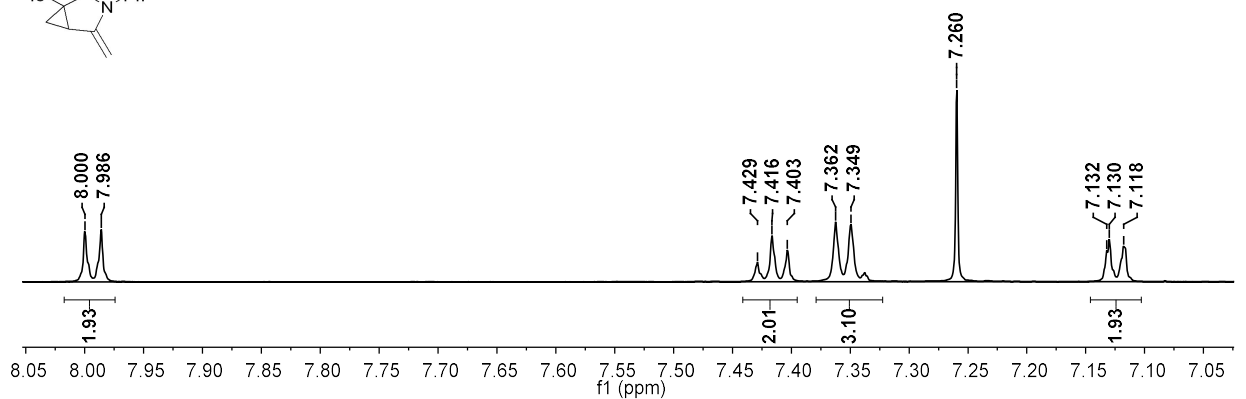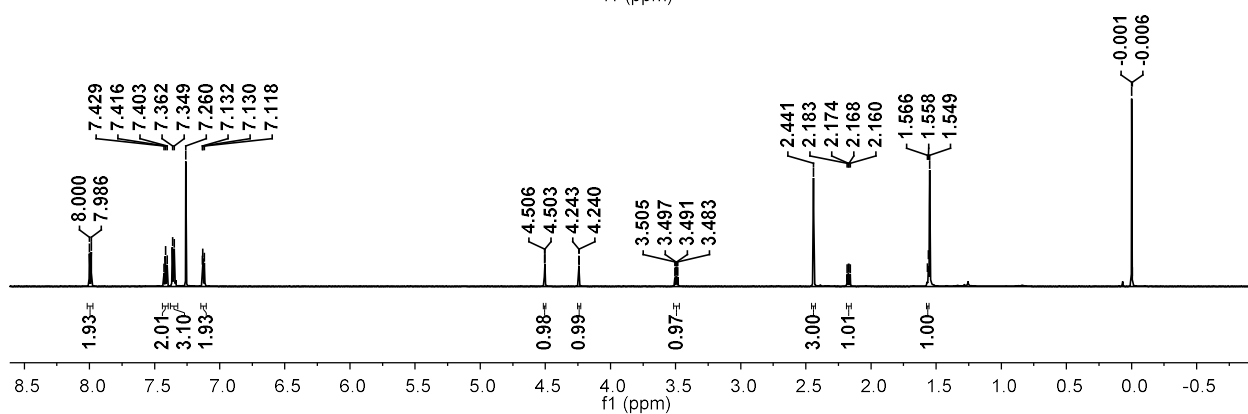

$^{13}\text{C}\{^1\text{H}\}$  NMR spectra of **2y** (101 MHz,  $\text{CDCl}_3$ )

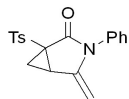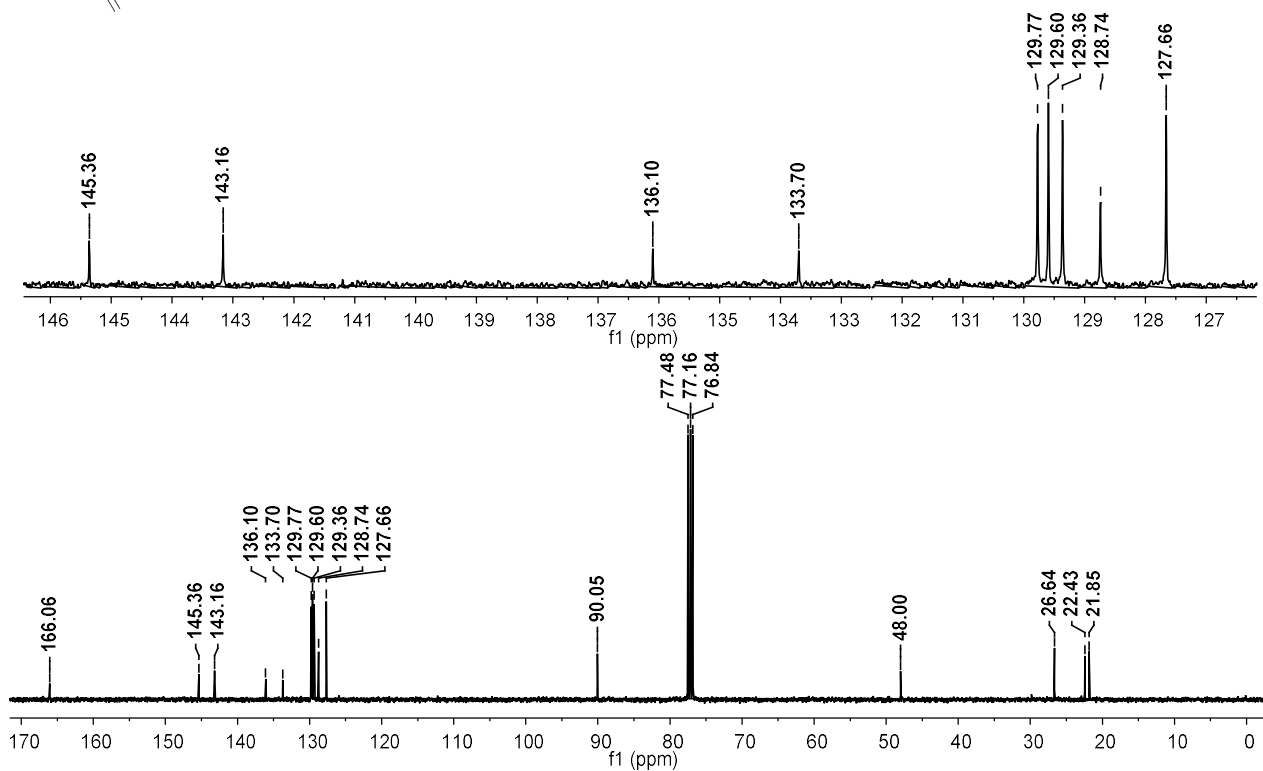

$^{13}\text{C}$  NMR spectra of **2z** (400 MHz,  $\text{CDCl}_3$ )

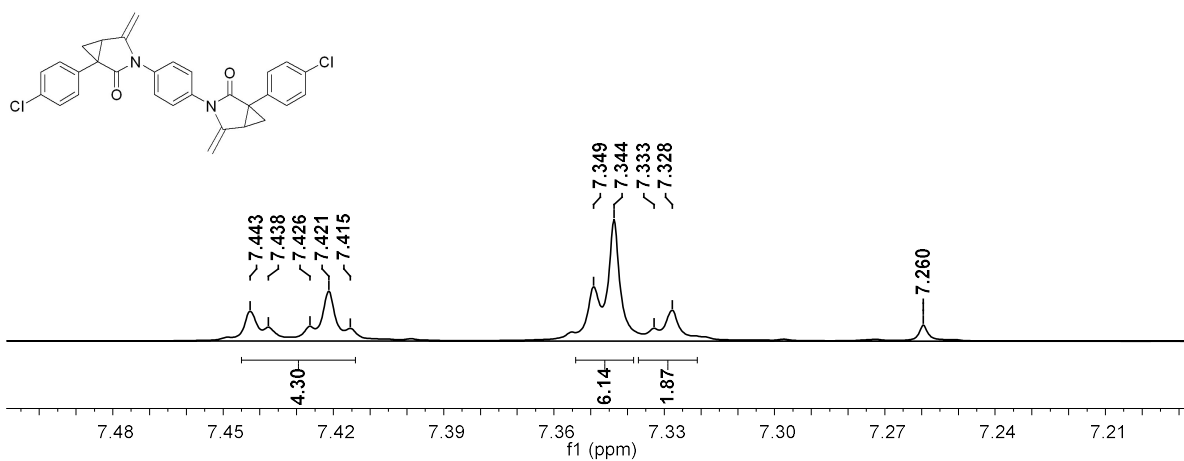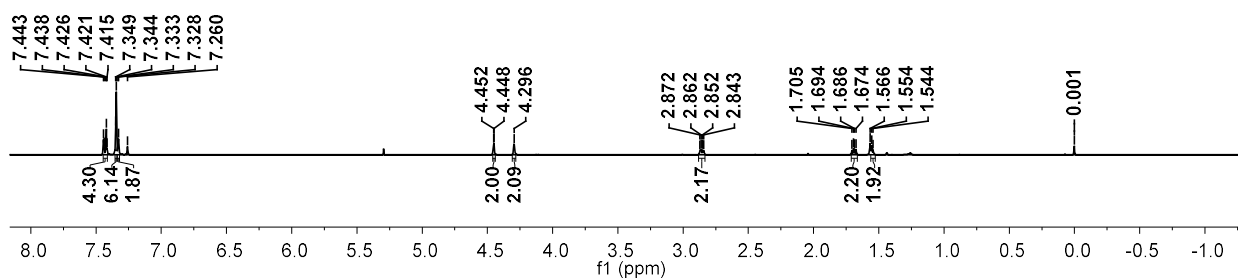

<sup>13</sup>C{<sup>1</sup>H} NMR spectra of **2z** (101 MHz, CDCl<sub>3</sub>)

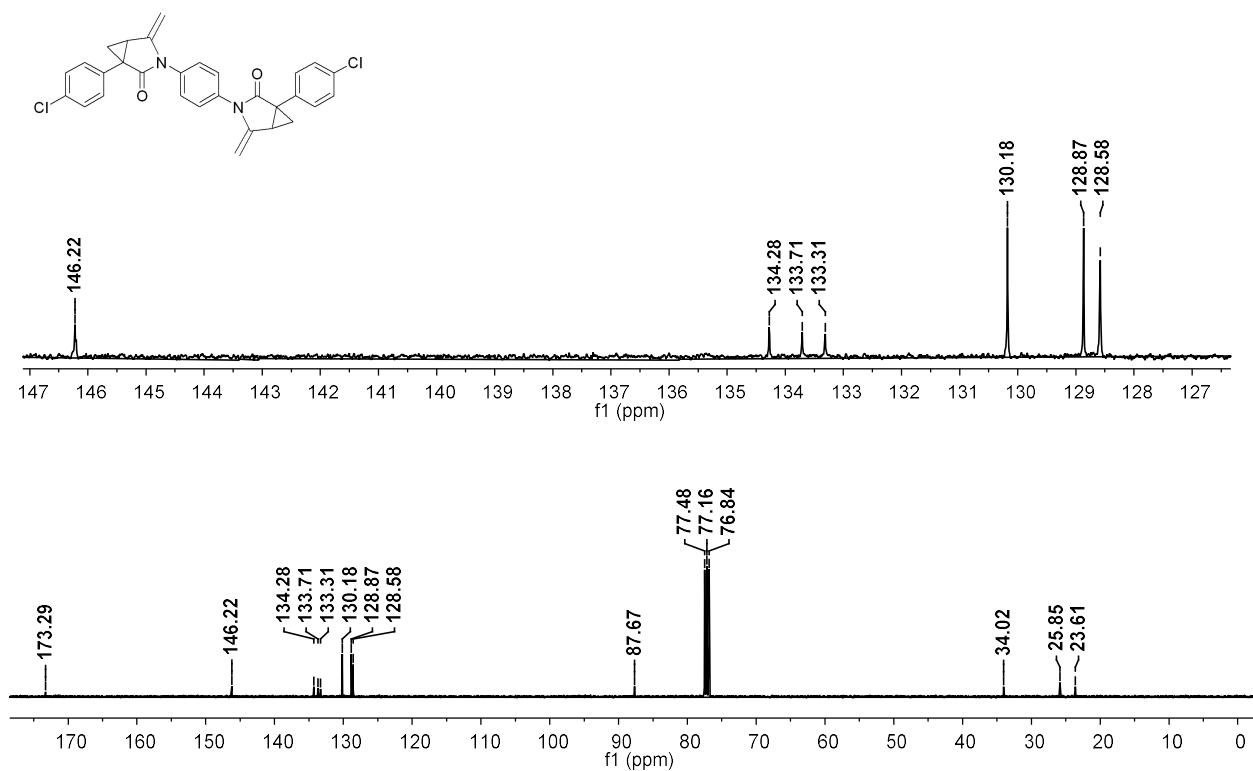

<sup>1</sup>H NMR spectra of **2aa** (400 MHz, CDCl<sub>3</sub>)

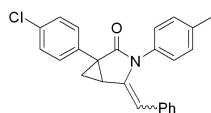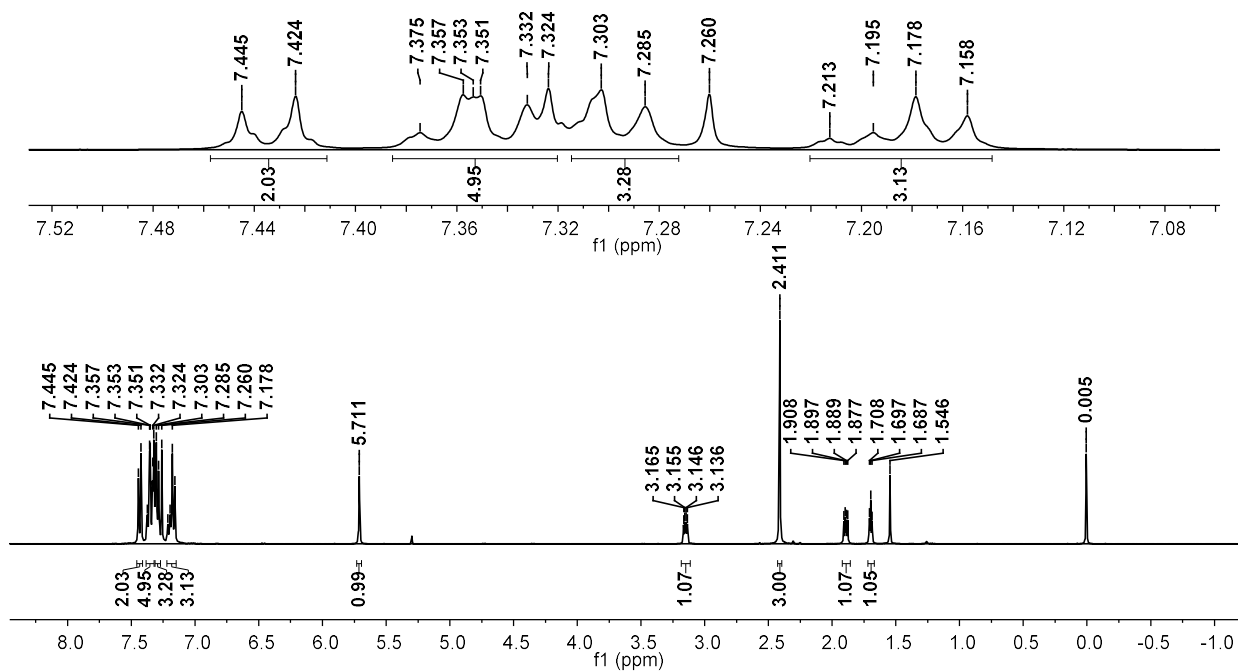

$^{13}\text{C}\{^1\text{H}\}$  NMR spectra of **2aa** (101 MHz,  $\text{CDCl}_3$ )

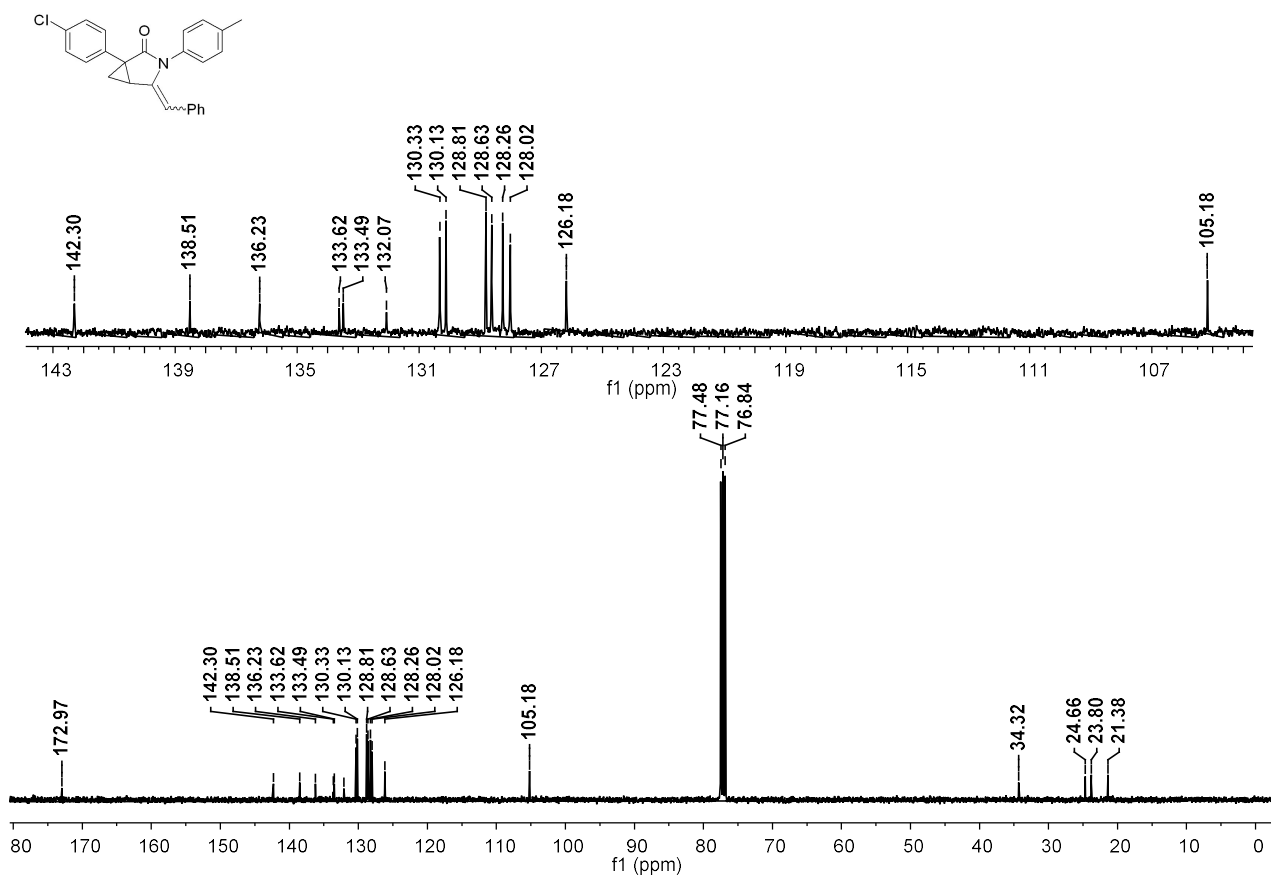

$^1\text{H}$  NMR spectra of **2ab** (400 MHz,  $\text{CDCl}_3$ )

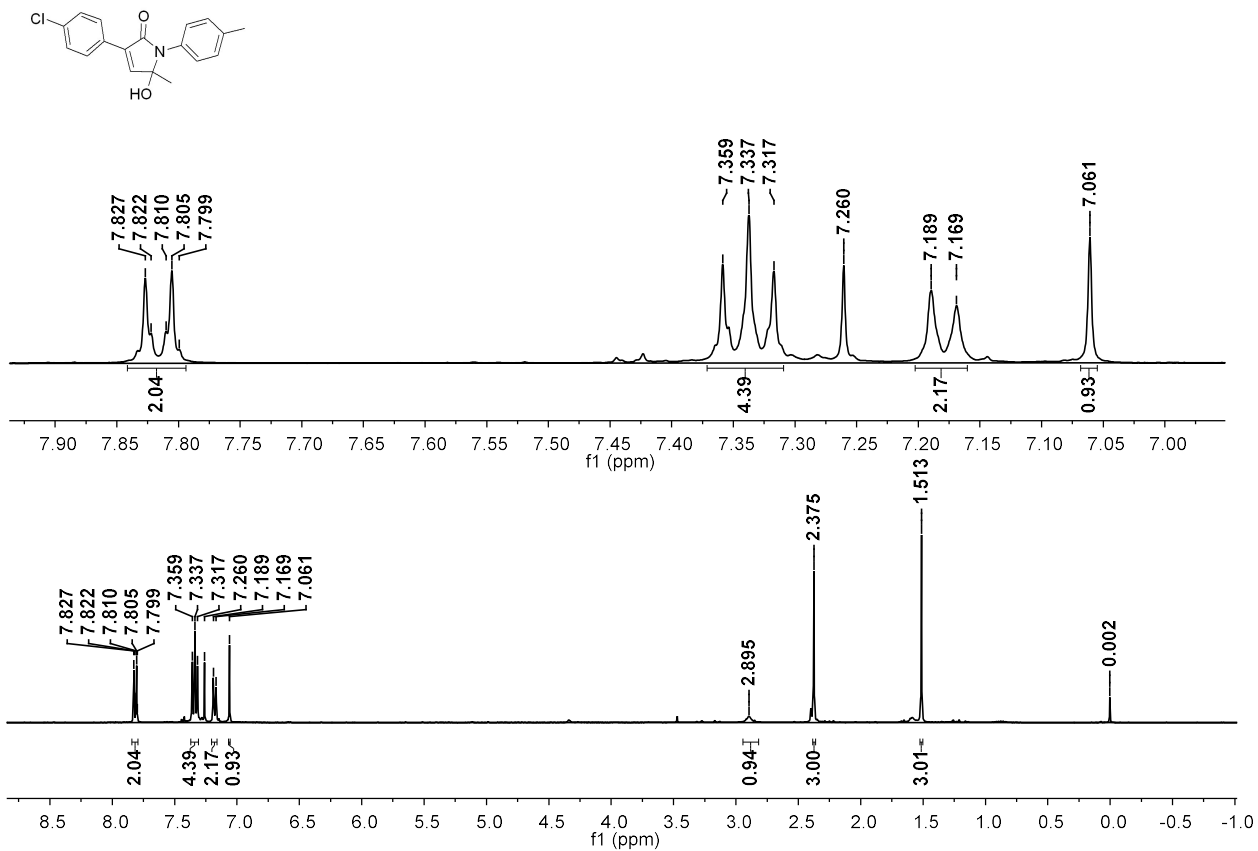

<sup>13</sup>C{<sup>1</sup>H} NMR spectra of **2ab** (151 MHz, CDCl<sub>3</sub>)

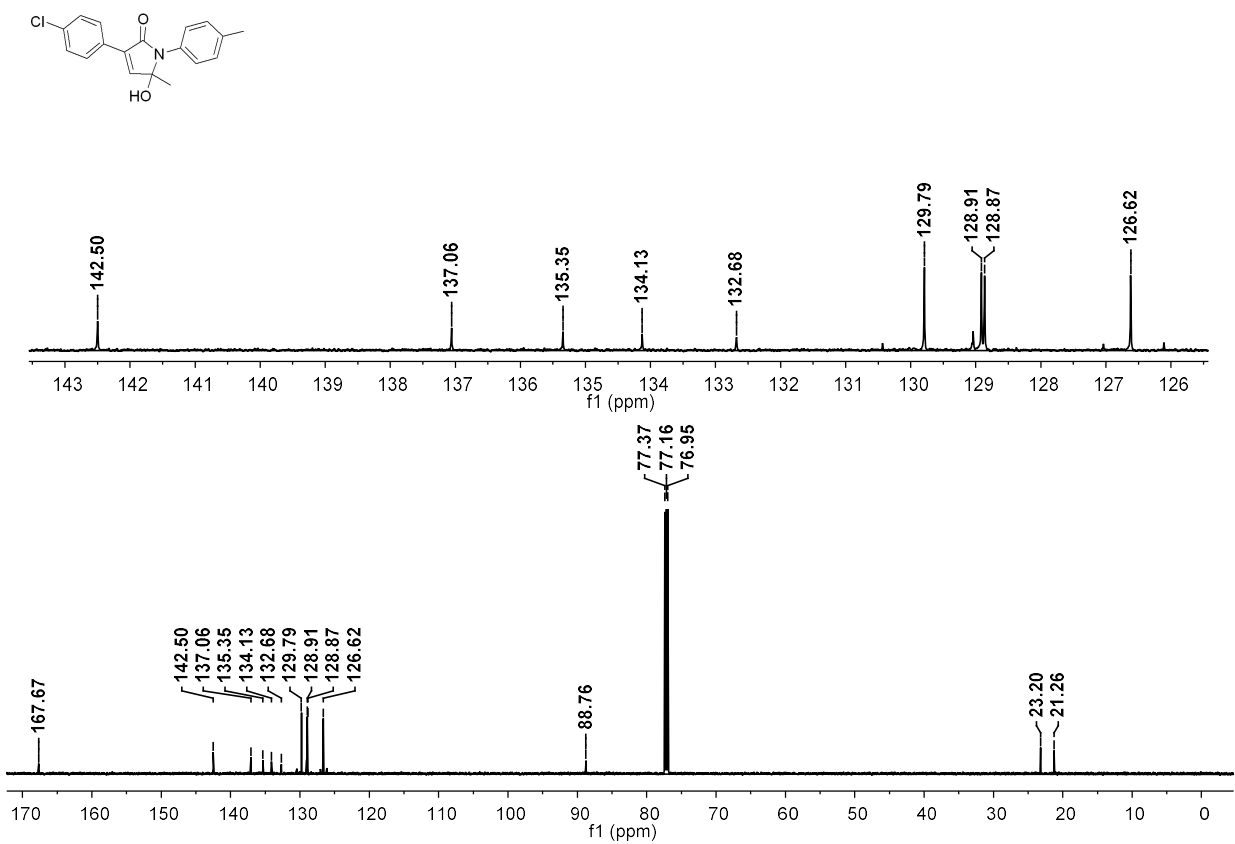

Supplement: d3ra05440c1.pdf [file d3ra05440c1.pdf]
